# Supplementary material for: The Gene Expression Program for the Formation of Wing Cuticle in Drosophila
Source: PLoS Genet. 2016 May 27;12(5):e1006100. doi: 10.1371/journal.pgen.1006100 (PMC4883753; doi:10.1371/journal.pgen.1006100)
Supplement: S2 Table — (XLSX) [file pgen.1006100.s006.xlsx]

## Sheet: Sheet1
tracking_id	gene_short_name	wing42h_FPKM	wing52h_FPKM	wing62h_FPKM	wing72h_FPKM	wing80h_FPKM	wing88h_FPKM	wing96h_FPKM		This Table shows average expression values (FPKM) for all genes at all time points.
FBgn0037411	Osi3	34331.2	31.2939	4.1346	6.83395	0.564426	1.51077	15.4753
FBgn0037419	Osi12	24307.6	15.6351	2.67506	5.7746	0.55077	1.36305	8.91485
FBgn0037416	Osi9	18660.4	15.7875	10.5422	6.70694	5.125	2.25496	7.98635
FBgn0035429	CG12017	12032.1	12.3018	2.45971	3.25435	0.475071	0.606015	5.41906
FBgn0013686	mt:lrRNA	10118.8	11282.7	8054.22	6648.19	8452.57	8538.93	16524.1
FBgn0036880	Cpr76Bc	8944.26	11.0425	10.927	5.60965	4.6892	30.8532	52.5526
FBgn0037414	Osi7	8346.38	13.7849	2.24924	1.28869	0.342152	0.698706	4.02265
FBgn0037992	CG4702	7584.5	5.88421	4.52791	1.17796	0.249626	0.250828	2.49927
FBgn0000451	ect	6571.69	50.2815	9.95001	3.06801	0.394212	0.791356	4.23851
FBgn0000042	Act5C	4185.73	106.429	249.211	944.39	5870.25	22252.9	24487.3
FBgn0031918	CG6055	4094.28	129.543	244.716	278.33	314.66	999.065	557.086
FBgn0066365	dyl	2917.4	161.951	62.0689	1.86764	0.614527	0.451303	1.47215
FBgn0026077	Gasp	2831.78	3629.61	2465.21	905.482	408.213	443.338	454.705
FBgn0052354	CG32354	2683.43	49.0346	5.37822	14.4254	9.2297	2.40968	6.35105
FBgn0013676	mt:CoIII	2624.05	3079.58	3040.97	2384.43	2886.33	2862.02	4459.68
FBgn0037406	Osi1	2557.59	1.14909	0.138534	0.756377	0.142077	0.271121	1.21543
FBgn0010470	Fkbp14	2477.86	438.931	173.1	22.0061	7.1243	5.83005	8.44514
FBgn0259233	CG42331	2467.76	1050.37	38.784	3.87254	0.605689	0.493855	1.60623
FBgn0051997	CG31997	2227.52	2264.2	4178.06	1939.41	1573.9	966.63	493.461
FBgn0037415	Osi8	2026.13	1.43519	0.357619	1.01037	0.947483	0.380328	1.8649
FBgn0038133	Osi22	1953.03	2.06116	0.211806	0.381866	0.276538	0.101038	1.94806
FBgn0037412	Osi4	1882.95	2.40234	0.0808243	0.643619	0.054373	0.0769596	0.361986
FBgn0000556	Ef1alpha48D	1878.83	910.246	1433.71	979.723	769.065	768.121	927.178
FBgn0066084	RpL41	1693.72	1022.01	1102.48	821.641	484.83	343.9	400.398
FBgn0033731	Cpr49Ah	1457.15	974.481	1569.73	353.285	40.9821	3.93349	10.5052
FBgn0013674	mt:CoI	1386.9	1645.84	1794.78	1447.03	1775.18	1665.29	2570.9
FBgn0001225	Hsp26	1332.38	234.565	367.52	118.021	125.771	11.1434	8.09815
FBgn0260745	mfas	1328.45	182.546	107.8	23.5798	20.7677	15.2404	13.5223
FBgn0003884	alphaTub84B	1327.49	1162.02	2295.48	7813.47	10140.3	7637.42	3567.79
FBgn0030778	CG4678	1316.86	12.8549	0.28893	0.680627	0.22993	1.31603	1.32316
FBgn0003887	betaTub56D	1300.6	854.525	2362.86	6762.57	7806.95	3190.03	788.257
FBgn0035321	CG1275	1286.26	288.917	97.5681	125.261	56.3302	14.6374	8.94616
FBgn0033912	RpS23	1271.53	1144.01	962.099	660.666	435.768	343.149	513.607
FBgn0023170	RpL39	1242.18	1116.24	940.456	625.696	597.33	545.487	759.68
FBgn0039217	CG13627	1154	10.7191	2.93333	0.541054	0.0261497	0.132671	1.45059
FBgn0013678	mt:Cyt-b	1146.12	1426.62	1334.13	1079.1	1243.25	1185.55	1994.97
FBgn0261606	RpL27A	1087.27	1117.75	955.078	639.153	492.487	491.562	803.81
FBgn0085364	CR34335	1073.22	980.905	770.098	575.432	723.302	616.428	1127.1
FBgn0003274	RpLP2	1065.33	1002.67	726.894	520.369	421.689	420.714	661.571
FBgn0261599	RpS29	1016.64	873.385	630.775	380.586	308.039	260.726	721.31
FBgn0030136	RpS28b	1010.7	951.29	847.15	584.527	444.675	413.815	603.748
FBgn0039713	RpS8	1003.65	808.825	825.527	557.243	434.794	380.365	546.13
FBgn0086472	RpS25	995.263	1070.34	933.755	708.134	614.099	675.401	1044.53
FBgn0004511	dy	977.911	43.2288	1.68212	0.192899	0.0752875	0.105932	0.610968
FBgn0036213	RpL10Ab	972.029	765.918	831.441	529.178	401.372	379.003	570.917
FBgn0038834	RpS30	962.737	896.876	808.65	609.474	546.955	559.613	830.609
FBgn0083978	CG17672	920.599	80.5395	19.4026	14.466	0.558305	0.133426	0.831663
FBgn0026084	cib	907.043	408.785	846.562	3191.67	7393.61	10354.8	10650.5
FBgn0261597	RpS26	904.721	832.496	775.488	524.94	535.957	563.092	876.521
FBgn0263132	Cht6	902.925	1334.34	1252.83	241.338	37.0969	6.02537	8.33469
FBgn0005533	RpS17	897.402	883.915	801.883	565.555	410.693	359.165	508.698
FBgn0026372	RpL23A	885.938	814.904	811.351	564.209	477.807	469.619	615.82
FBgn0034743	RpS16	884.864	740.548	707.345	500.284	366.46	347.028	493.003
FBgn0003942	RpS27A	864.422	779.444	682.879	448.696	388.469	367.338	569.089
FBgn0028697	RpL15	831.298	805.72	747.097	515.042	435.17	514.182	877.496
FBgn0039757	RpS7	824.127	731.89	781.983	548.207	404.701	351.05	461.594
FBgn0014026	RpL7A	822.596	697.646	749.838	508.94	414.213	387.22	532.751
FBgn0037351	RpL13A	822.323	711.724	726.784	511.663	369.476	343.334	461.025
FBgn0064225	RpL5	821.858	705.987	801.377	551.764	459.334	586.604	1128.42
FBgn0010411	RpS18	816.887	655.964	688.883	523.145	360.855	345.34	521.135
FBgn0002590	RpS5a	815.444	680.33	692.43	505.227	407.182	351.702	431.318
FBgn0002607	RpL19	810.494	775.981	738.797	509.758	436.363	412.322	642.864
FBgn0003941	RpL40	808.874	926.047	698.758	483.091	386.014	334.204	440.754
FBgn0037126	CG14567	805.456	56.0234	9.65514	1.09179	0.195649	0.111683	0.757196
FBgn0029785	RpL35	793.208	663.221	655.039	417.914	345.768	307.204	443.901
FBgn0030616	RpL37a	789.09	725.404	568.244	354.329	297.907	281.409	441.999
FBgn0261602	RpL8	778.533	649.029	701.604	475.975	333.161	320.711	464.672
FBgn0015756	RpL9	769.49	734.688	660.406	453.776	300.158	248.526	354.703
FBgn0031980	RpL36A	766.421	629.483	545.014	370.324	298.958	259.868	338.959
FBgn0002577	m	761.711	13.058	46.2728	0.351922	0.0658799	0.393555	0.615952
FBgn0003517	sta	761.399	559.748	588.346	351.313	225.738	160.309	188.289
FBgn0001254	ImpE2	757.145	5.4353	2.10302	0.430057	0.0830476	0.0474063	0.665472
FBgn0034967	eIF-5A	754.522	334.768	530.06	432.733	431.316	571.123	824.433
FBgn0031879	uif	752.001	141.35	150.648	83.9692	21.4163	4.84564	4.55334
FBgn0001149	GstD1	748.089	135.511	672.001	1189.86	837.293	326.434	139.401
FBgn0004403	RpS14a	746.473	748.011	600.535	423.573	405.284	416.021	611.95
FBgn0030159	CG9689	745.972	57.0618	61.9587	56.5235	16.8051	3.59785	98.8928
FBgn0250862	CG42237	730.566	8.31383	109.415	20.4423	13.2477	5.46534	2.54865
FBgn0025286	RpL31	729.781	613.006	550.888	333.055	272.73	230.944	305.86
FBgn0013675	mt:CoII	726.102	917.955	900.176	740.609	827.334	804.908	1200.02
FBgn0028984	Spn88Ea	725.011	516.252	100.791	56.6392	67.9027	135.465	110.967
FBgn0039749	CG11498	721.097	16.4634	2.38685	0.778345	0.225153	0.196741	0.641785
FBgn0010198	RpS15Aa	721.074	667.342	568.296	350.341	256.907	212.517	285.722
FBgn0032359	Osi21	720.22	0.156032	0	0.322288	0	0.0965324	0.453317
FBgn0011726	tsr	719.502	310.064	158.069	232.988	422.327	991.483	1384.73
FBgn0036825	RpL26	716.938	649.842	681.348	494.922	371.151	352.845	478.131
FBgn0002579	RpL36	713.36	813.124	712.697	511.299	389.471	392.453	693.042
FBgn0024733	RpL10	709.89	695.433	655.718	388.373	291.588	314.099	437.381
FBgn0032987	RpL21	704.068	740.314	708.257	556.437	464.762	519.628	927.922
FBgn0010409	RpL18A	699.676	620.154	616.378	397.88	288.134	275.092	362.22
FBgn0261113	Xrp1	692.89	365.219	283.131	160.72	130.022	72.9002	51.046
FBgn0004867	RpS2	689.432	680.973	613.881	433.725	283.634	218.571	271.775
FBgn0011284	RpS4	689.402	548.04	595.38	378.611	268.014	240.761	295.432
FBgn0010412	RpS19a	684.086	624.584	579.076	409.459	341.994	317.676	418.829
FBgn0038131	CG15888	678.138	0.697483	1.21838	0.58903	0.332878	0.498702	1.05088
FBgn0266521	stai	666.186	55.6598	19.3747	6.80729	10.0465	12.8959	17.3057
FBgn0262717	Skeletor	663.989	46.0976	174.691	214.866	61.7691	12.6768	7.85864
FBgn0037418	Osi11	662.717	0.505304	0.137822	0.250829	0	0.100172	0.352806
FBgn0010078	RpL23	659.315	645.505	603.897	419.684	318.973	309.192	436.429
FBgn0015766	Msr-110	658.797	3978.3	2565.61	1524.04	1018.88	558.537	259.948
FBgn0266599	Hsc70-4	653.517	772.822	686.448	762.429	1656.36	3110.35	4009.69
FBgn0001942	eIF-4a	648.213	446.322	543.778	506.817	640.427	1021.29	1815.12
FBgn0002622	RpS3	645.695	454.489	497.316	350.717	266.574	289.69	456.879
FBgn0029922	CG14431	644.102	17.3612	11.5156	13.4058	19.0604	7.19786	5.46935
FBgn0261592	RpS6	643.098	616.612	573.374	680.738	464.326	394.16	532.685
FBgn0037433	CG17919	636.024	445.727	249.072	161.695	162.071	167.891	583.643
FBgn0029807	CG3108	634.121	6.1708	0.044952	0.190891	0.0230507	0.0553083	0.230143
FBgn0029897	RpL17	626.087	501.546	484.027	342.55	283.384	253.733	354.337
FBgn0005593	RpL7	621.827	627.656	645.817	397.159	305.554	294.461	438.331
FBgn0032518	RpL24	620.572	602.623	494.195	355.836	249.126	256.902	467.399
FBgn0035398	Cht7	607.141	756.798	435.896	325.39	281.871	124.86	29.9076
FBgn0016726	RpL29	605.749	559.601	490.624	319.865	253.245	235.707	323.939
FBgn0010265	RpS13	604.486	582.885	633.35	444.471	352.328	298.08	396.854
FBgn0039359	RpL27	598.392	478.425	538.833	394.94	301.118	280.661	372.881
FBgn0002593	RpLP1	596.075	632.534	644.796	441.298	334.865	278.696	374.632
FBgn0034138	RpS15	590.392	572.872	586.651	424.148	330.241	289.146	434.78
FBgn0086710	RpL30	586.405	499.454	391.738	234.342	200.499	164.45	214.104
FBgn0262111	f	582.92	52.8628	67.2886	93.5367	23.1316	9.52729	3.47209
FBgn0033699	RpS11	580.451	548.331	492.882	358.07	283.39	265.87	369.555
FBgn0017545	RpS3A	575	531.892	617.191	676.156	658.374	681.165	972.871
FBgn0038198	Npc2b	571.742	102.883	164.089	120.465	181.146	69.9426	916.148
FBgn0034968	RpL12	571.44	553.484	572.034	381.32	275.454	269.292	356.736
FBgn0037874	Tctp	564.991	341.107	438.068	369.731	558.915	516.216	635.601
FBgn0039857	RpL6	563.67	482.673	439.463	307.044	271.198	268.461	416.11
FBgn0037665	St2	560.91	368.324	0.747589	0.127713	0.0388546	0	0.482816
FBgn0261593	RpS10b	560.763	609.985	648.599	454.511	325.897	267.518	390.18
FBgn0030870	CG6398	556.831	140.243	221.29	173.282	189.969	114.31	45.7581
FBgn0002626	RpL32	546.136	513.117	476.184	320.352	227.028	197.558	238.121
FBgn0034753	CG2852	544.21	134.694	119.261	63.8713	26.2214	13.0323	9.51905
FBgn0033359	CG8213	542.486	14.2241	1.85685	0.940287	0.203882	0.0641185	2.78933
FBgn0000559	EF2	541.509	513.374	660.353	399.781	330.09	481.024	918.158
FBgn0027600	obst-B	537.913	77.3169	116.279	75.2178	46.061	14.9758	33.5691
FBgn0261596	RpS24	534.153	517.741	529.239	317.43	230.465	212.192	278.647
FBgn0260441	RpS12	534.124	633.348	506.567	336.743	228.645	190.058	269.854
FBgn0039300	RpS27	528.754	465.455	412.177	266.88	225.572	203.071	273.569
FBgn0001233	Hsp83	522.908	193.674	722.303	869.787	928.989	608.771	105.305
FBgn0013981	His4r	521.924	453.625	323.83	242.376	223.015	223.574	199.863
FBgn0038339	CG6118	517.89	51.644	0.400187	0.181898	0.0204215	0.0779465	0.282575
FBgn0011695	PebIII	517.608	872.514	1469.34	627.29	1688.36	3539.84	20116
FBgn0014184	Oda	512.333	561.283	566.962	241.702	211.65	204.564	483.391
FBgn0013325	RpL11	511.604	466.025	494.314	353.238	241.113	222.263	362.331
FBgn0020910	RpL3	509.529	461.662	594.449	382.73	319.43	319.698	461.169
FBgn0001256	ImpL1	501.704	1.45345	12.6235	0.297388	0.0512449	0	0.354935
FBgn0017579	RpL14	500.977	398.356	450.656	282.555	244.313	250.609	357.132
FBgn0011272	RpL13	499.407	457.524	472.007	313.767	231.051	230.736	311.477
FBgn0037328	RpL35A	498.316	416.105	415.822	264.927	201.36	189.307	258.073
FBgn0003279	RpL4	487.823	354.117	452.198	327.289	251.271	245.677	320.776
FBgn0036681	Obp73a	483.062	6.45944	0.206374	0.448522	0.257983	0.10395	0.527892
FBgn0035422	RpL28	480.307	465.098	467.937	346.287	316.072	319.675	442.564
FBgn0028990	Spn27A	474.874	29.5665	21.1125	15.839	10.4566	6.1124	11.1162
FBgn0040007	RpL38	467.683	495.893	419.196	326.837	230.666	263.127	565.56
FBgn0010408	RpS9	465.822	405.533	370.236	249.928	169.878	150.275	218.332
FBgn0029573	CG14770	464.099	2700.43	32.1329	2.4437	0.616719	1.095	1.19341
FBgn0000100	RpLP0	463.78	429.695	405.736	273.31	221.012	216.434	211.946
FBgn0050101	CG30101	461.878	31841	4289.92	2605.76	617.975	96.2276	28.9337
FBgn0001092	Gapdh2	461.578	164.459	154.577	48.0194	51.2912	63.0227	66.1989
FBgn0028371	jbug	455.996	167.007	140.271	113.507	181.011	1251.29	1134.96
FBgn0003447	sn	452.24	7.95945	10.0247	3.88409	7.47497	3.02132	4.63786
FBgn0020618	Rack1	451.573	434.628	435.674	287.676	191.098	183.824	247.374
FBgn0003174	pwn	446.128	120.847	44.4608	22.5702	4.12995	0.907055	4.33339
FBgn0000370	crc	444.593	566.205	807.866	646.261	690.088	685.275	727.697
FBgn0000636	Fas3	443.356	354.941	363.189	280.928	67.7057	36.786	49.5246
FBgn0000043	Act42A	439.998	108.2	316.267	422.842	1887.94	2757.54	2882.44
FBgn0034661	CG4386	431.162	3.15652	1.44048	0.193853	0.0939373	0	0.285478
FBgn0015521	RpS21	431.148	419.366	394.707	264.948	214.391	189.385	249.591
FBgn0033153	Gadd45	429.034	207.792	144.508	32.552	17.7142	4.47062	87.5264
FBgn0038315	CG14866	427.975	28.6845	0.285993	0.88378	0.25999	0.0479789	0.0813525
FBgn0019936	RpS20	427.593	430.523	368.713	226.679	170.822	165.583	231.649
FBgn0263705	Myo10A	426.212	193.948	76.2893	58.1952	54.0919	57.6926	30.7716
FBgn0005585	Crc	413.58	207.889	265.495	110.403	66.6094	31.3515	16.6666
FBgn0037686	RpL34b	412.406	400.173	385.097	285.762	232.109	240.031	314.618
FBgn0261608	RpL37A	411.6	384.855	455.172	359.396	289.52	268.474	388.396
FBgn0030065	CG12075	408.999	118.987	70.9522	64.762	12.9414	4.22546	10.5342
FBgn0013688	mt:srRNA	406.131	136.583	93.341	92.2446	77.226	44.3391	226.469
FBgn0013672	mt:ATPase6	396.349	746.405	978.543	624.596	784.907	928.527	1507.75
FBgn0015288	RpL22	391.563	332.633	348.242	229.801	194.186	196	305.369
FBgn0029681	CG15239	391.46	23.7094	14.5158	1.32362	0.130488	0.157622	0.431719
FBgn0000308	chic	383.564	65.2894	60.7229	188.416	1047.21	3021.01	3743.87
FBgn0053113	Rtnl1	379.748	67.9416	47.4839	20.9317	140.687	383.19	216.385
FBgn0035753	RpL18	378.374	330.508	327.553	192.347	131.423	117.637	130.912
FBgn0014163	fax	378.342	203.569	132.442	51.4977	27.2103	13.166	25.4897
FBgn0013679	mt:ND1	372.394	404.609	462.428	403.642	487.163	435.154	620.372
FBgn0014002	Pdi	370.443	144.538	88.4162	93.1333	60.9532	31.9669	45.3744
FBgn0260386	mtg	369.443	53.8105	53.6547	49.7233	46.4889	37.9252	10.9712
FBgn0001321	knk	366.379	182.556	82.2407	30.155	4.93809	6.94275	61.2347
FBgn0004404	RpS14b	362.377	343.578	284.235	217.798	178.69	172.295	274.036
FBgn0051363	Jupiter	357.163	249.261	120.631	84.7385	60.2623	29.9534	13.5244
FBgn0000064	Ald	352.35	171.713	104.604	55.0213	77.0189	74.2128	171.941
FBgn0034142	CG8306	352.317	150.132	79.9222	79.3636	56.4237	30.2747	55.9731
FBgn0038088	CG10126	345.94	27.1897	17.3439	47.7069	267.618	894.345	785.741
FBgn0039479	CG14257	345.15	608.845	25.9257	383.208	430.155	22.6126	9.1023
FBgn0030617	CG9095	344.52	78.1206	122.766	153.378	176.469	73.3467	10.5592
FBgn0015221	Fer2LCH	340.334	328.417	313.642	248.36	179.851	136.426	321.581
FBgn0011661	Moe	338.695	441.878	57.9308	69.4141	219.114	810.947	1077.77
FBgn0027527	Osi6	337.192	3.34921	0	0.126299	0	0	0
FBgn0003016	osp	336.593	130.47	118.559	78.3064	44.7096	20.4627	9.73182
FBgn0032586	Tpr2	336.01	234.336	30.7402	32.5451	29.3	40.0194	780.709
FBgn0265297	pAbp	334.942	701.796	317.322	301.812	437.347	638.753	984.226
FBgn0038149	GILT1	326.469	570.366	653.237	463.658	188.596	77.5598	43.0254
FBgn0001248	Idh	317.534	149.25	106.391	168.188	133.044	115.991	54.5561
FBgn0039858	CycG	315.512	185.238	173.022	129.287	153.195	371.376	332.57
FBgn0010435	emp	311.403	418.869	576.494	233.993	203.699	620.217	348.378
FBgn0029128	tyn	308.539	175.187	36.2341	16.6275	2.86759	1.65832	1.72685
FBgn0264491	how	307.442	95.7618	120.62	143.716	114.841	48.9721	29.1434
FBgn0013681	mt:ND3	305.136	400.85	360.374	325.503	353.981	288.107	348.374
FBgn0053129	CG33129	303.711	84.2176	39.5624	24.8374	18.3558	16.5242	15.0203
FBgn0262737	mub	301.814	63.1505	195.365	105.519	47.5748	7.97368	11.9367
FBgn0037409	Osi24	296.683	13.3298	11.3408	19.4734	0.823106	0.0889317	0.365421
FBgn0000075	amd	294.009	35.0774	7.97501	0.646057	0.147855	0.632578	0.918014
FBgn0037044	CG10585	289.479	38.7624	35.1476	79.2932	71.1852	61.6951	73.9456
FBgn0029176	Ef1gamma	287.041	171.176	196.006	147.275	121.651	113.179	139.727
FBgn0030027	CG1632	286.467	164.15	63.3316	19.1327	8.58444	3.32022	2.1465
FBgn0037364	Rab23	285.951	117.594	44.7045	60.5935	38.9641	6.97483	1.8239
FBgn0013272	Gp150	282.441	127.768	153.524	154.898	198.1	256.94	228.028
FBgn0040361	CG14627	281.034	627.854	4.1712	2.65036	0.941204	0	0.497529
FBgn0000547	ed	280.199	164.092	104.09	57.2071	36.1463	24.328	40.1761
FBgn0035574	RhoGEF64C	277.579	20.396	62.5875	22.3801	5.97769	4.21861	7.85619
FBgn0038610	CG7675	277.145	45.5355	7.3996	1.27014	0.684593	0.14331	2.65703
FBgn0027547	CG1927	275.738	186.812	119.354	86.9152	62.9635	64.9002	76.0735
FBgn0086357	Sec61alpha	273.378	204.86	49.4006	27.0654	16.4704	13.4559	10.9359
FBgn0031490	CG17264	272.738	36.6306	3.26698	3.71769	6.5146	8.46356	12.0653
FBgn0051344	CG31344	272.66	57.0991	5.39267	12.7712	20.7932	14.3048	6.45783
FBgn0036716	CG13728	272.644	13.7706	0.373133	0.11909	0.113295	0.222716	0.406841
FBgn0033663	ERp60	272.614	62.7373	65.155	72.0573	70.3707	44.6388	17.436
FBgn0015222	Fer1HCH	270.864	284.666	321.221	257.152	184.238	146.957	398.478
FBgn0034391	CG15080	266.906	1770.51	97.1483	82.8961	25.2616	5.04877	7.91185
FBgn0053978	CG33978	264.203	484.336	172.646	61.575	72.9603	72.4019	68.1216
FBgn0035755	CG14830	263.361	353.733	130.674	136.298	230.939	237.514	123.62
FBgn0036677	CG13023	263.177	0.710834	0.482835	0.304027	0.180571	0.267881	0.153168
FBgn0086558	Ubi-p5E	262.682	233.321	306.42	271.465	326.653	726.861	2176.89
FBgn0040382	CG5273	262.277	206.667	103.956	76.3615	103.262	118.566	66.8753
FBgn0261673	nemy	262.154	37.79	21.8223	2.50662	10.8393	54.8785	47.3612
FBgn0001316	klar	260.949	73.2615	91.0652	56.7165	18.8963	25.0721	136.64
FBgn0014141	cher	259.013	0.440813	3.29854	2.27119	109.675	1941.26	1672.58
FBgn0038679	CG6040	255.849	411.927	44.1281	61.4511	13.3628	9.85853	953.681
FBgn0038676	CG6026	254.945	11.6279	1.22714	1.0614	0.207794	0.0148269	0.125656
FBgn0013770	Cp1	253.032	237.325	313.036	133.073	117.706	112.371	102.827
FBgn0011584	Trp1	252.535	113.005	56.0101	45.5547	42.9431	31.3798	23.5803
FBgn0261799	dsx-c73A	251.764	0.955652	0.727319	0.227985	0.0405742	0	0.0785234
FBgn0032299	CG17127	251.402	2462.81	64.7122	177.571	64.1742	2.74672	0.978902
FBgn0022893	Df31	250.268	107.487	203.448	237.873	242.158	143.554	60.6942
FBgn0033668	CG13188	247.681	594.705	344.574	118.552	28.7344	5.80986	49.596
FBgn0039265	CG11790	247.36	88.0272	83.7236	174.966	239.771	95.9829	74.7484
FBgn0052816	CG32816	247.28	1088.49	37.3955	38.8004	50.1606	44.9513	60.1311
FBgn0260003	Dys	246.928	34.5481	32.0291	13.5653	12.5657	40.0444	101.296
FBgn0037410	Osi2	245.801	120.865	3.90643	0.543749	0	0	0
FBgn0004828	His3.3B	244.981	270.653	191.498	136.487	134.862	131.391	109.376
FBgn0032582	CG13258	244.78	1195.51	3.76108	0.622585	0	0	0.174556
FBgn0039527	CG5639	244.39	205.878	262.665	49.9782	75.9262	90.561	29.2423
FBgn0040600	CG13631	243.335	503.886	36.5956	4.38603	7.51798	12.7219	9.07417
FBgn0038660	CG14291	243.099	16.1635	7.1385	0.974395	0.539726	0.211626	0.303911
FBgn0039795	Spn100A	242.773	0.324505	20.0937	29.8792	7.99112	0.975375	1.5091
FBgn0259247	laccase2	240.097	728.631	844.925	388.671	200.137	254.356	182.241
FBgn0034797	nahoda	238.341	372.416	223.961	130.769	155.487	125.65	35.6419
FBgn0037664	CG8420	237.479	11.5791	3.21751	0.242616	0.0303062	0.128375	0.303248
FBgn0029838	CG4666	235.133	78.6659	7.67933	4.02879	0.640651	0.178729	0
FBgn0082582	tmod	233.585	242.641	121.099	99.6839	65.1606	122.069	167.883
FBgn0259223	CG42323	232.312	33896.8	12121.8	14318.2	4989.05	1598.9	1156.56
FBgn0051637	CG31637	231.553	34.613	28.0585	42.6022	35.5163	18.3029	12.9848
FBgn0000253	Cam	231.321	86.6788	175.843	154.516	188.791	553.123	978.31
FBgn0029866	CG3842	229.159	20.8977	5.62772	9.90025	32.3074	135.401	114.373
FBgn0086673	CG13272	227.826	15.2328	4.90147	1.63366	0.155747	0.0356865	0.126342
FBgn0000567	Eip74EF	226.333	25.7195	25.268	83.674	138.26	160.1	167.495
FBgn0040070	Trx-2	224.029	224.218	106.504	75.2789	73.496	115.505	313.568
FBgn0259238	CG42336	223.742	43.9465	13.9074	16.3768	11.2643	3.65777	2.50269
FBgn0030160	CG9691	223.738	68.9622	79.331	62.1586	96.4062	431.966	7409.37
FBgn0003261	Rm62	223.646	191.387	127.91	118.216	136.156	145.872	288.647
FBgn0004577	Pxd	221.813	304.711	2887.06	855.877	321.839	69.0116	206.641
FBgn0259731	tal-2A	216.858	281.532	4.39125	0.818695	0.863144	17.1519	67.2957
FBgn0001311	kkv	216.459	271.214	175.43	98.5449	30.5625	4.19435	9.75253
FBgn0024989	CG3777	215.168	73.7921	123.328	155.825	34.4298	46.5203	461.436
FBgn0039805	Cpr100A	214.588	990.302	1470.41	440.286	17.707	4.92144	231.862
FBgn0051176	CG31176	214.305	37.5402	216.13	20.6055	2.07567	1.82715	161.721
FBgn0262952	mt:ND4	212.969	265.946	231.366	200.271	228.059	206.264	288.77
FBgn0262614	pyd	212.914	77.5271	144.837	39.9202	24.8154	38.5756	58.5271
FBgn0054038	CG34038	212.499	20.3071	3.65973	1.00708	0.354412	0.29878	1.09886
FBgn0038959	CG13856	208.707	2.20077	2.8344	2.81466	5.74384	8.34601	6.95949
FBgn0260635	Diap1	208.36	127.697	143.666	107.019	84.5017	141.592	148.587
FBgn0250753	kra	208.047	121.65	99.7503	67.0097	64.828	141.702	596.078
FBgn0035844	CG13676	208.018	288.991	327.299	178.769	66.1355	32.0432	18.274
FBgn0000083	AnxB9	205.765	522.961	298.034	379.123	548.038	1299.87	1816.74
FBgn0035203	CG9149	205.05	15.3183	8.69111	17.7669	8.49773	13.1263	20.5375
FBgn0022800	Cad96Ca	205.048	31.6997	19.4815	30.7586	26.2886	7.90502	12.0576
FBgn0050463	CG30463	203.827	3.24597	8.16317	10.9662	8.63647	4.63682	9.84139
FBgn0013684	mt:ND5	201.992	241.922	261.862	188.322	227.974	208.852	282.105
FBgn0011236	ken	201.443	118.145	82.2721	44.5186	20.6719	18.1977	96.9787
FBgn0250732	gfzf	201.034	138.189	28.4179	74.7224	75.0742	49.4776	49.0973
FBgn0027341	Gfat1	200.917	1081.72	333.731	87.5343	32.5573	23.1945	73.9852
FBgn0015872	Drip	200.488	40.2077	0.544809	112.452	486.564	179.667	120.023
FBgn0032400	CG6770	199.786	202.361	212.307	768.072	721.529	763.073	2147.03
FBgn0036208	CG10361	199.467	4.94499	3.03448	1.79429	2.10917	1.35764	1.43732
FBgn0052029	Cpr66D	198.289	4263.03	696.418	313.474	96.0446	10.2409	0.905239
FBgn0028737	Ef1beta	197.43	140.172	131.92	94.6104	70.1785	55.1178	58.5298
FBgn0001253	ImpE1	194.095	0.263191	0.279877	0.244463	0.0135859	0.0520773	0.093433
FBgn0029002	miple2	193.006	1240.38	335.622	59.9908	6.95701	3.50934	67.4883
FBgn0001112	Gld	192.989	345.824	85.5813	312.177	496.627	388.193	138.226
FBgn0052672	Atg8a	190.564	169.737	160.983	172.153	312.51	666.08	974.759
FBgn0028468	rtet	189.388	127.795	15.5931	12.3265	7.95547	9.57964	20.7354
FBgn0001218	Hsc70-3	188.493	30.7887	50.0965	27.7928	24.3367	17.7633	9.38607
FBgn0086904	Nacalpha	188.082	123.48	259.893	301.617	303.362	279.862	258.604
FBgn0259211	grh	187.968	49.3483	57.523	60.0715	55.7388	68.4176	96.5903
FBgn0026250	eIF-1A	185.585	107.544	102.324	89.6939	106.455	211.082	357.65
FBgn0020294	ko	184.738	45.9761	25.2747	13.2593	177.88	215.698	144.919
FBgn0036382	CG13737	184.212	184.201	155.69	69.3414	37.9725	15.7571	3.99611
FBgn0035523	CG1311	183.087	49.3366	24.9129	30.2815	42.6594	40.6539	55.0686
FBgn0010348	Arf79F	183.02	198.517	111.408	113.306	117.859	126.858	148.867
FBgn0032362	spz4	182.3	39.3089	18.1874	2.47883	0.874349	0.106558	0.484243
FBgn0039896	yellow-h	181.999	296.675	174.908	79.3853	54.1353	51.0942	48.6146
FBgn0026059	Mhcl	181.837	64.6872	51.0441	34.1004	27.8715	7.89165	9.45623
FBgn0003514	sqh	181.561	172.692	368.285	604.581	1419.53	2527.94	1583.93
FBgn0031097	obst-A	179.506	1636.84	186.096	133.572	54.555	2.7904	64.0658
FBgn0039690	CG1969	177.308	169.088	138.683	87.7611	9.25523	3.85754	167.408
FBgn0016076	vri	177.21	2.08703	1.54703	0.429846	2.30187	1.01334	9.21264
FBgn0036372	Abp1	176.505	19.6368	14.4164	14.7953	8.04334	5.14484	12.3338
FBgn0027570	Nep2	175.233	1080.77	364.101	391.081	132.855	82.2261	103.952
FBgn0036816	Indy	174.314	60.0002	33.9347	57.3382	25.3077	85.1732	262.439
FBgn0039464	CG6330	170.791	45.5759	249.281	180.979	167.801	31.1308	9.64763
FBgn0015218	eIF-4E	170.74	209.679	192.776	134.965	157.237	170.307	109.457
FBgn0038348	AOX2	169.883	7.25687	1.14589	0.11463	0.105212	0.0295951	0.565251
FBgn0032949	Lamp1	169.844	213.745	155.338	181.278	185.951	166.281	177.209
FBgn0087011	CG41520	169.831	330.662	156.881	93.5382	55.5285	127.502	254.469
FBgn0025814	Mgstl	165.934	52.6117	61.4886	63.1978	78.0527	76.957	95.6845
FBgn0061359	CG33671	165.57	174.119	1.7719	2.0433	7.13463	2.11481	2.28911
FBgn0047135	CG32276	164.846	262.686	116.996	83.2243	65.1792	67.8584	44.6226
FBgn0004003	wbl	164.339	2.71456	12.25	15.6795	8.18106	1.81567	1.50099
FBgn0037427	Osi17	162.492	4.58198	0.401764	0.198854	0.12849	0.0265527	1.08952
FBgn0035512	Cpr64Ac	162.162	307.628	21928.6	54553.4	17287.7	2847.88	848.263
FBgn0013718	nuf	161.649	96.9905	35.5068	41.3524	49.6122	60.6002	150.457
FBgn0028572	qtc	161.605	9.7278	18.2683	7.37778	15.7717	6.8863	27.578
FBgn0039851	mey	161.584	0.0912989	1.83395	0.32151	0.113375	0.0974527	0.218473
FBgn0000150	awd	161.099	90.9662	128.543	122.461	104.706	95.1406	48.3238
FBgn0052521	CG32521	160.887	67.4831	6.56349	7.70275	30.5909	350.87	1307.67
FBgn0250848	26-29-p	160.749	21.7222	46.1401	81.338	66.4681	50.7923	62.517
FBgn0030234	CG15211	160.412	31.5733	43.2129	68.9517	63.0602	32.5454	23.7889
FBgn0033524	Cyp49a1	158.877	72.8229	242.454	50.4369	31.1483	10.8014	2.00218
FBgn0264959	Src42A	157.433	95.5566	93.8482	54.3308	40.6441	32.4464	154.767
FBgn0030038	CG1440	157.294	184.359	42.3	29.4971	11.1357	6.93122	219.092
FBgn0260462	CG12163	156.932	161.82	269.493	126.321	74.9184	69.8468	336.735
FBgn0264272	mwh	156.904	182.634	14.0245	55.5716	103.072	42.3887	7.74055
FBgn0034974	CG16786	156.175	473.448	511.383	263.486	173.011	83.5786	44.8095
FBgn0262736	Vha16-1	155.58	183.287	184.237	273.9	837.739	1474.36	967.463
FBgn0031453	Bacc	154.851	69.9646	67.5258	29.319	70.3949	53.4332	143.576
FBgn0033753	Cyp301a1	154.288	40.0298	57.4271	48.1891	36.821	20.7799	4.4858
FBgn0039776	PH4alphaEFB	152.699	47.9009	25.3979	40.9536	11.1023	82.0215	332.933
FBgn0259176	bun	152.524	228.495	57.7024	52.9525	102.335	114.053	102.997
FBgn0003382	sha	152.358	58.0009	74.3142	27.363	14.1273	2.63441	0.722139
FBgn0024366	CG11409	152.238	177.476	149.554	88.0859	52.2397	26.2157	9.87593
FBgn0004167	kst	152.026	6.05399	24.0349	30.3994	34.1443	33.5592	10.7918
FBgn0000117	arm	151.738	127.712	102.829	93.9501	71.5621	69.6245	74.2691
FBgn0020238	14-3-3epsilon	151.72	147.087	129.546	117.087	162.267	286.776	453.603
FBgn0028327	l(1)G0320	151.473	177.284	50.5248	29.1118	18.3552	10.9716	5.47366
FBgn0027588	CG14476	151.448	63.2504	51.7132	52.386	49.1537	33.5378	13.974
FBgn0010638	Sec61beta	149.92	137.056	59.5087	40.653	31.3539	20.7486	6.20924
FBgn0001223	Hsp22	147.973	61.0219	58.7598	10.3099	13.7352	5.10978	1.98302
FBgn0033504	CAP	147.332	15.5861	8.1626	3.63094	2.78609	1.83741	28.8051
FBgn0010611	Hmgs	145.666	22.7479	7.16666	53.1413	16.1826	16.5557	7.80556
FBgn0037313	CG1161	145.31	87.4399	58.057	69.4846	67.2677	69.7189	63.606
FBgn0085412	CG34383	144.758	27.5101	47.7424	33.8931	19.4224	18.5269	16.7083
FBgn0030731	Mfe2	143.937	174.32	235.539	59.3464	21.0595	19.1816	11.9409
FBgn0035237	CG13917	143.922	34.1529	11.6282	10.2578	6.2823	5.01363	13.6837
FBgn0000489	Pka-C3	143.84	33.9428	16.548	4.87156	2.28887	3.31887	2.62906
FBgn0052626	AMPdeam	141.642	14.1398	5.30269	3.60238	3.01944	3.47197	3.69992
FBgn0037323	CG2663	140.65	471.279	4520.27	24.6654	2.01433	0.153731	0.4566
FBgn0027610	Dic1	139.229	144.573	34.8008	70.547	123.053	415.537	990.026
FBgn0031681	pgant5	138.898	7.75112	5.80887	8.86693	10.265	11.1492	20.0894
FBgn0019925	Surf4	138.437	102.903	41.5083	36.3809	24.4294	27.2411	22.2051
FBgn0011016	SsRbeta	138.38	129.695	48.3054	29.1891	17.9278	8.31275	2.45399
FBgn0011760	ctp	138.34	107.567	70.4451	93.9863	145.896	167.086	277.991
FBgn0029092	ced-6	138.303	182.97	109.236	58.2519	43.2343	39.53	272.077
FBgn0039167	CG17786	137.803	110.704	41.067	53.9685	30.8103	1.69411	66.0202
FBgn0052855	CG32855	137.705	36.7988	0.77998	0.324599	0.211446	0.040228	0.0681778
FBgn0086706	pix	136.514	75.732	75.5233	61.6701	57.8696	87.7626	167.638
FBgn0031049	Sec61gamma	136.428	91.4959	28.1478	15.7997	9.22568	7.77906	5.72857
FBgn0005630	lola	136.247	55.9613	36.0535	16.1905	15.1814	41.8372	74.6088
FBgn0040358	CG14625	135.296	156.204	6.66088	66.6466	4.77617	0.216239	2.93901
FBgn0015801	Reg-5	135.264	23.0911	12.764	5.01335	58.2322	193.906	111.89
FBgn0036537	CG18081	135.049	111.682	38.0362	26.0945	19.2269	18.8421	26.6435
FBgn0037779	CG12811	134.823	12.5619	9.01903	6.30448	4.55626	3.53688	3.77354
FBgn0004838	Hrb27C	134.695	103.717	52.6467	61.5511	86.1007	85.5339	51.1488
FBgn0034354	GstE11	134.187	38.1087	37.3164	38.3117	23.2885	8.91541	38.0912
FBgn0020304	drongo	133.587	192.613	72.4489	36.9596	29.0638	39.2197	394.319
FBgn0022702	Cht2	132.859	137.152	75.7682	44.0131	12.9733	8.90396	23.2397
FBgn0014010	Rab5	131.233	70.9977	52.3894	73.5224	109.235	176.375	401.658
FBgn0001091	Gapdh1	131.076	49.0807	96.2991	28.5913	43.0541	79.6353	104.691
FBgn0037537	CG2767	130.747	81.3399	32.6411	26.0265	37.1951	61.8491	47.277
FBgn0053144	CG33144	130.409	25.0751	37.4329	25.8221	38.2897	42.4866	22.152
FBgn0003891	tud	130.156	79.125	89.2814	108.381	166.69	187.682	224.713
FBgn0266046	CR44811	129.919	150.787	183.459	104.417	110.01	104.244	256
FBgn0003721	Tm1	129.539	58.1989	64.7271	442.296	2790.02	4197.41	2207.28
FBgn0263106	DnaJ-1	129.485	61.3106	162.936	159.451	202.283	94.5762	88.6563
FBgn0010488	NAT1	129.299	70.1315	60.3539	76.5133	77.3068	98.8599	543.693
FBgn0027596	CG10249	129.211	43.0986	30.2755	18.2059	14.7639	19.4318	27.9809
FBgn0032192	CG5731	128.862	289.299	95.3954	35.4955	48.259	25.0779	10.2361
FBgn0050380	CG30380	128.706	111.157	115.112	35.7826	13.9994	7.97573	9.26112
FBgn0001297	kay	128.474	55.8282	47.81	36.0418	55.8651	128.738	107.422
FBgn0030360	CG1806	127.882	48.4326	46.5418	26.3101	26.3241	21.0518	106.647
FBgn0027654	jdp	126.953	22.9132	15.7286	16.4472	12.6848	47.7423	277.319
FBgn0034590	Magi	126.619	11.4959	15.3226	7.33855	5.62308	3.63811	5.51724
FBgn0035508	CG15005	125.914	234.381	0.814001	0.555817	1.52293	4.3828	0.895815
FBgn0040660	CG13551	125.803	119.173	98.8064	113.903	120.203	76.2361	35.7793
FBgn0262624	Tmhs	124.17	201.858	88.6253	11.5135	5.39689	0.986697	9.45604
FBgn0034022	CG12964	123.595	87.461	35.8504	18.9081	2.25347	0.102445	0.0352015
FBgn0003165	pum	122.766	34.6813	18.6673	13.1137	10.4221	6.98172	3.28787
FBgn0053208	Mical	121.79	12.1607	33.6912	8.89733	8.87063	57.8356	154.642
FBgn0035802	CG33275	121.763	17.1023	48.1756	53.6802	65.573	242.481	726.319
FBgn0004432	Cyp1	121.673	129.643	305.586	297.163	435.358	393.757	207.715
FBgn0010238	Lac	121.175	100.315	218.58	212.411	175.227	74.3633	43.9131
FBgn0061360	CG33672	120.57	53.2444	9.68942	32.7535	36.8724	24.3122	12.8231
FBgn0086901	cv-c	120.462	149.642	77.1319	34.9291	37.4454	97.1216	109.81
FBgn0025637	SkpA	120.205	136.868	190.416	187.103	179.837	162.293	118.136
FBgn0086355	Tpi	120.055	27.7124	77.4194	42.8198	63.4082	44.3083	23.636
FBgn0039709	Cad99C	119.863	216.964	156.283	63.3318	34.7864	19.0328	29.6254
FBgn0014869	Pglym78	119.8	7.17655	28.5635	36.0769	64.4703	69.7679	47.5647
FBgn0021953	Fatp	119.405	21.7765	29.4373	213.954	301.703	116.859	44.5901
FBgn0013954	FK506-bp2	118.67	90.8411	63.1679	59.8776	91.6485	109.796	59.049
FBgn0262109	CR42862	118.186	144.969	226.681	145.817	161.155	304.275	358.514
FBgn0087007	bbg	117.872	56.4294	167.764	88.4618	44.3492	10.8268	8.29259
FBgn0058045	CG40045	117.813	126.603	91.0557	83.4757	73.2443	77.9159	67.8469
FBgn0011217	eff	117.672	136.985	115.294	169	131.496	149.136	201.582
FBgn0035308	CG15822	117.548	48.154	54.1716	41.7783	29.0614	41.8378	96.0362
FBgn0035720	CG10077	117.543	129.7	107.065	85.1488	83.7056	59.6297	33.6165
FBgn0004370	Ptp10D	117.287	112.425	33.7993	23.525	20.4826	13.5131	18.1825
FBgn0261341	verm	116.493	2034.17	622.723	238.058	140.569	68.4178	116.529
FBgn0259685	crb	116.425	114.631	62.7263	31.0662	39.1374	47.872	23.5808
FBgn0003360	sesB	116.302	229.651	117.535	125.721	224.245	408.53	586.764
FBgn0010225	Gel	115.455	200.062	108.015	49.7679	114.399	487.55	656.333
FBgn0015795	Rab7	115.101	233.796	61.3238	62.7567	73.554	117.725	279.541
FBgn0262081	Csk	115.086	44.8791	60.6313	33.7118	43.8031	34.4976	30.7129
FBgn0063494	GstE6	115.071	95.9834	27.6363	10.2276	14.2045	21.3301	13.0192
FBgn0003943	Ubi-p63E	114.664	162.81	176.385	135.778	153.349	95.9334	257.647
FBgn0053094	Synd	114.608	38.981	17.934	25.7226	32.5752	66.6744	82.8051
FBgn0003074	Pgi	114.566	27.9211	31.7138	20.2615	32.6965	95.4195	238.974
FBgn0085443	spri	114.431	86.1335	38.9544	17.2882	7.97656	6.33656	4.37424
FBgn0024807	DIP1	114.349	49.0175	49.1607	47.5223	45.2833	38.8887	27.075
FBgn0050147	Hil	113.799	350.562	34.9145	32.2492	43.9197	45.6941	29.6368
FBgn0014020	Rho1	113.214	143.998	100.467	101.304	139.368	228.022	368.889
FBgn0050035	Tret1-1	113.014	268.162	117.998	11.8616	3.57211	5.64457	179.812
FBgn0022238	lolal	112.611	72.9269	116.23	38.8056	21.2372	14.1194	60.1181
FBgn0000721	for	112.26	58.6279	47.1554	33.7827	25.8484	22.6822	64.9992
FBgn0021872	Xbp1	112.087	112.83	117.185	105	115.112	104.83	90.761
FBgn0000181	bic	112.025	95.9708	164.151	106.809	105.597	126.139	109.636
FBgn0051973	Cda5	111.833	136.263	786.48	246.955	64.4266	28.634	14.8113
FBgn0262116	CG40127	111.713	123.573	110.186	106.194	162.479	233.041	231.893
FBgn0021795	Tapdelta	111.641	106.657	45.0733	42.7298	33.5584	27.7756	15.0899
FBgn0003187	qua	111.36	23.9925	9.6409	0.909482	0.214782	0.383455	0.250617
FBgn0050438	CG30438	111.257	143.049	49.8757	19.2729	12.8416	23.4642	35.888
FBgn0035904	GstO3	110.914	171.602	189.65	74.2172	62.7158	53.0372	47.0501
FBgn0015790	Rab11	110.257	82.557	67.8689	76.6177	82.1073	103.257	85.9428
FBgn0026753	Vha13	109.569	227.544	169.072	186.273	569.895	1300.41	1346.35
FBgn0025700	CG5885	109.377	93.4513	30.7801	18.8015	14.2956	9.4793	3.32524
FBgn0027529	CG8920	109.326	28.5187	15.8849	10.2588	9.17308	10.1186	54.2017
FBgn0034914	CG5554	108.586	82.2053	101.576	181.865	161.767	62.6366	15.5509
FBgn0010235	Klc	108.444	59.4773	57.4165	46.5349	58.2447	107.209	119.782
FBgn0267376	SelR	108.399	40.7342	13.6121	18.2653	72.984	197.674	130.787
FBgn0263258	chas	108.248	46.2503	94.2916	117.566	93.4185	46.7723	90.0883
FBgn0265140	Meltrin	107.749	12.6632	11.4931	34.5102	21.4805	3.11883	7.49208
FBgn0265274	Inx3	107.478	76.2123	148.768	115.585	138.897	179.081	253.711
FBgn0000565	Eip71CD	107.287	3.95954	7.90308	9.2668	44.2339	86.3001	132.601
FBgn0259735	CG42389	107.185	118.336	98.0425	54.6085	9.73796	4.40223	6.09623
FBgn0042098	CG18735	106.767	0.160267	0.103927	0.0437052	0.0699538	0.0686768	0.349216
FBgn0000422	Ddc	106.254	130.194	30.4832	543.007	510.093	837.702	826.372
FBgn0263934	esn	106.178	68.5492	45.7054	9.1023	3.00018	10.0185	9.77467
FBgn0038830	CG17272	106.072	20.4447	17.443	12.3542	14.3225	13.5987	5.67229
FBgn0032230	lft	105.94	129.837	55.4515	57.5553	56.1129	53.2018	46.859
FBgn0016693	Past1	105.565	56.5078	65.6779	39.243	75.6658	174.463	153.087
FBgn0250906	Pgk	105.142	36.3229	59.5575	19.9952	40.7546	51.176	85.0702
FBgn0003502	Btk29A	105.109	36.4403	26.8203	31.207	13.2308	9.34351	854.402
FBgn0033987	ckn	104.673	49.0463	47.507	37.6992	42.5269	24.6571	12.7146
FBgn0001083	fw	104.652	46.8863	70.7419	38.0553	33.5561	20.8051	8.98669
FBgn0263598	Vha68-2	104.316	159.427	138.912	159.306	389.941	699.643	518.832
FBgn0000568	Eip75B	104.176	57.5214	30.006	48.1279	70.3845	59.1162	411.601
FBgn0031195	CG17600	104.005	207.783	173.465	92.4899	92.9141	114.529	49.7252
FBgn0030484	GstT4	103.966	10.575	72.1412	167.868	211.104	86.2974	26.8135
FBgn0004646	ogre	103.184	173.527	221.783	287.933	514.641	335.696	108.628
FBgn0046258	CG12880	103.174	15.0631	132.065	6.74127	13.6109	9.40812	1.47987
FBgn0004907	14-3-3zeta	103.049	144.36	240.78	303.821	396.473	573.018	1012.66
FBgn0035121	Tudor-SN	103.023	64.2317	45.0233	41.8781	26.4011	11.9059	5.72597
FBgn0033313	Cirl	102.964	70.9697	65.1766	45.298	35.7145	35.6455	65.2854
FBgn0038947	Sar1	102.817	109.644	67.2703	66.2356	57.6559	62.3804	324.332
FBgn0263120	Acsl	102.462	15.5493	10.3668	9.75838	6.03486	23.9749	182.241
FBgn0038017	CG4115	102.306	147.796	7.45954	1.15237	1.83714	7.22013	7.7116
FBgn0038145	Droj2	102.098	73.0908	92.9898	98.4373	96.1427	85.0173	138.656
FBgn0020255	Ran	101.936	33.4109	28.9934	44.4769	47.8018	34.1919	20.4014
FBgn0259984	kuz	101.738	19.0374	14.9556	10.4804	7.73212	5.14141	4.49049
FBgn0000250	cact	101.684	83.4668	44.9062	28.6085	26.4496	133.099	768.902
FBgn0003660	Syb	101.628	148.886	113.207	122.909	134.816	167.934	172.623
FBgn0264493	rdx	101.614	97.905	37.6993	29.3105	28.9265	78.7561	274.178
FBgn0027108	Inx2	101.285	155.625	229.357	250.73	379.402	242.775	90.5971
FBgn0035423	CG17737	101.202	142.822	120.039	108.264	124.396	141.004	89.7897
FBgn0031001	CG7884	101.139	50.0874	1.06262	0.118409	0.110031	0.0952487	4.1731
FBgn0001224	Hsp23	100.658	34.665	61.1401	14.4993	21.5972	4.95035	1.97245
FBgn0002921	Atpalpha	100.274	78.9043	117.145	155.946	155.01	282.844	687.933
FBgn0038570	Prx5	100.04	141.091	14.2862	29.9085	42.165	34.2314	25.3441
FBgn0032864	CG2493	100.035	53.3637	35.261	30.6473	21.8734	19.9172	11.0452
FBgn0261458	capt	99.8895	22.9937	55.8662	80.142	117.379	148.884	129.251
FBgn0266526	CG45093	99.8606	54.6131	148.133	117.815	70.9611	36.8835	13.0237
FBgn0003328	scb	99.5239	42.7684	33.9758	8.19639	12.5584	18.2421	262.208
FBgn0003090	pk	99.3466	72.4652	44.4645	18.7641	2.77935	25.9739	32.5777
FBgn0039852	nyo	99.0809	3.7057	3.24722	0.326996	0.928388	0.214964	0.117049
FBgn0028399	TMS1	98.7208	71.8684	70.9078	77.5628	70.7825	49.3188	49.0275
FBgn0264894	CG44085	98.6871	234.97	10.9608	0.777685	0.792894	6.01359	988.307
FBgn0035056	spz6	98.6484	19.7129	1.66476	4.78541	0.1362	0.147486	0.0833283
FBgn0045823	vsg	98.3759	152.172	193.089	112.715	111.047	110.268	101.578
FBgn0027611	LM408	98.1803	1.39573	5.3188	3.07783	2.06464	3.31103	4.23799
FBgn0039928	Cals	97.8235	65.2469	52.661	40.4016	44.4839	41.4983	31.3788
FBgn0037911	CG10898	97.749	13.4106	15.5815	41.9643	29.6329	10.0544	4.0792
FBgn0039043	CG17121	97.0716	27.6573	63.4923	78.9254	108.905	61.2982	22.5343
FBgn0023441	fus	96.7785	78.902	58.7968	36.0538	24.06	17.8185	14.3119
FBgn0003089	pip	96.3838	783.386	332.965	377.187	205.127	44.9121	19.6695
FBgn0015834	Trip1	96.2932	68.8815	73.3519	64.6698	44.7992	45.5762	50.5413
FBgn0264489	CG43897	96.2339	45.8778	19.3664	42.445	122.239	311.417	259.82
FBgn0250839	CG2016	96.2082	1.23995	0.877221	1.02693	0.204115	0	0.179364
FBgn0027356	Amph	96.0619	22.3321	70.2418	152.69	190.153	73.3807	40.1319
FBgn0037843	CG4511	95.9819	16.0569	115.51	160.801	162.709	87.3246	18.883
FBgn0038535	alt	95.673	56.7622	23.8855	22.6685	17.0306	9.37952	41.8611
FBgn0259923	2015-09-04	95.5038	27.3065	5.35185	7.98479	7.53539	9.785	6.96265
FBgn0004587	B52	95.4682	40.6121	25.1824	24.3287	26.2594	19.4923	9.05614
FBgn0034583	CG10527	95.4464	19.4803	102.435	559.601	835.06	771.05	368.227
FBgn0000667	Actn	95.3259	182.712	86.4378	40.5557	15.4381	9.03565	12.4848
FBgn0038073	CG14395	95.1487	12.8377	5.2883	8.39436	0.721701	0.0818538	0.109335
FBgn0051559	CG31559	94.7378	109.872	3.73564	2.22113	0.288232	0.0583628	0.215213
FBgn0022987	qkr54B	94.624	30.427	18.5917	12.7009	12.3771	8.44356	5.64374
FBgn0034237	eIF3-S9	93.8944	44.7343	60.8686	34.9765	24.5946	23.5294	20.0185
FBgn0015737	Hmu	93.7256	20.3587	18.1146	41.0183	35.2479	24.1945	10.1527
FBgn0001234	Hsromega	93.7146	44.6147	20.5594	21.6224	18.0057	50.7794	86.703
FBgn0259167	CG42272	93.5511	88.662	10.9124	8.95406	4.76952	8.23209	11.015
FBgn0001291	Jra	93.3579	58.8521	45.1439	34.4305	37.6912	44.26	52.3255
FBgn0266756	btsz	92.8867	50.4336	47.5797	35.8889	23.1581	20.7424	29.0084
FBgn0019947	Psn	92.5807	49.1477	18.2299	17.3253	20.6122	22.062	33.1142
FBgn0014073	Tie	92.3709	159.691	73.1399	69.1623	47.3083	19.0971	9.29467
FBgn0039304	CG10425	92.0203	22.601	16.7156	14.2195	11.8348	8.38541	6.9299
FBgn0027590	GstE12	91.9667	67.0927	139.587	120.599	160.428	135.879	82.6852
FBgn0262867	Ptr	91.5751	83.6774	11.2974	1.34711	3.9998	1.86514	2.06151
FBgn0035871	BI-1	90.8566	120.991	82.2479	69.3605	66.375	83.7724	75.2943
FBgn0034997	CG3376	90.7803	93.9507	27.9884	8.2108	3.10941	1.33255	7.87495
FBgn0260450	CalpC	90.7729	36.2417	19.2618	19.5362	20.9751	25.9422	26.2956
FBgn0028394	CG17834	90.6831	64.7636	54.9172	65.2164	85.6546	134.42	154.166
FBgn0038476	kuk	89.8677	31.8341	16.1939	5.01289	2.24743	1.46143	16.908
FBgn0010217	ATPsyn-beta	89.6071	328.572	167.544	138.827	182.183	203.519	118.64
FBgn0035165	CG13887	89.5776	130.023	78.791	63.8774	63.8647	57.7076	46.746
FBgn0000635	Fas2	89.4503	50.7344	50.8779	46.6139	36.5952	24.1991	32.3481
FBgn0045866	bai	88.9531	111.116	48.7034	38.2156	33.9234	38.9085	28.3302
FBgn0031645	CG3036	88.9046	10.3368	12.3377	6.60325	8.59019	34.3751	501.333
FBgn0037468	CG1943	88.3739	187.426	149.457	262.71	168.564	158.839	123.6
FBgn0034345	CG5174	88.2487	40.3548	59.8795	47.6166	42.195	54.5947	57.8117
FBgn0031418	CG3609	88.2021	24.7821	46.0623	33.1287	31.5648	21.449	54.4933
FBgn0020503	CLIP-190	88.1318	39.9585	210.866	42.3798	107.187	258.537	240.096
FBgn0033919	CG8547	87.8586	52.3716	28.7926	30.0667	190.605	1014.95	695.556
FBgn0264294	Cyt-b5	87.3159	82.659	82.8601	125.511	134.267	341.643	585.947
FBgn0039172	Spase22-23	87.3067	57.0365	36.8513	35.3367	30.2939	20.4044	13.3659
FBgn0036351	CG14107	87.1965	1.42993	1.05972	0	0	0	0
FBgn0011591	fng	87.0739	134.404	140.157	97.2336	40.7548	12.0249	202.81
FBgn0000546	EcR	86.9087	7.21131	17.6705	18.563	19.1662	13.5862	4.15785
FBgn0022023	eIF-3p40	86.8595	79.3039	95.098	95.1368	71.5313	79.8483	109.967
FBgn0032694	MESR3	86.495	19.7305	22.2658	5.04224	18.7886	82.2665	138.525
FBgn0028546	ics	85.9726	91.2049	89.3334	133.653	148.507	171.199	116.489
FBgn0027095	Manf	85.7111	44.7918	23.0208	16.2483	7.85546	2.40006	2.31199
FBgn0250785	vari	85.6424	178.266	206.378	183.356	127.815	70.6651	45.9723
FBgn0033446	CG1648	85.5987	72.2817	140.711	161.778	202.797	232.42	184.485
FBgn0027835	Dp1	85.5479	69.2413	39.2226	23.3684	12.2719	7.35139	6.69895
FBgn0038420	CG10311	85.1961	47.716	144.489	73.2561	169.155	469.433	272.442
FBgn0039728	CG7896	84.9921	32.7752	38.927	18.1607	3.23942	0.947578	2.0002
FBgn0000416	Sap-r	84.9379	141.743	148.843	119.347	121.499	120.109	134.608
FBgn0004177	mts	84.708	85.2617	68.7769	67.2616	72.4677	100.873	179.359
FBgn0261555	CG42673	84.5864	3.70952	7.00918	3.45861	1.08442	72.7887	147.205
FBgn0027335	Rip11	84.5252	37.296	41.0214	30.5532	35.3078	118.345	206.867
FBgn0011289	TfIIA-L	84.3666	38.1515	20.346	26.6249	24.565	22.7321	30.6029
FBgn0038751	CG4770	84.3554	550.003	68.8786	0.289321	0.24238	0.051738	0.263083
FBgn0032598	ChLD3	84.2886	247.289	336.28	33.7367	6.17068	0.643249	0.311503
FBgn0000244	by	84.2316	22.4057	68.8239	89.8632	117.464	140.966	92.2564
FBgn0036433	CG9628	83.9626	181.716	385.669	242.782	156.386	62.6963	20.406
FBgn0020236	ATPCL	83.9274	36.9628	34.0524	22.2739	20.0905	18.5227	10.9039
FBgn0025683	CG3164	83.6156	212.134	142.849	74.3136	83.1019	87.1456	544.138
FBgn0027932	Akap200	83.6126	29.558	65.9819	64.9042	25.072	13.3678	65.8661
FBgn0033451	CG1665	83.5582	25.7758	26.6794	19.8309	10.4316	2.74612	1.3348
FBgn0010222	Nmdmc	82.3419	40.871	20.7813	9.97118	4.84513	3.19792	4.25001
FBgn0002306	sas	82.1545	377.865	173.565	143.381	76.0433	25.2736	17.7346
FBgn0037443	Dmtn	82.0013	19.8984	17.2514	11.0308	6.21363	9.60561	449.332
FBgn0035089	Phk-3	81.9369	1556.77	1110.58	50.7527	6.42833	1.02126	5.38149
FBgn0010352	Nc73EF	81.8625	85.2137	99.8387	70.5734	127.299	124.631	57.9503
FBgn0013305	Nmda1	81.8545	91.7078	57.3405	42.3302	56.6525	83.0867	75.6929
FBgn0031489	CG17224	81.7002	3.12202	2.44332	3.20134	2.594	2.60885	1.95537
FBgn0260934	par-1	81.6805	72.3683	68.1508	54.3666	52.2748	115.387	725.965
FBgn0004657	mys	81.6684	65.2392	91.8323	104.729	124.318	122.628	221.193
FBgn0033691	CG8860	81.5624	68.6175	48.4124	31.4179	22.4864	17.0893	5.83139
FBgn0004921	Ggamma1	81.5607	96.5205	85.1579	109.066	169.223	137.424	101.926
FBgn0034966	CG13563	81.4667	0.555526	0	0.0702396	0.111864	0.69057	0.350564
FBgn0024957	Irp-1B	81.2962	71.2726	67.4333	60.0714	50.6043	41.7414	13.2201
FBgn0004103	Pp1-87B	81.2322	84.8392	59.6903	65.0954	78.87	101.897	77.295
FBgn0002733	E(spl)mbeta-HLH	80.9066	32.9311	112.672	98.0323	51.1414	13.7408	17.0045
FBgn0041630	Hexo1	80.8371	33.6043	21.6163	23.9211	30.8522	36.1357	36.2117
FBgn0038659	EndoA	80.734	4.995	6.14712	7.07096	8.98641	15.2252	10.9436
FBgn0037671	VhaM8.9	80.661	80.829	77.0658	92.9503	265.398	522.84	509.88
FBgn0004868	Gdi	80.5734	84.274	101.816	96.6667	102.635	64.0008	27.6479
FBgn0032681	CG10283	80.4583	5.44346	14.9638	13.1703	18.6481	15.6662	26.9264
FBgn0040321	GNBP3	80.4534	1.75769	2.7763	10.9068	8.48261	3.84224	10.0948
FBgn0003716	tkv	79.9871	81.8608	114.688	61.5883	70.4288	68.4576	24.0621
FBgn0024814	Clc	79.9574	91.5734	77.257	90.783	100.121	104.794	89.3026
FBgn0029629	CG8636	79.7958	60.4779	71.2618	55.2257	50.9184	72.5951	105.944
FBgn0003462	Sod	79.4115	102.519	61.2061	70.7964	116.269	172.903	161.259
FBgn0035772	Sh3beta	79.2859	85.2338	60.6938	67.6101	68.8813	77.2348	153.622
FBgn0029903	pod1	78.8791	18.0748	7.66708	10.2214	7.6809	3.49092	3.5636
FBgn0086368	tw	78.8363	19.226	10.6676	2.17789	0.787822	0.705508	0.32889
FBgn0034802	CG3800	78.5641	37.4463	33.5541	35.8169	52.9066	35.0329	22.3767
FBgn0267385	PyK	78.4145	50.2034	176.842	46.0251	85.1326	200.212	517.434
FBgn0016119	ATPsyn-Cf6	78.392	116.153	66.8697	67.311	79.3525	90.3283	77.9856
FBgn0035555	CG13720	78.0175	35.8447	0.0744861	0.090639	0	0.0492219	3.0483
FBgn0265192	Snp	77.5919	62.3051	8.57036	9.21612	10.2088	12.4134	21.059
FBgn0266696	CG45186	77.4126	161.489	100.626	54.2766	62.9737	103.882	109.005
FBgn0038065	Snx3	77.3056	67.3367	37.9075	41.2881	45.3074	35.5065	55.7815
FBgn0022355	Tsf1	77.2984	5.65009	8.56611	0.631591	1.71548	4.73825	4.96706
FBgn0010415	Sdc	77.2235	36.5586	42.8375	38.1958	36.0737	35.056	31.0323
FBgn0037235	CG1103	77.1887	29.7136	18.0551	23.877	18.0058	15.5046	25.3798
FBgn0035438	PHGPx	77.1444	33.0046	32.7058	30.0576	128.312	173.875	66.7902
FBgn0030350	SelG	76.8938	47.7243	83.735	96.8355	101.139	82.5256	59.0748
FBgn0025373	Fpps	76.8272	4.18966	2.31591	4.10697	22.3632	16.8469	13.922
FBgn0030683	CG8239	76.8181	4.31047	3.49224	3.06165	2.037	1.98153	1.51083
FBgn0020653	Trxr-1	76.6707	107.801	60.0135	39.7391	48.5654	42.0252	25.3063
FBgn0015024	CkIalpha	76.5814	72.6284	61.2303	68.099	96.1108	142.865	158.396
FBgn0025352	Thiolase	76.3768	50.1986	45.0483	25.4779	27.6543	35.7249	30.547
FBgn0014380	RhoL	76.3481	196.166	32.0616	12.412	31.7166	60.8527	29.4382
FBgn0039272	CG11836	76.1807	1.36477	0.947906	0.691868	0.624647	0.509659	0.127469
FBgn0032394	CG6746	76.0535	24.5386	14.3312	13.8236	18.757	24.5541	15.4401
FBgn0030245	CG1637	75.9363	63.2355	54.9482	34.1156	31.583	64.1979	100.475
FBgn0250869	CG42240	75.8006	40.8552	32.2768	41.7867	120.389	247.326	98.7125
FBgn0004456	mew	75.7109	51.3252	21.0538	3.13969	2.13794	4.66259	3.26084
FBgn0023023	CRMP	75.63	156.642	78.1998	28.8634	17.2604	9.55153	41.1215
FBgn0032618	CG31743	75.5925	15.169	12.8261	43.0427	53.2513	42.8163	44.6972
FBgn0020496	CtBP	75.541	87.4409	50.6064	29.0881	31.4647	37.0261	67.3172
FBgn0265434	zip	75.4053	70.8088	336.899	917.642	1756.4	2639.29	1625.47
FBgn0087035	AGO2	75.3768	61.6059	69.1805	55.5861	65.4568	77.6459	51.2149
FBgn0030805	wus	75.1243	8.13425	6.8935	3.93921	2.57254	1.75438	0.918757
FBgn0037645	CG11966	74.6814	9.02015	0.655373	5.88623	0.0133985	0.0263874	0.0662962
FBgn0052230	CG32230	74.6586	248.434	133.99	83.8647	85.7744	124.084	121.742
FBgn0035020	CG13585	74.4417	77.3301	84.5723	65.7011	55.5754	50.8764	61.3061
FBgn0265413	CG44325	74.2906	32.5391	302.932	238.731	590.663	1510.54	1086.38
FBgn0038385	CG4221	74.282	53.3677	58.7401	30.9369	18.317	14.0045	21.0808
FBgn0052412	QC	74.2249	111.377	32.5342	59.3222	15.8521	19.1488	141.845
FBgn0267534	CR45874	74.1397	69.5138	68.6648	44.2331	35.2797	27.4782	44.851
FBgn0052865	alphagamma-element:CR32865	74.0309	23.0085	22.4963	6.60954	3.663	0.636215	0.230785
FBgn0010504	kermit	73.7828	9.98997	6.9897	8.34701	4.28662	1.90287	3.93938
FBgn0012037	Ance	73.7263	1.72993	133.34	165.25	255.83	267.151	451.031
FBgn0019624	CoVa	73.5933	176.632	90.1142	84.3111	100.969	129.16	113.073
FBgn0030876	CG6762	73.546	72.2533	47.1156	11.7727	6.69969	5.41137	6.70233
FBgn0029170	TwdlT	73.5109	2760.06	1388.7	469.329	145.716	24.8176	6.44994
FBgn0029093	cathD	73.4913	33.7509	48.5465	44.5885	39.3972	62.4089	74.8965
FBgn0001226	Hsp27	73.4826	15.7971	56.1267	35.9436	34.7889	3.19585	3.32267
FBgn0261260	mgl	73.4349	24.933	13.0364	9.52082	16.0129	22.6041	19.9501
FBgn0027066	Eb1	73.2701	53.4603	56.6382	37.3614	50.0579	49.6812	35.5434
FBgn0037607	CG8036	73.1422	54.6239	65.4212	25.8338	22.4831	19.844	22.9534
FBgn0266375	IP3K2	73.1162	115.882	71.7599	45.3648	37.9183	23.0171	9.50315
FBgn0261526	NT1	72.8318	3.15917	2.39413	1.9125	0.46372	0.0452137	0.342009
FBgn0032803	CG13082	72.7429	0.591675	0.122218	0.0391554	0.0626714	17.7122	316.153
FBgn0036974	eRF1	72.595	64.9773	59.0834	47.6849	43.8391	67.5187	73.2519
FBgn0003888	betaTub60D	72.4117	5.32738	24.1668	207.629	507.576	440.081	154.303
FBgn0263216	CG43386	71.72	908.781	460.193	490.472	737.53	347.095	76.786
FBgn0003475	spir	71.6491	20.5212	28.4691	9.3854	14.2541	16.7974	12.9428
FBgn0040064	yip2	71.4365	38.607	52.7463	38.3118	32.6807	25.4247	19.1695
FBgn0035103	Vdup1	71.429	642.315	306.987	274.661	269.545	247.145	518.997
FBgn0039494	grass	71.4275	4.42471	10.1419	4.79077	4.08078	9.28037	106.337
FBgn0261547	Exn	71.0812	87.77	57.4979	43.4681	38.9494	50.5715	114.214
FBgn0039244	CG11069	71.0767	38.1098	36.3582	33.7207	14.6028	8.65025	7.70953
FBgn0033906	CG8331	70.9322	124.118	66.7319	41.6252	59.9991	138.036	216.085
FBgn0004401	Pep	70.7482	40.5381	34.6583	38.2698	32.9354	26.2692	20.2993
FBgn0263346	CG43427	70.5889	136.338	106.401	34.3253	24.3801	56.2793	122.087
FBgn0002643	mam	70.5073	13.8761	27.9042	17.7173	8.36908	6.71354	63.9576
FBgn0031285	CG3662	70.3463	67.467	63.6051	71.064	73.549	75.6272	61.7673
FBgn0028670	Vha100-2	70.3269	87.294	107.453	93.7808	240.59	456.124	372.924
FBgn0030306	Spase25	70.3111	51.8553	29.7172	24.0707	16.4401	10.7681	5.21705
FBgn0030086	CG7033	70.2079	18.5131	68.9746	106.953	132.858	86.6694	31.4266
FBgn0039830	CG1746	70.0943	500.476	176.364	163.438	249.227	250.678	132.756
FBgn0038981	CG5346	70.0791	25.5429	25.5113	13.5304	11.548	74.5527	298.706
FBgn0260439	Pp2A-29B	69.9157	84.7339	77.0065	85.2724	90.5933	105.063	72.4316
FBgn0020660	eIF-4B	69.8112	77.4998	41.9355	41.0882	54.0656	72.7758	96.5153
FBgn0000319	Chc	69.7269	85.4319	45.0813	40.6991	53.0415	73.6273	69.353
FBgn0026879	CG13364	69.5367	67.3431	77.6936	78.3583	99.3774	121.785	86.7138
FBgn0263873	sick	69.5258	39.6395	46.6278	28.2111	21.8306	25.6139	17.3328
FBgn0011768	Fdh	69.5216	9.3717	9.53176	23.3215	35.1605	36.1462	20.1779
FBgn0037094	CG7611	69.2788	37.0968	27.8267	28.0635	25.703	36.5802	90.807
FBgn0035471	Sc2	69.2764	21.1029	19.0045	19.1179	16.514	16.9071	10.7606
FBgn0014032	Sptr	68.9436	21.5059	14.4661	11.559	14.3259	17.5165	13.54
FBgn0035771	Sec63	68.883	40.7645	26.0584	23.6483	22.9236	14.176	12.7877
FBgn0035909	ergic53	68.7675	62.1509	29.8028	21.1782	13.1633	7.21059	3.90213
FBgn0263929	jvl	68.6742	29.0996	55.3035	34.991	16.2016	15.7967	21.6625
FBgn0085427	CG34398	68.5835	246.839	86.2062	16.0629	16.019	8.99987	5.10158
FBgn0030595	CG14406	68.5457	4.60091	23.8981	150.076	145.996	88.9308	55.3079
FBgn0052423	shep	68.5321	16.9965	17.8741	33.87	38.8724	32.0082	24.9874
FBgn0052103	CG32103	68.4733	32.6358	34.6369	24.1901	20.8141	20.2223	75.018
FBgn0039406	RpL34a	68.2033	103.355	96.6804	65.7702	52.6168	47.3061	50.4358
FBgn0010434	cora	67.9046	66.2357	170.339	262.949	362.564	227.725	146.658
FBgn0033362	CG8172	67.6378	18.6839	33.532	20.9717	4.74497	0.545184	0.261269
FBgn0003292	rt	67.6226	88.6543	39.0152	17.8108	0.87614	0.0715426	0.491551
FBgn0034253	CG10936	67.5215	186.271	67.5686	30.0176	9.38514	5.22213	3.33833
FBgn0005671	Vha55	67.5211	99.436	101.989	138.984	365.146	712.419	514.823
FBgn0038439	Cad89D	67.123	91.3709	4.98173	0.218697	0.0905972	0.257421	0.342582
FBgn0040529	CG9603	67.0738	153.749	119.194	86.5957	135.36	158.178	105.783
FBgn0037164	CG11438	67.0242	5.52239	2.95276	5.4438	3.98601	1.80727	3.33518
FBgn0031148	Cbs	66.9913	25.6655	23.9401	17.6339	4.69903	0.709255	10.1867
FBgn0037636	CG9821	66.9754	56.4723	56.325	44.4719	52.0752	44.418	85.0548
FBgn0037009	CG5104	66.8418	55.8196	49.192	64.376	66.1832	56.9723	38.762
FBgn0026418	Hsc70Cb	66.788	63.3295	53.1081	64.8175	161.922	262.019	132.314
FBgn0263391	hts	66.5122	58.3028	113.505	127.243	118.554	71.7327	38.7066
FBgn0030051	spirit	66.4537	8.79691	15.4227	3.24777	2.4742	2.58912	2.40746
FBgn0040340	TRAM	66.4357	78.2959	34.5277	24.908	15.7704	7.48718	3.94709
FBgn0014018	Rel	66.4112	43.7311	31.2709	12.6043	13.6006	24.8887	45.116
FBgn0037270	CG9769	66.1631	70.0056	78.6646	70.0947	63.3152	66.5027	104.016
FBgn0262801	twr	66.1178	61.8894	32.1482	21.6767	22.6046	16.558	7.72317
FBgn0016754	sba	66.1063	36.4624	17.6632	16.6166	17.3705	24.1844	10.8296
FBgn0033032	kune	66.0956	102.015	125.247	146.332	136.793	73.7878	43.8771
FBgn0086676	spin	65.9588	55.4462	44.9278	14.0455	12.6979	11.6982	39.2862
FBgn0041092	tai	65.8997	2.18011	10.4973	18.6451	23.046	35.9742	18.5697
FBgn0037240	Cont	65.8746	78.4972	130.415	158.728	149.155	83.8654	32.3744
FBgn0085446	CG34417	65.8154	11.1448	29.8679	302.108	1402.24	3663.34	1766.95
FBgn0031464	Duox	65.6901	31.1908	123.998	255.185	340.536	212.099	53.4564
FBgn0032820	fbp	65.647	40.8414	5.92649	1.91049	0.837647	0.463274	0.263739
FBgn0038603	PKD	65.597	11.29	13.7153	8.47933	7.69252	6.06546	48.3182
FBgn0034902	CG5532	65.5243	56.1831	105.258	66.0293	50.3409	57.1331	82.0455
FBgn0001222	Hsf	65.5012	23.5167	26.3166	18.0431	25.9138	14.447	10.7316
FBgn0261509	haf	65.4872	271.392	154.152	90.6075	19.0966	25.7122	51.6096
FBgn0267768	CR46099	64.8183	15.0366	14.139	11.7031	6.65533	6.44424	4.47793
FBgn0034091	mrj	64.7386	26.8042	21.6737	30.168	8.4264	15.7382	332.284
FBgn0030364	CG15735	64.7146	31.8761	29.4526	17.0322	18.0886	22.7271	42.9344
FBgn0085188	CG34159	64.427	48.7208	37.1312	35.6251	30.5759	25.8119	37.1272
FBgn0003435	sm	64.4218	207.985	70.4589	168.451	218.679	139.478	40.5364
FBgn0029506	Tsp42Ee	64.3592	2326.89	288.746	357.337	405.787	849.066	911.523
FBgn0052499	Cda4	64.2415	1258.5	188.104	54.6048	6.53417	13.2089	92.1564
FBgn0037756	CG8507	64.1898	63.7356	32.4436	29.9687	26.6398	34.3794	113.471
FBgn0035630	CG10576	63.7012	74.2079	33.3938	22.7967	18.5274	12.8128	8.07532
FBgn0267504	28SrRNA:CR45844	63.5537	63.201	67.9619	60.5535	60.4684	95.4862	114.798
FBgn0001258	ImpL3	63.3471	36.0736	18.4881	27.9582	167.712	97.8955	466.978
FBgn0015324	Vha26	63.3333	86.9868	81.8029	131.656	375.463	741.002	563.548
FBgn0038349	AOX3	63.2091	11.4822	71.5082	45.694	59.5953	46.0573	23.2648
FBgn0012051	CalpA	63.0425	20.3843	40.687	30.2492	31.7564	51.652	103.683
FBgn0250871	pot	62.9485	150.547	225.085	216.101	186.168	196.696	404.532
FBgn0029134	Prosbeta5	62.9388	29.7255	28.0185	73.5349	59.5928	75.1084	65.5877
FBgn0027619	Adam	62.8411	73.9121	38.5357	32.5017	39.9799	54.1496	69.914
FBgn0061492	loj	62.8352	78.8838	38.8806	21.1208	13.2088	8.48885	5.27831
FBgn0026374	Rhp	62.7954	48.7552	28.0447	24.1596	21.8213	21.9733	44.8795
FBgn0034398	CG15098	62.7712	70.379	77.856	87.9599	92.6845	94.9651	71.6693
FBgn0052982	CG32982	62.7237	196.486	46.3869	148.36	250.443	431.678	814.866
FBgn0037249	eIF3-S10	62.5856	46.4477	43.017	34.8057	28.5523	37.4789	40.3252
FBgn0036844	Mkp3	62.5016	31.1195	22.6029	11.0766	9.49513	23.5216	418.373
FBgn0250838	CG30415	62.3163	109.952	50.017	53.9597	62.4871	68.4643	48.4067
FBgn0004893	bowl	62.2199	29.4592	26.2479	27.8489	23.326	7.81214	3.89573
FBgn0040491	Buffy	62.0987	23.4412	73.6425	69.35	34.0676	24.5143	57.9093
FBgn0263593	Lpin	62.032	47.9754	30.9739	14.4227	5.57085	5.68984	20.8511
FBgn0040817	CG14132	61.9897	25.5297	8.76384	17.2875	63.3984	132.484	68.3935
FBgn0040777	CG14767	61.9741	62.6807	58.8592	69.7125	78.8934	115.943	85.9894
FBgn0036928	Tom20	61.9406	95.6628	54.5521	38.217	39.8133	46.9724	36.7104
FBgn0027094	Aats-ala	61.6973	29.9769	18.5696	12.6189	10.5832	7.46527	3.90229
FBgn0028662	VhaPPA1-1	61.6954	78.6254	78.8696	99.4165	245.252	460.609	348.289
FBgn0062978	CG31808	61.4707	9.95949	16.8296	216.039	445.781	497.234	241.86
FBgn0058160	CG40160	61.3854	82.4771	39.2694	34.6493	24.3668	35.3211	37.5581
FBgn0015622	Cnx99A	61.3698	45.332	36.8801	50.9066	45.0482	25.5655	14.2686
FBgn0032444	CG5525	61.1109	26.1172	88.9694	159.79	194.912	94.0379	26.4655
FBgn0034985	CG3328	61.095	46.0039	54.7927	40.579	19.6988	9.28809	7.62638
FBgn0259749	mmy	60.9589	114.01	89.3152	58.77	29.8131	20.5495	60.4762
FBgn0003371	sgg	60.862	90.9287	46.2248	32.5976	26.8998	26.8631	129.052
FBgn0041629	Hexo2	60.8184	14.6706	12.7514	7.15538	3.76418	2.39576	0.814781
FBgn0035428	CG14960	60.6957	1.16759	7.96638	1.73865	0.879413	0.0809561	0.10844
FBgn0035601	Uev1A	60.6132	36.2357	36.5102	46.6258	62.8504	40.1709	23.9027
FBgn0015791	Rab14	60.6069	33.9544	31.04	26.5287	27.5303	29.8283	37.5031
FBgn0051155	Rpb7	60.5209	13.1477	7.24495	6.14035	8.7878	3.18773	2.27178
FBgn0024811	Crk	60.4635	92.0375	50.3119	41.6027	39.1993	42.7206	34.1363
FBgn0010909	msn	60.3671	48.2076	60.8286	46.7856	42.7152	34.2339	51.3936
FBgn0029836	CG5928	60.1603	1041.7	523.748	82.2809	34.4833	3.78291	0.194258
FBgn0030763	CG9782	60.0869	59.0439	198.982	651.856	211.314	130.927	112.564
FBgn0030884	CG6847	59.9635	87.4873	36.0986	24.7259	25.0538	6.24189	1.38769
FBgn0016700	Rab1	59.8441	70.9152	58.2286	62.3532	73.754	150.315	266.964
FBgn0003319	Sb	59.8008	11.9831	38.3399	11.4222	7.66128	5.82834	1.4872
FBgn0263102	psq	59.7086	20.2628	12.1675	6.9256	5.94907	5.83816	10.6897
FBgn0014868	Ost48	59.6402	15.0569	14.6947	11.6561	10.8923	6.23631	3.76899
FBgn0265137	Spn42Da	59.5513	54.3239	12.9204	7.22017	5.09405	12.9385	23.6454
FBgn0032811	CG10268	59.5041	17.6269	11.2759	4.5826	2.00601	2.34207	2.7107
FBgn0030251	CG2145	59.4766	36.6551	25.2834	29.9799	69.1606	202.304	125.952
FBgn0010341	Cdc42	59.4293	57.0052	55.8636	67.5272	87.8407	70.6489	58.7532
FBgn0016797	fz2	59.2595	54.6382	73.2996	64.4521	67.0451	27.8707	10.3677
FBgn0003975	vg	59.2165	35.0179	28.4186	15.1271	11.4085	10.6957	22.9383
FBgn0040397	CG3655	59.2124	3.63441	13.0173	12.3247	14.8486	39.3157	53.2238
FBgn0016687	Nurf-38	59.1708	32.1402	38.1978	38.2319	31.814	25.7797	19.5762
FBgn0085234	CG34205	59.0656	320.194	49507.7	49086.1	30051.3	15002.6	4326.87
FBgn0041713	yellow-c	58.8432	66.8756	97.3326	751.321	718.98	127.576	104.742
FBgn0030529	Clic	58.836	32.4807	22.8791	46.4135	155.048	313.269	235.602
FBgn0038803	CG5191	58.7416	64.8026	218.236	305.871	94.9931	49.3061	32.4079
FBgn0038984	AdipoR	58.709	33.2843	39.8681	39.2934	40.9865	52.1631	47.5907
FBgn0036258	CG5642	58.6922	42.7226	55.5608	46.5728	41.36	57.9061	75.4791
FBgn0039056	CenB1A	58.4261	15.8537	9.23437	8.72657	8.67159	9.36731	24.4546
FBgn0004583	ex	58.239	38.2231	44.0897	33.1028	21.3929	13.439	8.12636
FBgn0261570	CG42684	58.2367	40.1436	23.5214	11.1081	8.75468	7.57462	12.73
FBgn0038682	CG5835	58.1817	12.6221	19.1751	16.8986	74.2126	166.362	112.002
FBgn0003206	Ras64B	58.0458	85.9661	70.0615	124.01	217.193	206.236	140.921
FBgn0036198	crim	57.9016	63.1875	94.3172	109.343	81.5898	43.6203	16.4413
FBgn0051121	CG31121	57.8942	21.1446	25.4055	27.9656	8.60897	4.5518	2.36286
FBgn0025366	Ip259	57.8649	51.7979	97.2753	62.8886	47.0067	63.4369	98.3344
FBgn0036116	CG7888	57.7226	80.074	73.9909	44.35	37.4761	17.9808	23.645
FBgn0015777	nrv2	57.672	56.5508	79.4602	90.1823	66.7811	47.0011	68.8991
FBgn0032704	Jwa	57.5211	60.7298	47.8152	38.5448	45.7018	61.7308	42.0892
FBgn0050440	CG30440	57.2868	49.9013	20.2641	5.03237	1.75241	0.883074	11.9967
FBgn0261014	TER94	57.2494	34.8413	46.089	85.1006	77.1435	84.0801	51.1566
FBgn0259214	PMCA	57.1781	179.899	119.63	136.643	155.542	162.342	127.764
FBgn0002719	Men	57.1158	179.109	60.7841	19.8536	38.5998	288.945	271.405
FBgn0031374	CG7337	57.0589	53.0256	30.7562	37.4716	37.0842	40.1865	131.007
FBgn0051475	CG31475	56.9904	95.2293	39.6153	26.8051	12.9021	23.0093	120.584
FBgn0262029	d	56.9197	27.5019	45.3304	10.0289	4.37333	2.96175	1.61857
FBgn0033732	CG13157	56.9079	8.47509	14.2838	1.44239	0	0.0425262	0.0720807
FBgn0003731	Egfr	56.7961	31.497	36.0494	23.7758	22.2786	14.0803	16.2962
FBgn0037420	CG15597	56.7106	0.417425	0.180456	0.439178	0.29634	0	0
FBgn0262617	CG43143	56.5838	91.8168	10.0173	8.48723	4.90779	1.85051	6.48274
FBgn0250907	Cht3	56.4002	12.8885	18.3662	3.77639	0.805972	0.969521	1.15728
FBgn0037930	CG14715	56.3847	25.5721	8.34075	6.64653	7.80331	7.37824	3.55196
FBgn0265998	Doa	56.3081	37.0123	15.7469	11.6175	10.9629	13.3698	493.933
FBgn0031066	CoVIb	56.3072	263.561	110.261	87.8719	122.293	140.025	148.994
FBgn0025682	scf	56.2508	83.8783	54.0469	32.9537	17.7992	6.86418	8.02958
FBgn0004362	HmgD	56.1575	39.6596	48.4991	12.8814	3.39472	0.796029	4.34507
FBgn0259740	CG42394	56.1232	20.3126	18.4463	12.0478	4.4479	2.84419	78.2164
FBgn0023175	Prosalpha7	56.0817	23.9571	27.7389	62.6225	67.6228	72.1586	52.4523
FBgn0030318	rho-4	56.0709	101.543	179.52	128.02	150.442	133.128	58.0747
FBgn0036111	Aps	56.0251	42.157	31.0212	38.6251	37.8636	33.9508	64.8687
FBgn0036449	bmm	56.024	25.9875	26.0535	5.57149	4.95788	3.18967	6.47888
FBgn0028622	qsm	56.0149	569.429	346.155	72.6901	94.9523	127.509	199.745
FBgn0037632	Tcp-1eta	55.9656	22.2608	71.9147	106.918	117.705	72.73	46.6393
FBgn0002781	mod(mdg4)	55.9387	45.5738	45.6922	47.9432	36.4302	31.3718	23.331
FBgn0015614	CanB2	55.9308	38.7349	39.1561	52.8358	67.5819	121.436	203.834
FBgn0267398	Yeti	55.8924	85.6306	41.4111	42.9497	48.9319	68.0965	102.461
FBgn0051028	CG31028	55.8549	23.6069	14.6924	11.9941	8.61588	10.3435	9.9005
FBgn0250789	alpha-Spec	55.8514	62.5254	59.083	85.4224	133.49	143.05	67.0181
FBgn0264270	Sxl	55.6801	46.9018	39.4438	30.5373	40.0994	45.1229	51.2696
FBgn0050423	CG30423	55.6374	74.4946	42.21	43.291	41.9564	48.5983	86.6111
FBgn0023212	EloB	55.5271	27.3172	24.8728	29.5521	36.1294	50.6151	37.6672
FBgn0042206	GstD10	55.4159	6.39269	26.8696	13.9155	8.41513	0.28489	1.26353
FBgn0033902	Tango7	55.296	34.8581	42.0448	34.9729	34.3011	50.3843	55.602
FBgn0034718	wdp	55.1702	1.37456	2.78541	26.8787	49.2149	456.864	709.499
FBgn0263396	sqd	55.0509	31.0468	36.6669	31.1782	42.2549	39.675	20.7107
FBgn0011211	blw	54.9594	243.466	156.216	127.997	184.337	192.582	80.4918
FBgn0037204	CG11131	54.8846	28.6176	16.5843	9.05374	2.95454	0.796154	0.289233
FBgn0035001	slik	54.7979	21.1028	17.9549	18.9671	18.5518	18.0551	24.7737
FBgn0262782	Mdh1	54.7608	72.2076	141.25	66.5509	60.0883	50.6777	37.2679
FBgn0025638	Roc1a	54.7239	60.8126	38.1956	51.9249	52.302	64.2674	58.5418
FBgn0037213	CG12581	54.6178	164.354	110.048	68.9912	31.603	71.8822	526.439
FBgn0050115	GEFmeso	54.5716	8.29949	6.40641	5.89525	7.87848	10.9036	45.1027
FBgn0036612	CG4998	54.5614	493.756	134.272	33.2611	7.39464	9.00232	5.16397
FBgn0010406	RNaseX25	54.5357	21.6634	21.8244	33.1446	37.1801	43.8208	41.6525
FBgn0030719	eIF5	54.5336	75.8225	50.5622	51.4471	55.3947	62.6525	46.2276
FBgn0039562	Gp93	54.4388	50.533	36.1282	16.1973	19.0821	10.7388	5.22763
FBgn0034067	CG8399	54.4277	59.4045	206.225	439.078	412.777	591.781	606.146
FBgn0259212	cno	54.3728	12.8065	36.4023	34.2967	23.7859	18.0307	26.6104
FBgn0010397	LamC	54.1544	120.131	61.9258	125.762	200.518	205.238	119.616
FBgn0033127	Tsp42Ef	54.0103	82.4161	40.2603	27.8006	32.1491	64.8643	45.5487
FBgn0026562	BM-40-SPARC	53.9849	48.1792	53.9254	35.3993	32.1263	32.3668	27.1599
FBgn0014011	Rac2	53.8581	29.318	24.4001	36.6128	50.3466	52.784	30.135
FBgn0038020	GstD9	53.8293	7.77388	32.7534	19.1659	13.5265	4.39771	3.03279
FBgn0266449	Kr-h2	53.8009	57.529	33.4397	33.6027	30.0322	30.3205	20.4645
FBgn0039213	atl	53.7942	28.6857	40.5146	50.2587	50.5792	76.9351	94.7975
FBgn0032198	eEF1delta	53.7622	56.061	46.2654	31.2677	25.2815	14.0832	5.28378
FBgn0039381	SppL	53.6631	171.444	39.0744	19.1775	11.3539	42.2615	127.868
FBgn0036538	CG15715	53.5484	31.321	30.4058	27.6859	27.9181	33.5699	24.4902
FBgn0024294	Spn43Aa	53.5115	8.05677	7.08462	2.32145	1.61872	1.29292	0.560201
FBgn0025835	CG17707	53.3767	1042.3	171.822	69.2347	7.77743	0.58394	5.30765
FBgn0028685	Rpt4	53.357	31.9699	25.1505	41.577	41.6752	57.8787	47.7888
FBgn0037852	Tpc1	53.3331	23.5485	2.74981	2.94736	12.0237	8.01773	4.95899
FBgn0034897	Sesn	53.3089	30.7922	34.8772	27.1516	27.5346	18.2054	24.9256
FBgn0031973	Spn28Dc	53.3028	25.9274	18.1041	13.536	71.2729	116.174	76.4951
FBgn0030077	CG15365	53.274	8.86863	23.6015	6.91822	3.55157	4.27452	4.07229
FBgn0028663	VhaM9.7-b	53.1964	114.878	101.449	115.139	352.407	742.296	769.726
FBgn0040309	Jafrac1	52.9159	28.0696	22.2887	11.7354	7.89857	3.95942	77.3903
FBgn0037099	CG7173	52.8278	0.323927	7.85949	1.29502	0.547756	0.033198	0.481885
FBgn0030263	CG2076	52.7939	50.3053	28.7179	22.5234	22.7093	24.5212	16.5608
FBgn0032685	CG10211	52.6917	207.705	32.3109	29.9297	36.3992	8.88335	4.6197
FBgn0000542	ec	52.6572	45.9711	43.6059	37.0362	20.2223	8.03615	6.32879
FBgn0027528	CG9634	52.6397	24.354	15.7743	13.8586	13.9624	13.604	19.1929
FBgn0032833	CoIV	52.5962	227.087	152.88	112.125	144.297	136.349	99.5055
FBgn0040551	CG11686	52.4678	53.0558	81.7553	125.532	623.901	2266.25	2437.16
FBgn0031816	CG16947	52.4303	30.3196	50.0906	59.6853	82.2718	115.192	95.3697
FBgn0267549	CR45889	52.4017	3.55662	1.34776	0.429919	0.143699	0.344778	12.9692
FBgn0026777	Rad23	52.3987	46.9453	28.7733	33.4063	37.7181	50.2385	60.7278
FBgn0086687	Desat1	52.3953	387.136	40.1264	27.9066	116.172	59.4989	42.7031
FBgn0039637	CG11880	52.3947	9.23799	8.75569	57.2775	385.529	938.81	961.347
FBgn0034030	CG8192	52.2997	2706.97	1812.35	76.4093	39.9824	20.3316	9.58935
FBgn0020621	Pkn	52.2963	28.0689	14.4481	15.4565	19.849	26.4266	19.3688
FBgn0019644	ATPsyn-b	52.2868	133.577	72.9733	82.5512	126.38	161.686	116.257
FBgn0011570	cpb	52.1941	46.8898	41.0152	49.0455	62.045	81.3355	58.265
FBgn0026376	Rgl	52.1643	84.588	29.4213	15.0146	16.7479	75.3766	2044.86
FBgn0000008	a	52.1409	43.512	17.4356	15.8696	6.96318	1.9839	7.65917
FBgn0010228	HmgZ	51.9927	51.8167	87.0272	85.9939	71.9584	35.6347	17.9951
FBgn0261278	grp	51.9281	8.94694	2.3913	1.27068	1.25437	0.954555	1.21982
FBgn0032147	IP3K1	51.8781	29.1972	92.0414	175.713	170.93	173.63	299.2
FBgn0031263	CG2789	51.8339	19.857	25.1483	77.9054	88.9389	63.3819	32.545
FBgn0028506	CG4455	51.8091	52.2793	38.9044	36.1274	28.4663	17.7003	19.6293
FBgn0010226	GstS1	51.6295	13.5475	15.4428	5.97306	5.57815	5.21567	10.0176
FBgn0027951	MTA1-like	51.584	16.0938	12.1223	10.4357	8.4512	6.49249	4.06937
FBgn0011260	Sema-2a	51.51	66.0399	48.3609	17.9716	4.64658	1.53098	2.40311
FBgn0034145	CG5065	51.3662	3.8323	0.961814	0.99185	1.40348	1.43074	3.25065
FBgn0052441	CG32441	51.3219	39.9289	29.0112	27.6828	27.7914	32.8747	29.177
FBgn0261277	rtv	51.288	74.4791	25.4901	20.7169	16.6948	21.7854	34.9671
FBgn0013997	Nrx-IV	51.2739	70.711	87.5526	91.3067	89.1963	53.3492	23.5259
FBgn0034534	maf-S	51.2409	53.9788	23.2393	27.552	27.3304	30.3382	23.8894
FBgn0023529	CG2918	51.1971	31.8576	21.8377	13.4987	6.21051	4.52554	2.33204
FBgn0267348	LanB2	51.1475	37.1464	68.4979	54.9201	32.078	21.3393	12.8653
FBgn0032213	CG5390	51.1097	33.0845	146.153	88.4522	72.8615	74.1062	62.221
FBgn0034143	CG8303	51.0625	26.9883	22.318	34.3104	5.27646	2.27319	6.19812
FBgn0262719	CG43163	50.95	36.7424	19.2372	10.7304	6.50264	2.62274	1.58287
FBgn0039969	Fis1	50.8224	42.9105	56.775	52.1241	63.3576	115.242	188.58
FBgn0024320	Npc1a	50.8163	77.2352	29.8051	24.109	24.5742	53.4685	127.596
FBgn0004509	Fur1	50.7959	12.7039	18.9853	21.8926	22.319	31.8042	30.1716
FBgn0024234	gbb	50.6552	49.6729	36.8076	33.2914	24.2883	22.2508	12.3366
FBgn0039113	CG10217	50.5816	59.6655	87.3733	109.496	99.6773	72.0919	51.9617
FBgn0003748	Treh	50.4853	65.8634	95.9138	80.0548	78.0454	59.9665	312.834
FBgn0036298	nst	50.3484	24.612	22.3253	20.5431	17.7474	8.46357	6.62877
FBgn0259221	CG42321	50.3303	17.3521	22.8368	31.3803	42.229	78.0504	59.966
FBgn0016930	Dyrk2	50.2205	68.896	11.3809	13.2417	5.19014	8.49156	2110.15
FBgn0265177	CG44242	50.1838	27.1	16.5587	22.3971	24.6798	19.0362	6.18659
FBgn0010441	pll	50.1186	31.6379	6.17569	5.3534	5.09821	7.11281	6.82566
FBgn0000259	CkIIbeta	49.9733	50.4655	47.1655	33.8765	43.3483	35.5629	20.3961
FBgn0243486	rdo	49.933	17.0261	5.72593	1.58951	2.1823	2.21231	1.92098
FBgn0000579	Eno	49.9253	12.102	40.6682	24.1845	42.5411	53.636	99.6957
FBgn0031776	CG13993	49.9075	14.587	37.1873	59.7585	70.2747	59.0501	26.7518
FBgn0263977	Tim17b	49.7895	89.3198	73.507	53.641	53.9534	61.037	59.3712
FBgn0036801	MYPT-75D	49.7181	9.20778	1.93405	1.69151	8.48892	53.7869	87.1665
FBgn0265187	CG44252	49.6293	1.54014	1.27695	9.65451	122.454	71.4329	16.6623
FBgn0000163	baz	49.6117	49.5197	48.2209	33.5321	35.6284	41.0617	114.475
FBgn0264922	smt3	49.5739	40.9352	36.1302	44.035	40.7925	28.793	10.9855
FBgn0086134	Prosalpha2	49.4913	38.3905	26.3387	49.6318	48.7951	55.6202	48.6739
FBgn0020249	stck	49.4812	31.5046	39.5475	75.7119	114.498	96.3734	142.527
FBgn0261802	CG42748	49.4759	35.4769	32.7196	24.05	15.2009	7.98879	14.3009
FBgn0028577	pUf68	49.4211	22.5134	33.5868	32.873	31.153	26.8216	31.844
FBgn0033785	Sans	49.3852	47.5288	8.63458	2.31322	0.242865	0.293593	23.4795
FBgn0261283	HLH106	49.3142	40.5674	34.8893	18.1331	18.5421	35.6019	38.3487
FBgn0020369	Rpt6	49.2481	35.618	24.9014	45.0685	47.5273	72.9379	74.4047
FBgn0265011	Np	49.2274	2.53649	1.12756	0.862543	0.0742194	0.115319	0.0768703
FBgn0038842	hdly	49.2128	47.7359	81.6808	135.418	155.79	128.365	68.2615
FBgn0052666	Drak	49.1631	14.9957	39.5673	37.1992	31.2312	57.6788	171.843
FBgn0250788	beta-Spec	49.1572	74.9094	123.165	181.25	246.558	261.249	131.036
FBgn0029095	aru	49.1482	60.3348	89.1645	49.4637	55.3654	47.9469	49.0063
FBgn0028582	lqf	49.1099	33.6085	20.1901	20.6883	26.1333	27.6123	44.081
FBgn0040271	Sulf1	49.03	117.705	18.4782	5.51133	6.47962	5.5829	62.5459
FBgn0015754	Lis-1	49.0132	65.0841	32.1984	24.2144	21.7045	63.9509	270.65
FBgn0052068	CG32068	48.9635	19.1851	13.6347	14.1054	13.6278	9.85415	8.44094
FBgn0011603	ine	48.9274	17.0494	6.17159	3.14112	5.28518	7.48851	6.23195
FBgn0050011	gem	48.8421	58.2773	32.6748	24.0767	21.6909	23.9402	55.7097
FBgn0036334	CG11267	48.8309	63.3136	24.8967	23.5324	23.4626	11.2808	4.45196
FBgn0041094	scyl	48.7618	26.7199	41.499	34.6736	62.1336	79.3534	233.857
FBgn0022097	Vha36-1	48.7567	88.9517	75.2326	92.4671	198.312	465.823	564.252
FBgn0036688	Fit2	48.7191	13.2933	39.8739	92.6647	142.32	104.674	35.7506
FBgn0035142	hipk	48.6567	22.1671	25.7899	25.3907	26.7262	34.0368	60.0847
FBgn0000454	Dip-B	48.6565	58.0608	10.8992	16.1013	15.2153	8.01888	24.297
FBgn0020545	kraken	48.6299	34.2462	45.8893	17.9215	12.7978	23.8429	75.3224
FBgn0015283	Rpn10	48.6274	31.3702	28.8309	50.5218	51.8148	82.5525	82.3694
FBgn0033624	CG12384	48.5899	36.0501	56.1878	91.6748	111.838	98.3945	50.0415
FBgn0024432	Dlc90F	48.5652	68.3605	54.0418	71.2443	98.6447	75.0431	63.1616
FBgn0051694	CG31694	48.5399	63.4183	36.7082	19.9621	16.5958	29.0565	53.2635
FBgn0011653	mas	48.5298	0.409613	6.46281	0.623991	0.0487238	0.0443158	0.637883
FBgn0034639	CG15673	48.5136	10.9368	7.09593	0.913131	1.55264	0.723896	69.4498
FBgn0260855	Sec22	48.4898	141.273	32.2554	20.1479	20.5648	26.1034	25.7326
FBgn0029687	Vap-33A	48.4384	25.7102	27.3967	32.0856	37.2461	37.7626	49.2517
FBgn0013720	pck	48.4383	64.8401	124.303	152.283	117.087	70.1633	32.9835
FBgn0264507	CR43906	48.4347	111.803	78.9775	33.147	18.9176	8.57448	3.95725
FBgn0004574	Rop	48.4323	43.2847	33.2979	49.5612	65.8265	121.802	102.398
FBgn0035936	Tsp66E	48.2911	699.247	308.264	72.5172	12.227	4.98089	7.78385
FBgn0028331	l(1)G0289	48.2876	49.4357	40.4184	31.6635	22.8521	23.3097	116.696
FBgn0033381	GstE13	48.2093	21.5762	60.0023	117.026	78.464	37.7766	16.64
FBgn0025582	Int6	47.8711	34.8287	46.3145	53.0014	47.9062	62.0923	87.1242
FBgn0029709	CHOp24	47.8209	55.7169	39.2857	37.8588	31.1285	24.6963	17.9536
FBgn0030520	Pdcd4	47.6996	43.9844	80.2908	118.421	159.025	94.7489	37.7629
FBgn0266711	EloC	47.658	38.4499	24.1317	30.0874	40.7988	29.5619	50.7607
FBgn0027087	Aats-his	47.3892	53.8572	39.482	25.2945	16.3521	26.5539	56.0616
FBgn0002778	mnd	47.2838	73.9631	15.5801	5.49511	1.82638	1.05863	32.8503
FBgn0264905	CR44096	47.2585	61.0415	63.3569	18.6705	5.06786	0	0
FBgn0035526	CG1316	47.2381	25.8884	12.2669	6.9974	10.5267	9.71085	7.33559
FBgn0043012	AP-2sigma	47.1073	51.2807	41.0665	50.3512	46.0014	48.6481	43.4055
FBgn0034928	CG13562	46.9674	9.13565	2.87499	6.24498	2.43933	1.45005	0.579653
FBgn0034066	CG8397	46.8666	33.2108	32.8046	32.4878	34.7807	36.3195	32.6904
FBgn0038976	CG7048	46.835	23.9587	44.5287	66.1817	65.0838	44.126	17.3501
FBgn0046214	vig2	46.7823	49.5591	51.9613	36.0611	24.9101	17.1536	10.7916
FBgn0259734	CG42388	46.7387	15.8058	10.548	9.92552	11.8165	9.53717	9.13483
FBgn0040793	CG7630	46.69	126.169	50.4507	51.0807	71.1228	83.5586	76.0997
FBgn0021765	scu	46.6225	52.7661	37.8324	24.9133	22.1345	11.961	7.25904
FBgn0013749	Arf102F	46.5953	87.7093	39.0836	33.9939	38.3386	65.9599	60.7147
FBgn0023001	melt	46.5455	140.588	70.1594	25.4482	13.586	17.5258	27.5187
FBgn0040623	Spase12	46.458	45.0361	18.4708	15.8713	19.0292	8.794	6.04221
FBgn0039537	CG5590	46.4317	23.3656	24.6746	19.4107	27.0547	37.9673	28.2434
FBgn0266084	Fhos	46.3086	12.7834	22.5435	3.23989	2.26815	1.57041	1.01587
FBgn0038829	CG17271	46.2172	59.7458	31.1034	25.4635	16.2162	12.2349	6.15463
FBgn0028671	Vha100-1	46.2109	21.4639	13.105	12.7615	15.8659	21.9537	61.3433
FBgn0035528	CG15012	46.202	54.4034	41.5688	37.3215	37.6659	44.1869	66.1236
FBgn0034606	ASPP	46.1953	24.3986	34.3029	16.3488	7.47967	9.76857	17.6374
FBgn0001255	ImpE3	46.1331	18.1332	1.44212	0.408917	0.238198	0.518089	27.1185
FBgn0262515	VhaAC45	46.0982	67.6114	70.281	101.579	257.86	504.436	430.246
FBgn0034877	levy	46.0137	155.008	104.607	94.9201	121.69	138.845	102.399
FBgn0027790	GV1	45.9413	217.157	273.044	555.249	720.228	951.97	495.584
FBgn0026144	CBP	45.8398	52.1253	16.7121	18.457	38.5321	12.8876	21.6611
FBgn0086906	sls	45.8227	21.0524	24.3	18.9707	42.1518	80.2933	41.5571
FBgn0030598	CG9503	45.7999	31.1044	1.50203	0.0204246	0.0235311	0.0641721	0.116434
FBgn0011725	twin	45.7798	17.9735	10.4966	12.1709	10.0835	4.74064	3.84965
FBgn0036518	RhoGAP71E	45.7709	24.9971	32.7247	16.3076	8.7248	4.43993	2.11394
FBgn0013680	mt:ND2	45.7018	52.9907	42.6916	71.6655	68.3791	52.1713	71.9047
FBgn0035430	CG12009	45.6373	0.0580609	2.2864	0.0301437	0.0509473	0	0
FBgn0027572	CG5009	45.5439	49.5958	77.7162	39.8356	51.1351	94.492	114.533
FBgn0013987	MAPk-Ak2	45.3808	67.7632	51.1935	43.3638	40.4916	60.6438	69.9945
FBgn0038967	CG13847	45.3716	20.3585	8.58642	8.04028	16.1806	22.7092	25.1916
FBgn0264693	ens	45.2306	35.2458	28.6519	31.1263	45.0267	84.8526	139.009
FBgn0264986	CR44137	45.1812	15.8862	24.6759	15.1924	15.5079	12.0075	10.3084
FBgn0261015	Pif1A	44.9982	87.9106	37.4613	11.1257	7.21594	6.6554	10.8127
FBgn0024196	robl	44.9839	41.4628	29.5297	35.7005	33.0746	43.4859	47.0546
FBgn0038180	Cht5	44.933	1.57832	3.32412	0.75121	0.0948234	0.339124	6.19203
FBgn0034644	CG10082	44.9188	22.6557	24.4406	13.6162	11.8612	13.33	40.4304
FBgn0003870	ttk	44.8601	43.2199	66.8944	37.1176	17.2305	15.2301	35.0187
FBgn0010762	simj	44.8419	10.6714	20.0941	15.9344	11.5319	9.43888	8.59261
FBgn0028427	Ilk	44.8244	19.8231	67.4694	126.303	189.122	164.296	82.5371
FBgn0033844	bbc	44.7622	26.8199	14.4853	15.3685	11.3859	21.0404	24.9487
FBgn0037421	CG15594	44.6093	0.0649775	0	0	0	0	0
FBgn0260653	serp	44.4834	1235.65	348.469	122.435	65.8649	36.0541	88.3892
FBgn0261545	CG42663	44.4285	39.9972	21.3745	8.10744	3.12761	6.01877	173.981
FBgn0035829	HP4	44.4113	17.8882	6.44354	8.74512	5.48404	4.65767	0.456955
FBgn0020389	Papss	44.3786	585.211	34.3987	7.71921	4.76618	2.69439	1.40679
FBgn0262720	CG43164	44.2588	0.115769	0.325469	0	0.181981	0.159403	0.0682058
FBgn0030519	CG11151	44.2219	40.0601	109.287	85.6745	90.7614	107.388	82.7986
FBgn0263038	CG43333	44.2198	29.0258	33.8546	48.3224	4.92229	0.129272	0.680685
FBgn0030749	AnxB11	44.2183	31.2331	35.6266	36.8634	41.5904	44.9845	24.3475
FBgn0085408	Shroom	44.1925	34.8923	50.4476	38.0117	66.3714	57.4477	42.9189
FBgn0003676	T-cp1	44.0728	17.8767	67.7365	110.784	129.61	80.5188	28.6391
FBgn0004132	boca	44.066	19.5546	10.2368	9.60851	8.18111	6.43936	6.15065
FBgn0028479	Mtpalpha	44.0546	30.6951	28.9098	29.295	31.6899	35.9607	22.4307
FBgn0026088	CG14818	44.0388	37.819	57.5737	46.1287	80.1144	124.448	122.151
FBgn0033448	hebe	43.8753	3.28224	1.21631	0.686676	10.7975	158.115	97.1502
FBgn0010621	Cct5	43.7769	26.0528	72.5643	124.504	175.491	105.517	25.3409
FBgn0030321	CG1703	43.7496	20.0078	10.4195	10.5662	10.6076	9.56064	3.79971
FBgn0031260	Spp	43.7117	36.8122	22.0713	13.0285	10.2	6.8234	3.28379
FBgn0015808	ScpX	43.7089	84.1633	140.019	60.9017	45.2384	66.2829	78.7794
FBgn0031670	CG3887	43.6774	30.5219	50.6132	29.0877	24.465	22.8836	15.1833
FBgn0032596	Prosbeta4	43.606	25.0585	23.9969	59.2176	60.0448	78.7542	70.4675
FBgn0015229	glec	43.5124	18.1887	84.5723	59.5823	63.6978	27.5841	26.6151
FBgn0035767	CG8596	43.4545	29.7212	12.8271	4.48477	2.77326	2.45612	16.5053
FBgn0001085	fz	43.3919	29.7879	8.18431	3.22724	1.04573	0.530193	1.05237
FBgn0037912	sea	43.2844	3.50695	19.0201	31.2353	39.9952	23.8852	13.177
FBgn0010786	l(3)02640	43.2185	56.6979	37.0316	33.1954	16.4881	13.6399	33.4708
FBgn0030521	CtsB1	43.1951	61.2309	54.9243	58.0073	43.0634	37.3625	28.42
FBgn0034654	CG10306	43.1358	32.352	34.5761	23.7878	19.9307	22.9354	22.9864
FBgn0004360	Wnt2	43.0804	9.49359	15.6741	43.7259	20.7403	5.84394	4.97021
FBgn0040512	zetaCOP	43.0741	35.4959	32.6638	23.8402	26.4589	20.9769	17.3563
FBgn0038826	Syp	43.0573	134.457	103.683	58.6018	54.5438	31.7458	28.9174
FBgn0263197	Patronin	43.0328	27.3574	26.1331	36.569	40.3086	35.8824	21.3247
FBgn0034856	yellow-d2	43.021	83.7348	1224.44	249.624	87.0001	7.41131	1.37238
FBgn0035964	Dhpr	42.9243	427.781	110.716	203.038	189.511	237.979	109.574
FBgn0037570	CG11693	42.7982	24.5948	0.084741	0.0679002	0.580596	2.09928	8.71371
FBgn0262125	Sec23	42.7167	42.4178	26.3487	22.2615	20.7944	23.3401	14.1561
FBgn0030329	prtp	42.6625	21.504	18.2554	19.9768	14.7069	8.92041	8.78223
FBgn0020300	gk	42.5598	172.219	30.2218	60.4674	13.1374	114.85	126.012
FBgn0035995	CG3529	42.547	27.5937	10.5077	8.18117	7.7463	7.50735	10.1451
FBgn0260632	dl	42.531	50.8463	38.8822	13.7151	13.6006	7.3479	12.7821
FBgn0039909	CG1970	42.5219	95.1324	49.3253	39.1264	47.2608	60.0063	47.1701
FBgn0028686	Rpt3	42.4765	33.2283	26.4064	52.2173	56.3685	78.3639	53.5184
FBgn0034491	Hsl	42.394	20.1246	14.4441	25.0563	26.1438	50.7854	62.6087
FBgn0264303	CG43781	42.337	78.8351	183.255	243.623	197.616	73.3211	19.5536
FBgn0264574	Glut1	42.2941	4.51216	7.6758	1.23882	1.60458	14.1339	48.431
FBgn0041096	rols	42.2837	18.355	21.0819	10.9398	5.159	2.87062	1.89538
FBgn0265298	SC35	42.2236	35.6807	8.17897	6.52192	5.16644	5.45109	2.77523
FBgn0266410	CG45050	42.2151	57.7745	51.814	48.159	52.8159	135.424	875.806
FBgn0034181	CG8963	42.1593	28.3809	16.3775	20.6526	19.2794	24.5702	30.0834
FBgn0010575	sbb	42.0503	30.2888	24.4924	11.2435	6.33117	3.87863	6.44283
FBgn0031515	CG9664	41.9962	0.963991	0.521794	0.204446	0.361626	0.493455	2.67144
FBgn0035519	CG1309	41.9399	24.9445	34.1156	27.9227	20.7219	14.6992	11.8865
FBgn0015600	toc	41.8462	81.2409	51.4087	86.5951	132.841	171.652	190.212
FBgn0034956	CG4324	41.8338	10.0767	2.41303	0.826846	0.162332	0.252233	1.27093
FBgn0035557	CG11353	41.8156	16.6329	3.11882	0.911606	1.4567	1.8912	0.656182
FBgn0031821	KFase	41.7361	46.0715	77.4499	35.0386	23.0339	26.7586	60.2935
FBgn0037135	CG7414	41.7126	62.9898	63.3954	106.552	112.6	148.808	249.92
FBgn0261862	whd	41.675	53.1615	131.609	22.1875	16.3909	33.1129	18.4843
FBgn0026160	tna	41.6518	43.8223	94.9075	63.2976	39.6559	27.0622	16.4123
FBgn0041188	Atx2	41.624	28.9729	10.4745	13.5864	10.0908	7.21872	6.72937
FBgn0027329	Tcp-1zeta	41.4853	14.2789	47.0822	94.6786	123.573	67.6399	21.1028
FBgn0035427	ckd	41.454	11.2579	117.729	73.0365	29.2028	5.42004	14.1429
FBgn0039026	CG7029	41.4012	65.8097	33.5205	35.8528	49.8203	65.8528	92.4263
FBgn0024509	Sec13	41.3894	40.8843	23.529	28.6703	26.9993	22.436	14.0662
FBgn0001142	Gs1	41.3494	280.442	81.1833	45.3649	5.48163	2.18883	8.29421
FBgn0016078	wun	41.3376	5.49603	32.5396	8.07267	11.652	78.8992	349.809
FBgn0036289	CG10657	41.3044	568.616	30.8602	639.907	170.028	42.816	12.7601
FBgn0039902	Zip102B	41.2964	48.5051	31.4652	22.5284	17.3577	20.9676	54.2111
FBgn0033928	Arc2	41.2784	12.6435	11.4963	4.20788	4.21284	1.34651	3.01757
FBgn0036516	CG7656	41.2312	7.95339	6.38349	19.6065	85.8454	228.119	221.312
FBgn0264607	CaMKII	41.2239	39.1474	28.9625	22.8787	22.5364	26.9489	27.4323
FBgn0037838	CG4089	41.1936	24.0437	10.6432	13.7514	6.35105	3.42957	0.998078
FBgn0038577	CG12321	41.1657	22.2769	21.1524	23.2902	20.4751	23.9452	19.5215
FBgn0003391	shg	41.1597	23.4825	27.1194	21.1876	13.0663	8.93241	14.0919
FBgn0001230	Hsp68	41.1195	8.59398	50.2632	10.0184	7.54741	3.45488	3.23106
FBgn0033434	CG1902	40.9466	52.5691	35.7152	30.5212	68.231	85.1875	58.6821
FBgn0023477	Tal	40.9342	23.9426	44.071	53.0289	44.2452	87.0619	98.3294
FBgn0013347	TfIIA-S	40.9327	38.9314	30.0387	40.9447	42.7969	50.6875	31.1201
FBgn0000394	cv	40.8278	74.4463	62.7814	41.1141	34.3583	39.8108	77.386
FBgn0039136	CG5902	40.768	59.2227	32.3438	32.3075	32.9163	52.5318	111.416
FBgn0035432	ZnT63C	40.6626	18.3099	34.5901	15.2458	18.9198	15.725	35.7444
FBgn0035603	CG10635	40.6548	20.4924	37.376	61.9884	65.5676	49.4758	23.2393
FBgn0001215	Hrb98DE	40.6081	47.5072	33.642	37.6639	29.1164	39.3763	26.3799
FBgn0004436	Ubc6	40.6025	26.3462	21.4694	32.1041	52.7429	73.4849	70.4572
FBgn0028473	Non1	40.5964	28.7722	76.0769	52.7206	45.4731	64.22	100.405
FBgn0037114	Cpr78E	40.5411	0.840869	1.40595	0.544618	0.128229	0.174881	0
FBgn0030503	Tango2	40.5163	3.43999	2.01262	2.57685	2.47031	2.33414	2.46329
FBgn0033342	CG8258	40.4953	26.9585	47.1584	68.4657	88.943	52.6337	14.438
FBgn0029924	CG4586	40.3558	8.37319	83.3117	27.0432	12.9429	4.20439	1.39109
FBgn0250746	Prosbeta7	40.3299	19.3269	23.8142	50.7328	49.3811	60.7477	54.8456
FBgn0040773	CoVIIc	40.3102	145.058	77.9327	71.1191	93.8624	101.07	70.4937
FBgn0035480	CG14984	40.152	14.2618	32.2611	7.68496	27.1123	110.093	192.948
FBgn0032943	Tsp39D	40.1081	19.0475	15.3332	10.1979	7.49809	6.24523	7.16766
FBgn0036211	CG5946	40.0342	16.8247	6.25902	27.8092	56.3346	40.8849	23.0022
FBgn0014029	2015-09-02	40.0124	38.336	46.8785	73.3976	57.3382	33.0836	19.1018
FBgn0037541	CG2747	39.9095	29.3941	14.9791	21.5137	17.4818	14.9626	24.8379
FBgn0035234	CG12003	39.8474	9486.36	1.54276	0.660104	0.273853	0.527627	404.79
FBgn0004654	Pgd	39.7991	18.2391	11.0334	89.3643	82.2681	129.087	140.516
FBgn0038224	CG3321	39.7683	126.368	72.3009	55.5906	83.4527	112.569	61.7081
FBgn0020767	Spred	39.6872	21.4269	16.4377	16.992	15.7747	10.795	7.78454
FBgn0039111	Plip	39.6529	25.7857	8.14483	10.0494	7.90886	4.27807	1.72716
FBgn0034258	eIF3-S8	39.6118	31.6736	41.2925	36.8627	31.5881	39.0318	41.908
FBgn0262512	Vha14-1	39.5747	77.9778	78.283	78.2541	175.735	351.171	400.187
FBgn0250823	gish	39.5463	32.3272	33.9076	28.3587	23.7369	29.9416	136.94
FBgn0041789	Pax	39.5411	46.3571	40.9767	21.1289	46.0589	81.9536	39.6334
FBgn0035906	GstO2	39.4994	52.1401	39.3753	25.792	30.11	42.8609	25.3948
FBgn0264975	Nrg	39.3537	124.56	107.497	118.383	150.146	127.961	58.3258
FBgn0039379	CG5886	39.334	9.2259	16.5503	32.1879	66.3992	80.4806	41.157
FBgn0032421	crok	39.3004	46.595	60.4012	75.7458	60.6381	26.9218	10.2417
FBgn0010612	l(2)06225	39.283	163.834	90.8459	73.0762	84.0176	100.587	90.8613
FBgn0010590	Prosbeta1	39.1637	29.614	28.6122	55.7421	46.7613	43.168	30.6048
FBgn0025678	CaBP1	39.1468	23.8453	17.0672	9.95938	8.755	4.59273	1.4786
FBgn0003159	ptr	39.0807	63.3776	30.3614	17.3684	4.34172	34.1755	87.2341
FBgn0261800	LanB1	39.061	28.0175	62.7361	26.8902	21.321	13.7814	7.30861
FBgn0010741	l(3)01239	38.9919	23.6763	50.7172	78.5112	111.139	94.8743	48.8826
FBgn0030208	PPP4R2r	38.9756	9.62246	8.66179	10.6208	8.19124	3.31564	0.460616
FBgn0023214	edl	38.9174	5.50869	24.1187	21.7043	23.2259	19.4312	21.3892
FBgn0051715	CG31715	38.8715	42.9203	30.5416	30.7012	26.7761	39.2199	41.9844
FBgn0025641	DAAM	38.8698	20.0046	22.1876	12.6362	6.2496	6.03604	26.2679
FBgn0052529	Hers	38.8181	15.8427	19.2566	14.751	15.0054	10.7771	6.58567
FBgn0008635	betaCOP	38.7678	45.6498	25.3813	17.4233	20.561	21.6341	16.2504
FBgn0039234	nct	38.7577	20.8845	11.8961	17.9662	18.0719	24.3125	40.1497
FBgn0003890	betaTub97EF	38.7545	7.46203	4.35384	8.16548	35.6698	131.887	180.504
FBgn0036373	Tgi	38.7395	6.58945	22.3683	11.9568	9.0592	10.6117	10.1037
FBgn0031459	CG2862	38.6821	11.7744	15.008	19.6641	22.9174	16.2869	8.00978
FBgn0266465	GckIII	38.6429	21.7924	11.4075	14.619	16.4439	16.9756	10.1361
FBgn0011224	heph	38.6401	6.55746	3.35975	4.83102	6.05981	4.1874	7.78371
FBgn0000723	FER	38.5378	62.8742	14.6161	5.50785	5.16921	3.38209	4.14511
FBgn0032160	CG4598	38.5077	21.6524	22.0173	19.6087	21.6818	19.2959	10.5798
FBgn0262732	mbf1	38.4626	44.8696	38.8035	35.7744	37.2804	28.1754	10.7398
FBgn0036556	CG5830	38.3902	20.0497	28.8873	15.8584	19.4096	26.7469	21.3933
FBgn0028665	VhaAC39-1	38.3847	49.506	44.3827	66.7077	186.044	313.821	262.43
FBgn0058191	CG40191	38.3626	35.6965	22.176	24.0538	29.4078	32.4318	30.8015
FBgn0051030	CG31030	38.3608	9.23868	7.32415	4.10452	3.29464	3.27806	4.13807
FBgn0031530	pgant2	38.3597	154.358	17.5885	64.4535	358.148	298.068	80.6896
FBgn0033355	CG13748	38.3302	1036.32	1722.02	167.226	333.07	97.6646	27.0306
FBgn0035497	CG14995	38.3272	28.7164	10.4539	14.1383	28.3015	53.8822	67.6805
FBgn0261674	CG42709	38.2826	15.468	36.1411	186.973	165.487	136.227	91.2631
FBgn0033926	Arc1	38.2809	14.5014	8.0463	1.91292	3.02036	2.55678	2.22252
FBgn0014391	sun	38.1692	172.718	75.6855	44.8113	77.5595	100.902	60.2419
FBgn0025615	Torsin	38.1528	8.87811	18.2995	16.8459	16.4155	9.99001	5.37793
FBgn0036165	chrb	38.0997	21.1015	29.1256	50.7429	125.543	64.0159	39.6864
FBgn0024291	Sir2	38.0959	22.8718	19.9398	13.7455	15.8592	16.253	11.3153
FBgn0021979	l(2)k09913	38.0766	44.2798	58.9159	50.6933	40.6143	29.1602	19.999
FBgn0010747	Srp54k	38.0723	43.7339	21.8961	19.4979	18.9996	22.7163	20.3468
FBgn0039698	CG7789	38.027	11.3898	4.4393	10.6121	16.5514	43.9222	38.6519
FBgn0031488	CG17265	38.0251	8.69233	10.8199	3.71698	1.1208	1.01507	6.6067
FBgn0259993	CR42491	38.0197	46.4	15.3811	9.19056	6.44063	3.50321	6.8732
FBgn0040388	boi	38.008	9.30164	17.5401	17.2595	2.04837	1.94589	1.20141
FBgn0032640	Sgt	37.9795	25.9377	22.8232	29.3851	30.0711	33.387	25.6871
FBgn0016691	Oscp	37.9454	117.357	63.7512	73.3492	99.6008	107.059	69.8849
FBgn0259163	CG42268	37.9097	13.7244	12.1288	12.9477	7.50755	9.37704	34.3756
FBgn0027779	VhaSFD	37.891	62.0394	58.4282	77.8048	212.511	382.92	379.742
FBgn0086898	dgo	37.8748	18.9683	10.4278	4.67518	6.51323	6.30808	2.66929
FBgn0050015	CG30015	37.6979	55.3154	41.4598	18.2768	15.308	13.9848	32.2881
FBgn0035501	CG1299	37.6578	4.66833	1.52707	0.675717	2.22466	140.18	238.858
FBgn0033158	CG12164	37.5252	17903.7	96.521	61.543	5.62384	1.15297	1.45947
FBgn0020647	KrT95D	37.5137	8.80453	6.16341	2.92472	0.934126	1.37255	5.8114
FBgn0030099	CG12056	37.4127	20.0027	19.0659	18.8393	10.7416	8.42765	5.43367
FBgn0021742	C901	37.374	1.31824	1.17429	0.336763	0.135439	0.378758	0.0713314
FBgn0014857	His3.3A	37.2385	41.9718	29.8474	41.4217	43.2216	36.6694	15.3965
FBgn0015040	Cyp9c1	37.212	32.0814	22.7298	16.9111	12.0422	5.69183	5.53979
FBgn0034861	CG9815	37.2053	135.676	21.2137	79.3802	323.366	247.493	79.4499
FBgn0027492	wdb	37.1718	18.1778	15.9573	17.9061	20.8057	27.6524	61.0125
FBgn0030328	Amun	37.1127	25.1887	25.5781	30.3125	29.0849	25.7854	57.8727
FBgn0265082	Cdep	37.0525	39.6625	82.8443	51.4716	26.814	25.3703	33.5439
FBgn0032783	CG10237	36.9677	2.96016	14.6464	30.2162	225.836	1619.4	1115.7
FBgn0035880	CG17352	36.8491	10.7522	12.1942	3.03705	2.40944	0.329093	0.621986
FBgn0052528	parvin	36.8012	16.4398	66.8945	127.681	161.321	173.893	124.215
FBgn0031992	CG8498	36.775	23.1637	28.5596	29.2213	33.6777	25.2162	15.6379
FBgn0262473	Tl	36.7353	26.9282	27.8406	12.5013	7.353	10.8874	24.5223
FBgn0038115	CG7966	36.697	5.24161	6.57665	3.73823	1.76474	0.606496	0.27686
FBgn0035206	CG9186	36.6403	54.4405	15.8049	14.6641	11.8246	10.3679	89.7678
FBgn0261244	inaE	36.5838	6.23069	2.75788	1.55178	0.688282	0.700723	2.86842
FBgn0034368	CG5482	36.5426	38.6081	29.0907	25.5817	25.3378	27.994	38.4253
FBgn0032535	Ance-2	36.5019	12.2737	104.824	75.1588	78.6582	72.3488	41.4877
FBgn0264492	CkIIalpha	36.4817	31.9402	25.0753	23.6006	31.3738	33.9423	25.9354
FBgn0015282	Rpt2	36.4679	30.929	23.5164	49.7397	81.4393	157.772	120.562
FBgn0015019	Cctgamma	36.4224	24.642	62.2391	91.2566	103.685	68.1544	39.1386
FBgn0040284	SF2	36.3541	15.791	17.1875	12.3439	19.1847	24.3993	11.7022
FBgn0037374	jagn	36.3521	32.967	18.8447	18.2866	21.1908	20.0638	18.1798
FBgn0016701	Rab4	36.2464	50.7437	44.297	38.202	31.8997	29.3265	46.7012
FBgn0001197	His2Av	36.2156	13.0708	11.312	8.00832	6.9586	7.56727	3.73519
FBgn0051992	gw	36.1773	35.9003	32.0757	28.4992	32.3186	36.2443	45.7166
FBgn0037533	CD98hc	36.1555	134.696	74.3897	42.4385	35.9279	47.1173	51.5493
FBgn0010774	Ref1	36.0732	32.9509	23.6561	30.0122	29.6877	28.1208	13.0555
FBgn0036824	CG3902	36.0699	22.8611	41.9846	30.4318	20.514	10.6976	4.7955
FBgn0262026	CG42837	36.0658	68.8029	43.7229	97.8594	120.555	60.5078	111.844
FBgn0015286	Rala	36.0645	51.5335	12.7281	9.93115	9.2425	18.342	57.9052
FBgn0011274	Dif	36.0612	86.2972	30.9273	8.06762	7.92966	12.0832	16.9275
FBgn0010602	lwr	35.9872	53.745	36.2539	37.2494	36.4166	47.2449	47.9643
FBgn0032495	CG16820	35.9751	404.285	439.684	196.647	162.184	87.4836	20.2249
FBgn0035947	Srp68	35.9275	18.3251	13.7005	15.1836	15.37	13.5595	6.94709
FBgn0024238	Fim	35.9091	28.7355	12.2107	19.8899	26.9044	47.8641	39.3657
FBgn0034970	yki	35.9089	39.6626	27.6795	26.7401	23.817	29.2117	31.5572
FBgn0052280	CG32280	35.9044	44.8157	45.7569	79.1766	143.741	161.022	114.142
FBgn0030841	CG8568	35.8621	5.05368	1.91833	0.808063	0.414998	0.390779	0.273857
FBgn0033760	CG8785	35.8541	20.6662	47.6174	157.896	326.891	204.895	126.346
FBgn0015772	Nak	35.8503	12.8446	7.60446	12.7037	15.617	29.7386	93.5392
FBgn0000183	BicD	35.8358	18.2092	19.1984	14.5567	15.914	13.5813	11.4231
FBgn0260008	Ucrh	35.8348	110.548	71.3625	54.0716	66.6731	97.0637	108.273
FBgn0036918	CG7770	35.7769	27.6325	38.6606	44.7177	61.7284	53.0924	39.9971
FBgn0052040	CG32040	35.7717	41.1242	19.3487	5.677	1.04957	0.230774	0.330218
FBgn0039686	CG15506	35.7565	1.20263	7.22655	4.88169	3.02286	1.38195	1.49153
FBgn0037728	CG16817	35.7329	41.2487	38.0317	46.3593	47.7971	36.6305	20.8099
FBgn0016126	CaMKI	35.7172	44.2879	38.1945	30.3016	31.9549	34.8335	47.2008
FBgn0035199	CG9134	35.6818	2701.38	375.093	133.651	69.1977	44.6462	25.951
FBgn0038511	CG5873	35.6786	1160.74	620.217	1109.27	202.067	8.96213	98.2053
FBgn0033062	Ars2	35.6598	19.816	15.4837	12.5627	13.4013	8.81926	8.45726
FBgn0032240	CG17768	35.5867	27.1126	24.6564	24.8149	17.4314	17.0737	11.6605
FBgn0026620	tacc	35.5665	21.8272	42.8643	51.6043	50.6036	67.5129	227.58
FBgn0039135	CG13603	35.5225	42.4994	29.1259	26.9179	19.4232	20.3456	32.0235
FBgn0033669	PI31	35.522	11.2092	23.6132	32.0994	26.5483	25.2963	32.4669
FBgn0015776	nrv1	35.4907	16.1708	42.8012	48.2609	64.3303	181.267	700.874
FBgn0264494	CG17646	35.4751	9.70781	7.06994	53.241	55.4148	8.69104	2.44524
FBgn0031914	CG5973	35.4159	47.8603	95.9342	45.2701	52.5771	110.035	89.2189
FBgn0036299	Tsf2	35.4121	53.595	85.6996	97.742	80.4609	41.0151	21.6633
FBgn0016059	Sema-1b	35.4057	42.5636	45.1684	49.0512	36.8565	32.5293	197.536
FBgn0033378	tsu	35.3739	13.8992	10.6622	9.58144	9.30427	6.17016	2.92057
FBgn0032479	CG16974	35.3364	38.6062	42.522	38.8277	36.2739	30.8945	29.3576
FBgn0036353	CG10171	35.2932	11.3468	8.50847	10.6621	8.34814	5.14963	2.29737
FBgn0005648	Pabp2	35.2913	10.7375	7.60783	4.22486	6.24624	7.55737	4.57755
FBgn0261461	RhoGAP18B	35.2548	14.5236	15.6087	11.3124	9.03034	14.0243	18.0467
FBgn0028693	Rpn12	35.2432	29.0183	20.12	38.2968	35.3209	68.8485	73.6867
FBgn0027338	Kap-alpha3	35.2424	50.0041	32.5393	35.9404	44.7008	66.7559	75.1499
FBgn0022382	Pka-R2	35.1995	20.2317	73.2091	174.384	334.158	308.184	145.223
FBgn0038808	Srp14	35.1246	32.1438	14.7723	14.0113	10.259	15.953	10.8526
FBgn0266557	kis	35.1065	31.5721	24.4737	12.3917	11.3102	8.0029	4.22329
FBgn0036389	ssp2	35.0589	24.3561	15.2299	22.4121	16.5028	18.2188	84.7745
FBgn0036547	CG17032	34.9663	211.892	98.7433	81.1134	56.9317	19.2599	50.2145
FBgn0261859	CG42788	34.9014	21.8119	18.1972	3.33819	1.30773	0.853098	8.40993
FBgn0035236	CG12004	34.8255	84.6269	75.3046	50.9445	57.7265	93.2495	122.827
FBgn0001257	ImpL2	34.8036	113.462	22.6802	43.2091	268.394	188.55	588.555
FBgn0023174	Prosbeta2	34.7957	24.8393	26.6941	52.0251	53.8468	67.6338	57.0394
FBgn0033867	Cpr50Ca	34.7797	2598.91	0.650317	1.61395	0.528432	7.42999	7.47116
FBgn0037424	Osi15	34.7728	1.52188	2.98391	0.706574	0	0	0
FBgn0038629	CG14304	34.6561	19.5899	122.955	80.3976	29.4359	12.4838	3.67812
FBgn0004926	eIF-2beta	34.6448	49.7423	35.3666	37.0053	29.1737	23.4664	7.34672
FBgn0062442	Cisd2	34.6108	211.891	135.63	82.3974	99.8547	78.457	33.4091
FBgn0033241	CG2915	34.6049	15.4311	18.9181	20.651	13.2622	8.10316	6.60097
FBgn0259139	glo	34.5279	37.6885	32.5136	36.4157	26.6063	27.3114	16.7813
FBgn0267690	CG46026	34.4984	0.191648	0	0.0466632	0	0	0
FBgn0001123	Galphas	34.4894	35.8956	26.9099	30.8886	32.0108	37.9715	74.3107
FBgn0001105	Gbeta13F	34.4566	32.7166	33.9931	43.9627	58.0351	60.4622	49.3985
FBgn0038545	CG7713	34.3154	37.5814	58.0566	67.1977	52.7694	20.7909	6.48813
FBgn0033631	Sod3	34.2743	0.33686	52.1896	267.794	302.184	927.767	1511.99
FBgn0024352	Hop	34.2356	62.3769	51.5582	59.1528	65.7598	44.8755	15.2994
FBgn0010516	wal	34.2303	50.8693	53.0725	40.2594	44.1582	42.8672	18.9763
FBgn0263650	CR43641	34.2226	30.0704	0	0	0	0.32388	4.5465
FBgn0032725	Nedd8	34.1708	22.2593	17.1644	18.8201	23.4879	17.8198	11.9936
FBgn0039994	conu	34.1237	24.4858	21.8134	25.0686	28.5541	28.651	27.1238
FBgn0061515	endos	34.1133	43.521	48.2569	53.5116	52.5615	74.9854	189.073
FBgn0020279	lig	33.9743	26.6138	23.877	30.9863	38.8215	66.7854	93.8772
FBgn0045073	Stim	33.9089	50.335	40.7431	42.4516	38.4656	42.2964	40.4234
FBgn0010548	Aldh-III	33.8949	216.326	245.709	21.8004	204.546	409.021	215.024
FBgn0011745	Arp1	33.8949	45.1475	32.1358	38.7875	73.5844	131.024	200.902
FBgn0034141	CG8311	33.8714	17.3674	17.1703	16.5843	14.9075	9.04671	4.55401
FBgn0040227	eIF-3p66	33.828	38.3026	41.795	26.5834	21.9806	19.4467	12.4719
FBgn0035032	CG4692	33.8101	220.899	160.456	91.9203	158.278	199.529	113.567
FBgn0029868	CG3446	33.7244	73.4152	48.6674	42.3444	48.4002	48.9049	32.1298
FBgn0001090	bnb	33.6929	10.309	421.364	130.409	75.0499	69.9854	56.1397
FBgn0033982	Cyp317a1	33.6694	10.895	7.38012	6.0425	12.2245	18.1484	85.6107
FBgn0035865	CG7201	33.66	3.65361	2.53062	3.42643	9.88428	16.6884	4.46967
FBgn0033121	Cyp6u1	33.6558	11.9217	4.05587	4.86917	5.12495	6.96399	8.86427
FBgn0036820	CG6852	33.6449	33.5538	32.6806	28.5668	25.2088	29.7649	29.5835
FBgn0039802	dj-1beta	33.6203	9.7049	7.33477	17.0179	11.5701	6.09899	4.24861
FBgn0002284	Prosbeta6	33.612	32.141	26.7809	54.0944	56.7575	55.7784	41.2804
FBgn0024804	Dbp80	33.6037	29.047	21.3061	21.4424	24.4687	28.4174	16.8576
FBgn0035872	CG7185	33.6005	18.5568	17.8319	15.5418	13.1938	6.21746	2.86517
FBgn0015623	Cpr	33.5976	12.6338	14.4417	41.0395	129.407	259.482	1049.03
FBgn0001308	Khc	33.5931	46.8992	31.4191	23.7859	38.8914	72.8803	137.122
FBgn0014189	Hel25E	33.5734	18.3043	13.7074	15.24	14.2329	8.50172	1.96042
FBgn0262107	CR42860	33.4963	22.4508	19.7007	14.7596	44.8257	105.52	81.9936
FBgn0026869	Thd1	33.4819	25.398	17.3585	17.8644	18.7872	17.5623	18.0248
FBgn0028689	Rpn6	33.3793	34.7388	25.2265	54.4097	64.7094	95.9049	97.0629
FBgn0265276	l(3)neo38	33.3562	28.1083	14.421	9.18161	15.4305	14.4333	51.5338
FBgn0010391	Gtp-bp	33.3539	36.2863	26.9838	16.26	12.9363	14.2357	11.0719
FBgn0263740	eIF-2gamma	33.3211	21.5655	24.9967	20.7179	15.3818	12.3685	5.00116
FBgn0032682	CG10176	33.2976	38.6809	33.9096	19.1724	15.8391	21.5876	58.3539
FBgn0019661	roX1	33.2559	14.2872	16.6694	20.8741	33.6034	22.4549	18.0216
FBgn0027556	CG4928	33.2347	60.0352	58.6958	86.8121	43.3993	53.6467	120.785
FBgn0030478	CG1640	33.205	15.7514	27.3102	67.0951	55.1144	45.421	81.6984
FBgn0001125	Got2	33.1811	3.60956	10.7221	28.6356	80.9427	154.263	129.066
FBgn0039697	CG7834	33.1027	44.0428	44.5956	50.2819	60.9139	86.1235	90.7828
FBgn0051360	CG31360	33.0969	14.8915	13.4997	13.9905	14.6178	8.73095	5.01277
FBgn0005536	Mbs	33.0787	22.147	31.7401	60.7335	101.827	88.0704	31.6852
FBgn0038195	CG3061	33.0569	35.3299	23.5052	33.2111	47.1805	58.6162	52.6763
FBgn0261822	Bsg	33.0515	42.7638	57.6775	82.0032	200.95	270.204	233.087
FBgn0039648	CG14515	33.0488	157.268	5849.83	1260.64	83.5439	3.89882	2.14491
FBgn0031322	CG5001	33.0264	31.6471	85.889	201.214	301.001	287.151	191.519
FBgn0083167	Neb-cGP	33.026	88.994	43.1029	33.5174	55.2307	52.8913	34.8942
FBgn0040279	Osi14	33.0183	40.9411	1.14427	0.136665	0.0544178	0.0742163	0.125794
FBgn0030334	Karl	33.0013	14.3348	6.14495	3.64266	3.11144	3.45716	3.48891
FBgn0025381	rush	32.9742	29.5738	30.9686	35.2172	38.4696	45.1704	49.3568
FBgn0033352	PAN2	32.9322	13.2243	12.1921	12.3908	11.6019	10.1822	16.5438
FBgn0260011	NimC4	32.8481	17.531	28.5317	19.9692	19.3312	19.701	9.64275
FBgn0032292	CG6750	32.8031	14.931	20.0602	24.0045	16.0176	15.1992	5.04116
FBgn0016917	Stat92E	32.7362	8.95451	13.0991	11.4201	11.7479	7.81432	41.8497
FBgn0040532	CG8369	32.7149	6.68199	12.1947	11.0089	18.7495	92.4495	253.374
FBgn0036769	Tsp74F	32.7022	90.1098	88.796	194.609	255.375	488.517	361.058
FBgn0050089	CG30089	32.6907	20.4191	18.6511	19.4351	28.3091	30.5258	11.3237
FBgn0014009	Rab2	32.6571	47.6924	34.9435	29.2671	34.1018	45.2172	50.4336
FBgn0035853	UbcE2M	32.5542	55.2181	23.2842	18.6254	12.1333	27.6307	92.1935
FBgn0033246	ACC	32.5053	15.2082	14.6501	7.92633	4.00931	6.08837	4.33875
FBgn0263289	scrib	32.4926	28.6109	69.7979	95.7698	129.322	102.697	65.1001
FBgn0263351	AP-2mu	32.413	25.0892	16.9702	23.5038	19.7862	18.9658	11.9194
FBgn0266667	Exo70	32.3437	5.00597	6.57873	4.3647	4.49172	5.41492	7.93296
FBgn0033886	Rpn13	32.2581	22.0015	21.3706	46.4629	45.3305	62.57	62.5427
FBgn0001220	Hsc70-5	32.2447	95.4309	32.8925	30.6106	37.3379	27.6073	14.1279
FBgn0015797	Rab6	32.2361	25.6468	24.8408	31.911	46.519	48.6008	41.9851
FBgn0000575	emc	32.1982	90.3664	59.5031	56.1164	81.6925	88.1829	129.828
FBgn0010288	Uch	32.189	10.3511	8.59757	10.7511	12.7109	11.2511	9.28591
FBgn0031971	Sirup	32.1151	134.685	97.6503	248.614	755.454	513.677	177.63
FBgn0038412	Zip89B	32.1058	32.4756	34.1916	22.449	7.45514	6.87953	17.5402
FBgn0035533	Cip4	32.061	51.5183	50.2779	20.6655	39.6489	101.759	55.1015
FBgn0035016	CG4612	32.0124	25.5602	14.9552	12.6634	8.87665	6.62326	8.62914
FBgn0026874	CG13358	32.0102	3433.01	2.28639	0.313457	0.0994011	0.220583	0.521546
FBgn0028969	deltaCOP	31.9423	35.8572	18.9508	16.8497	17.1508	19.2804	21.5426
FBgn0041184	Socs36E	31.939	20.6419	17.2913	12.4069	8.10242	5.5773	116.969
FBgn0086708	stv	31.9383	5.41671	46.5386	143.816	191.449	281.835	293.921
FBgn0030638	CG11655	31.8825	210.213	31.5342	16.1391	10.4541	4.50278	11.6717
FBgn0250791	alphaSnap	31.798	36.599	31.1153	27.0509	23.6868	37.047	40.9095
FBgn0250843	Prosalpha6	31.7273	15.1802	14.6997	43.3514	48.0005	42.9313	30.4936
FBgn0003209	raw	31.7214	24.7309	15.5861	9.89341	6.56876	11.3051	299.417
FBgn0030703	MSBP	31.7178	72.1211	48.174	50.3978	57.9864	67.4783	73.5581
FBgn0260799	p120ctn	31.7039	27.7189	22.0342	27.6701	29.0631	34.6134	33.4802
FBgn0020620	RN-tre	31.6439	29.7863	13.1105	15.0505	21.4082	16.26	34.7008
FBgn0250876	Sema-5c	31.6324	23.5355	17.9828	24.5866	19.2291	11.67	18.4662
FBgn0015509	Cul1	31.5531	41.1692	13.4742	15.2814	18.0502	52.4643	100.55
FBgn0031037	CG14207	31.5409	37.918	30.9699	30.5065	39.5573	27.9582	41.3802
FBgn0031145	Ntf-2	31.5283	13.3952	13.1306	21.8664	29.6912	36.7618	23.6683
FBgn0027601	pdgy	31.4947	80.1386	41.8888	18.1366	35.9087	122.73	91.3844
FBgn0051676	CG31676	31.4833	77.7724	1062.38	1036.82	873.757	381.223	146.182
FBgn0082598	akirin	31.4313	37.4594	26.0973	25.9369	33.8375	38.9619	52.9862
FBgn0032420	CG6583	31.3927	37.6396	58.4651	83.8875	74.2164	39.9166	16.9787
FBgn0003231	ref(2)P	31.3917	56.7977	188.536	196.354	130.821	105.728	127.601
FBgn0039704	neo	31.3553	0.463126	14.8594	10.5756	2.64161	0.229135	0.151234
FBgn0004687	Mlc-c	31.3145	316.272	357.902	889.117	2365.67	4494.24	3062.29
FBgn0027660	blot	31.2953	5.1898	7.08309	2.05835	2.88196	21.824	23.495
FBgn0037734	trbd	31.2886	11.6591	6.77382	7.09504	7.18361	11.7623	22.3219
FBgn0259173	corn	31.27	27.1104	5.85985	1.73071	1.02637	4.61425	119.861
FBgn0263852	l(2)k12914	31.1966	22.8147	15.6663	10.1797	11.5896	6.498	3.05397
FBgn0039132	AP-1sigma	31.1534	35.0058	29.4547	37.3373	38.2547	36.4254	29.0083
FBgn0033702	CG8854	31.1528	136.965	536.869	507.123	66.9465	20.2194	5.14011
FBgn0036773	CG13698	31.1412	15.8953	33.2571	23.7334	16.2562	9.35204	16.9815
FBgn0032884	Pomp	31.1096	34.353	39.3094	43.957	42.9227	42.9372	33.0465
FBgn0024734	PRL-1	31.0626	48.0688	40.4378	34.0319	44.3382	46.8008	41.381
FBgn0021967	Pdsw	31.0184	51.8769	21.7952	27.2389	29.8048	27.5786	26.2479
FBgn0039112	CG10219	30.9948	50.3906	19.155	25.8473	28.1933	28.5733	14.4656
FBgn0085478	CG34449	30.978	12.5806	13.7891	7.00658	6.6009	5.5523	6.4914
FBgn0033936	CG17386	30.9332	13.4126	14.7925	8.08696	102.894	1100.66	3754.6
FBgn0063670	CG40228	30.9267	32.5022	30.952	31.3876	23.5276	22.2643	17.3768
FBgn0030733	CG3560	30.9025	114.616	66.6866	41.7467	57.7676	60.5534	45.2921
FBgn0037092	M6	30.8849	72.1191	21.0327	39.9604	43.1449	47.6996	72.4189
FBgn0039260	Smg6	30.7859	24.7243	22.7211	25.7019	26.2576	31.2825	48.3473
FBgn0261873	sdt	30.7831	46.2914	54.9362	37.7913	18.7492	13.3044	122.99
FBgn0027785	NP15.6	30.7783	39.6483	27.7031	29.3743	32.06	42.6405	38.2709
FBgn0027885	Aac11	30.7714	33.582	33.2108	20.9936	23.6386	20.5357	9.38931
FBgn0013576	mtd	30.7606	37.7011	55.3148	20.3566	23.1148	120.937	320.879
FBgn0032429	CG5446	30.6681	74.1212	29.1676	28.2808	22.3928	20.9777	12.6616
FBgn0263118	tx	30.6289	4.3122	86.356	165.497	122.187	50.3981	20.8804
FBgn0010772	Xe7	30.5823	21.3491	22.3473	17.9855	14.1408	12.5119	11.4786
FBgn0029941	CG1677	30.5315	17.1134	18.9708	16.5859	15.4366	15.4804	18.5274
FBgn0264895	RapGAP1	30.3965	29.5653	65.4792	32.7632	32.9234	29.3515	25.5779
FBgn0263006	Ca-P60A	30.3574	42.638	47.2161	41.4383	41.7766	38.2426	34.9775
FBgn0039682	Obp99c	30.3345	32.5849	16.1625	9.21298	6.1367	9.45988	21.0407
FBgn0260747	CG5010	30.2972	64.9254	34.1754	34.3353	35.607	39.0966	23.9781
FBgn0001186	Hex-A	30.285	32.8534	17.6119	18.6939	15.9754	19.0506	50.5426
FBgn0262127	kibra	30.2805	39.8167	52.0311	33.0556	32.9451	28.6716	14.1979
FBgn0004066	Prosalpha4	30.2088	20.6986	17.9874	42.3711	41.7405	48.1616	36.8351
FBgn0053526	PNUTS	30.1719	25.3142	26.4789	24.0665	26.1513	19.3467	15.0361
FBgn0262559	Mdh2	30.135	78.5811	63.1102	68.5781	89.8105	96.6053	58.8728
FBgn0015949	hrg	30.0389	20.1602	20.3386	16.1962	19.7835	16.4809	20.9519
FBgn0011747	Ank	30.0348	39.4337	45.8538	53.8816	71.951	81.289	67.2497
FBgn0036239	Pop2	30.0255	23.8531	18.9514	30.6373	38.203	42.0318	25.874
FBgn0013303	Nca	29.9853	41.4501	44.1535	46.543	55.4077	44.332	35.7685
FBgn0037899	RpL24-like	29.8994	30.8302	45.6942	36.9492	32.4317	43.204	59.4506
FBgn0036318	Wbp2	29.8527	33.5164	22.5766	23.4991	48.5973	101.369	89.186
FBgn0263973	jv	29.8181	1.23881	7.97689	5.16951	15.4649	24.1763	30.8663
FBgn0014037	Su(Tpl)	29.7203	45.0052	22.3638	22.0336	19.1732	32.6686	86.0796
FBgn0052190	NUCB1	29.7111	53.8944	71.5973	57.2355	42.2431	52.0285	53.5975
FBgn0032961	CG1416	29.697	29.6563	26.8788	31.3847	26.1326	26.1595	7.60988
FBgn0028527	CG18507	29.6798	80.5364	68.0916	76.0688	100.405	218.047	228.738
FBgn0261243	Psa	29.6193	12.4194	6.62349	13.9678	8.69322	4.29536	134.188
FBgn0041775	tral	29.6162	29.4375	27.6244	30.1329	31.611	35.2051	49.0978
FBgn0029518	CG13376	29.4912	1203.77	130.193	3.78692	0.625437	0.29091	0.302934
FBgn0261394	Prosalpha3	29.4829	19.0236	18.7175	46.1926	45.2216	53.9298	35.5563
FBgn0003390	shf	29.4362	2.57168	1.34936	0.539145	1.15329	1.3376	1.08682
FBgn0004647	N	29.4236	28.6666	30.8109	17.1637	10.6311	5.58819	5.35181
FBgn0053303	CG33303	29.4223	12.9264	9.43959	8.26082	11.1989	4.44571	2.06088
FBgn0035370	Non2	29.4191	20.6718	20.2721	20.8661	22.903	17.4573	7.39246
FBgn0039240	CG3744	29.4178	12.2419	10.0445	9.92348	6.40439	4.87893	5.27503
FBgn0004648	svr	29.3615	73.8749	155.041	53.2108	19.6156	11.5323	48.6471
FBgn0002787	Rpn8	29.3388	20.8073	26.2841	51.884	54.9804	66.4834	51.4172
FBgn0037440	CG1041	29.3299	37.4165	7.09142	4.41921	2.51992	1.96746	2.36792
FBgn0261269	conv	29.3278	30.1381	20.3959	10.0731	9.72147	14.5576	8.89427
FBgn0030752	CG9947	29.2819	43.5181	31.6527	31.5274	38.7563	59.9076	48.9412
FBgn0035104	CG13875	29.2481	51.8975	33.9195	11.2742	6.51736	3.07991	1.56703
FBgn0034159	CG15615	29.2028	19471.2	7.63724	13.3279	0.602533	0.522354	2.24954
FBgn0265313	CG44286	29.1547	30.3895	32.9754	56.736	175.8	689.778	1892.01
FBgn0026179	siz	29.1467	31.0631	25.3171	35.2275	33.7144	26.3011	59.7334
FBgn0023097	bon	29.1109	10.6564	13.439	10.5411	12.5795	12.4178	11.3542
FBgn0020235	ATPsyn-gamma	29.0867	88.7572	71.3547	48.1994	72.4855	93.1446	53.5323
FBgn0000578	ena	29.0433	19.3706	46.8589	49.2385	45.7676	107.992	334.955
FBgn0029715	CG11444	29.0153	28.2656	20.374	20.5231	22.9689	28.0151	15.3485
FBgn0025865	Cortactin	29.005	27.2182	33.1836	31.7527	26.3228	12.4754	3.69809
FBgn0038290	CG6912	28.97	20.0622	13.9979	4.50894	2.80443	2.51933	10.4236
FBgn0013278	Hsp70Bb	28.9652	7.42438	20.104	13.2406	9.6408	0.605465	1.74524
FBgn0011592	fra	28.955	5.29678	5.39159	2.37859	0.866108	0.46012	0.604133
FBgn0267698	Pak	28.9476	19.1845	16.6688	11.7762	8.79221	7.92462	9.0598
FBgn0264694	mgr	28.9414	7.65918	24.9833	47.65	56.705	34.6086	15.9711
FBgn0264816	koko	28.9392	13.6629	6.37673	4.02572	3.15079	1.00216	0.139531
FBgn0019890	Smg5	28.9085	40.7425	29.9234	22.145	21.4022	20.3842	27.9966
FBgn0036058	CG6707	28.9042	45.2938	26.8028	31.4387	28.1941	28.3315	36.3892
FBgn0039269	veli	28.8997	13.3014	15.3855	21.289	22.788	27.2453	25.5949
FBgn0036580	PDCD-5	28.8653	25.5523	15.9534	27.793	36.4932	30.0134	11.9969
FBgn0260944	Rbp1	28.8091	22.4369	9.77295	7.44395	9.08697	7.26693	5.33611
FBgn0000318	cl	28.8048	44.0058	33.3615	37.0435	34.7889	30.9751	20.3868
FBgn0052082	CG32082	28.7886	106.13	110.878	71.8791	65.8549	33.111	25.8046
FBgn0262126	Sec24CD	28.7858	20.4494	13.3233	12.2434	10.8229	12.0687	7.52564
FBgn0019948	Phm	28.7648	50.407	104.737	103.807	81.1348	58.6828	47.3629
FBgn0038738	CG4572	28.7541	9.29442	11.3724	21.969	19.8028	12.7112	7.5268
FBgn0013726	pnut	28.692	11.2482	21.8105	21.4722	22.6615	16.9226	8.76353
FBgn0039223	CG5805	28.6523	7.23819	1.86644	3.70996	4.6493	11.6335	7.97242
FBgn0032509	CG6523	28.6236	32.9568	33.5254	24.887	23.2207	32.2586	39.5994
FBgn0035522	CG1273	28.6038	2.0052	1.49437	0.168365	0.0338776	0	0
FBgn0022343	CG3760	28.5935	46.8962	36.3455	36.0669	35.0432	31.3222	24.2998
FBgn0021825	Dmn	28.5899	23.8012	20.0771	30.5497	49.205	70.9502	47.2424
FBgn0010812	unc-45	28.583	6.44539	27.423	23.6722	36.9566	59.1886	82.8314
FBgn0001104	Galphai	28.5409	30.0574	32.3199	28.1976	26.7929	31.4136	75.9282
FBgn0041342	Cct1	28.5334	19.3497	12.1938	8.24114	7.26962	6.91019	7.43652
FBgn0032897	CG9336	28.526	22.635	211.709	867.981	1170.25	1200.38	719.707
FBgn0266666	Sem1	28.4695	33.2659	36.4453	48.5803	48.5998	55.6728	61.9398
FBgn0085220	CG34191	28.3571	38.8101	22.7036	18.2028	13.7458	17.895	13.5029
FBgn0001235	hth	28.3392	6.84932	11.4114	6.10099	5.32095	5.42995	7.56063
FBgn0027594	drpr	28.3365	19.2464	25.9445	21.1903	19.8473	19.2011	33.9302
FBgn0029662	CG12206	28.2846	41.1426	25.4558	28.9911	20.492	9.10622	6.34505
FBgn0032196	CG5708	28.2357	22.8902	16.8529	16.9722	15.5857	12.2995	8.13108
FBgn0038256	CG7530	28.2291	35.5465	25.5082	17.9444	3.01918	1.68123	5.92467
FBgn0010380	AP-1-2beta	28.2136	25.4312	19.8059	24.4353	26.2378	27.3263	15.3108
FBgn0036745	CG7484	28.2017	9.44647	13.8717	11.2003	6.24103	2.40938	0.894458
FBgn0043070	MESK2	28.1817	33.1434	41.5935	39.7705	42.1284	41.2335	47.1893
FBgn0259483	Mob4	28.181	24.1495	19.9311	30.3281	37.3727	43.6378	35.2757
FBgn0029837	Tsp5D	28.1764	37.8181	10.3807	3.47138	3.09464	3.46513	3.02932
FBgn0039890	CG2316	28.1724	25.8894	25.56	16.575	19.5722	28.3323	37.2388
FBgn0266418	wake	28.0835	20.7785	21.5206	8.16397	2.47142	2.34043	14.4961
FBgn0015031	cype	28.0788	124.351	64.7377	66.3071	94.1682	113.993	100.312
FBgn0011642	Zyx	28.0762	21.3718	18.3091	13.9385	16.3652	15.9865	16.5752
FBgn0001987	Gli	28.0619	63.1413	87.6634	72.1645	104.213	109.201	53.5216
FBgn0085437	CG34408	27.9588	13.8992	14.1766	17.0119	17.7578	16.3519	14.3993
FBgn0266411	sima	27.9563	32.497	35.5607	37.6785	45.7698	39.8948	29.0481
FBgn0261609	eIF-2alpha	27.8609	23.5911	15.1622	20.7581	29.1945	29.8123	20.5821
FBgn0053156	CG33156	27.8452	15.2982	27.0106	54.2369	44.9744	57.2858	20.2273
FBgn0027598	cindr	27.8412	11.9256	25.834	18.9999	11.4569	17.2581	137.196
FBgn0039924	PIP4K	27.8279	31.8611	30.5617	29.4048	34.1651	56.8527	59.9413
FBgn0032363	CG6509	27.7475	27.9739	19.7585	16.1391	13.6986	10.4093	31.803
FBgn0030305	CG1749	27.7135	15.623	9.83512	7.56333	4.75908	3.29754	2.54586
FBgn0031047	Rcd-1	27.7107	36.0792	22.9209	22.4797	21.1753	20.0782	11.3635
FBgn0011361	mtacp1	27.6842	85.8164	28.757	29.8258	42.3775	39.7359	26.6179
FBgn0032330	Samuel	27.6802	14.7306	3.9349	1.69494	3.10292	7.71314	8.23344
FBgn0000173	ben	27.6469	28.3807	25.3091	30.6579	33.4027	34.6212	20.7489
FBgn0000562	egl	27.5815	37.2839	33.9358	32.6967	42.6016	43.1263	58.6221
FBgn0000084	AnxB10	27.559	20.1278	40.3166	71.0132	174.59	274.859	195.221
FBgn0010215	alpha-Cat	27.5487	38.084	33.5453	35.5505	36.8637	42.9006	78.5373
FBgn0267791	bl	27.4887	98.2642	47.2131	50.9696	71.5245	53.7567	44.0837
FBgn0034277	OstDelta	27.3989	15.9566	7.54029	6.94612	6.57071	2.77022	0.863926
FBgn0037643	skap	27.396	49.4357	22.8909	40.387	111.804	206.683	156.691
FBgn0034479	CG8654	27.3677	0.805884	2.67725	2.42454	2.22005	1.40983	0.226757
FBgn0063492	GstE8	27.3584	7.15552	9.85127	8.7834	10.5955	14.8327	17.2509
FBgn0262511	Vha44	27.3514	34.8257	42.8571	60.5326	175.444	371.27	343.641
FBgn0087013	Karybeta3	27.3242	29.4914	66.0461	62.5021	49.9595	48.6659	51.7897
FBgn0039869	CG1890	27.3006	11.9141	30.3188	73.1647	97.0105	82.3704	100.521
FBgn0030396	CG2556	27.2934	25.6335	39.3964	6.7617	2.39671	0.808075	1.12258
FBgn0035232	CG12099	27.2444	46.7472	43.9707	32.487	32.8383	22.9837	38.0667
FBgn0011336	OstStt3	27.2406	16.5542	11.5771	9.24606	7.73834	3.99983	1.17428
FBgn0003495	spz	27.1607	21.4553	24.6126	20.3072	14.1131	21.2433	33.4538
FBgn0264743	CG44001	27.1495	37.9251	59.1866	90.8336	146.142	115.556	87.4561
FBgn0031897	CG13784	27.1147	11.2203	5.90396	2.8336	1.06425	6.37661	45.6616
FBgn0259938	cwo	27.1057	52.1823	19.3148	10.8984	14.3695	6.36448	4.59844
FBgn0030744	CG9992	27.0599	29.6282	15.4027	12.7802	18.003	27.6486	14.4402
FBgn0264962	Inr-a	27.0445	24.3657	16.5684	15.6931	14.669	17.3339	40.2398
FBgn0032297	CG17124	27.0421	24.1762	16.1294	4.01437	1.84379	2.05076	5.58587
FBgn0024947	NTPase	27.0377	16.0564	13.7259	12.5155	12.8628	11.8953	44.1851
FBgn0031883	Caper	27.0274	31.7604	32.7799	30.0454	30.3978	23.7402	16.9885
FBgn0259222	CG42322	27.0272	5.07031	6.44179	1.61144	3.95307	6.90326	12.7169
FBgn0004888	Scsalpha	27.008	67.8055	30.2765	56.5799	94.0205	110.775	79.6965
FBgn0005649	Rox8	27.0057	22.6692	15.6402	21.6838	22.2942	22.5817	40.2806
FBgn0028684	Rpt5	26.9877	32.7104	20.4621	43.1843	45.0152	62.2109	56.3233
FBgn0004057	Zw	26.9702	6.138	10.5334	9.36533	19.0259	55.5267	44.6462
FBgn0002973	numb	26.9624	29.8416	36.6865	43.439	47.6888	54.2309	63.1035
FBgn0265968	Tfb5	26.9078	14.0561	10.7637	13.8441	13.5806	12.1198	6.29958
FBgn0034072	Dg	26.8966	19.3552	16.3232	12.0121	7.69745	5.38622	5.1569
FBgn0014388	sty	26.8918	36.0382	18.0944	12.6316	12.7909	15.7263	39.4582
FBgn0052000	CG32000	26.8812	26.2098	23.9998	26.0686	29.886	28.7292	24.3648
FBgn0028687	Rpt1	26.8697	28.6002	23.0617	55.2742	60.7663	103.935	87.5687
FBgn0039977	CG17454	26.8037	41.1088	27.6132	22.8568	21.7273	31.4542	32.0549
FBgn0011225	jar	26.7928	65.8199	9.85854	3.06224	1.08021	5.76869	46.7294
FBgn0037360	CG2182	26.7749	17.8127	16.8168	20.9666	23.4646	23.9184	35.1935
FBgn0016926	Pino	26.7223	39.1353	36.5078	45.4175	49.2174	600.515	6436.37
FBgn0037007	CG5059	26.7058	38.3853	22.6631	26.649	32.3871	14.1029	150.256
FBgn0037666	CR16735	26.6817	0.175915	0	0.0856652	0	0	0
FBgn0031781	Arpc4	26.6766	32.9844	23.9007	24.9031	38.8012	54.4096	48.7016
FBgn0015805	Rpd3	26.6709	7.26589	5.52402	5.89101	5.48853	4.94626	1.26411
FBgn0082585	sprt	26.661	27.0431	4.85	8.33059	4.71364	4.78524	8.89295
FBgn0032246	CG5168	26.6224	22.7584	14.1353	15.4489	14.5259	15.6505	15.8125
FBgn0033252	CG12769	26.5871	3.14962	149.496	161.874	75.8082	13.0017	2.65096
FBgn0266490	CG45089	26.5683	131.476	51.2043	43.1585	55.7956	59.4555	43.5998
FBgn0001229	Hsp67Bc	26.5281	20.787	14.6575	2.54368	0.611596	0.0820364	0
FBgn0086361	alph	26.5112	17.4528	13.9661	21.3608	30.0261	51.6661	101.223
FBgn0031673	CG31650	26.5035	5.5619	10.1284	15.921	14.5463	8.7199	4.57374
FBgn0027493	AdSS	26.4846	30.4125	16.9854	19.7835	13.7478	8.70397	6.49676
FBgn0039480	Cpr97Ea	26.4796	545.824	1406.52	576.137	44.4968	5.62792	36.2473
FBgn0003607	Su(var)205	26.4766	13.219	21.5525	32.0363	31.0643	22.0631	7.80149
FBgn0035715	CG10103	26.4543	31.3809	16.6403	15.1397	33.4299	49.8293	87.7948
FBgn0262872	milt	26.4223	21.7908	20.4456	23.5018	22.523	20.7529	42.5172
FBgn0035390	scramb2	26.4027	57.6609	26.1339	28.795	22.0006	21.3973	21.9611
FBgn0031830	CoVb	26.3807	123.464	84.2896	59.2253	76.404	86.5131	51.7017
FBgn0085424	nub	26.3743	27.6407	39.1948	37.4614	43.6566	41.5791	42.6812
FBgn0027496	epsilonCOP	26.3723	32.2713	17.9578	17.8172	18.2188	24.5415	18.4561
FBgn0053229	CG33229	26.3493	24.9051	27.6665	13.9292	14.6706	24.576	70.6548
FBgn0063493	GstE7	26.3206	3.96276	6.40716	5.85143	6.85589	5.78433	4.37911
FBgn0262734	Rbp2	26.3038	35.7346	38.1135	42.3043	52.6776	47.7678	35.8758
FBgn0260798	Gprk1	26.2768	26.2552	20.5301	16.1368	17.2841	20.8145	16.2104
FBgn0028691	Rpn9	26.2658	20.1414	19.379	44.9749	42.9119	52.4078	32.9478
FBgn0002121	l(2)gl	26.2593	14.2477	21.0856	15.1303	23.2413	25.2802	17.181
FBgn0036667	CG9669	26.2293	10.577	10.7551	10.6708	8.46614	2.49996	2.805
FBgn0037530	CG2943	26.2196	15.9818	21.1362	24.9748	18.6505	13.2338	7.07284
FBgn0010825	Gug	26.2149	17.7906	14.9268	12.6481	11.2472	13.4641	11.8796
FBgn0004419	me31B	26.2026	20.767	17.4264	18.7597	24.8209	27.9735	20.0966
FBgn0263594	lost	26.2013	31.4696	63.8863	90.6944	163.102	288.012	229.022
FBgn0011509	SrpRbeta	26.1751	29.4393	10.9527	5.15866	4.75049	3.52134	1.71199
FBgn0032666	CG5758	26.1713	516.589	25.7046	1.31475	1.60154	1.93485	43.1863
FBgn0263916	Ent2	26.1291	6.77095	35.9667	23.3307	12.3827	6.07974	2.40532
FBgn0265991	Zasp52	26.107	13.9964	7.42325	4.7322	2.18032	2.35336	4.10495
FBgn0030114	CG17754	26.0619	22.0324	30.7429	24.7188	7.59727	5.84666	60.4178
FBgn0036728	CG7580	26.0607	102.646	28.8453	36.7204	45.7475	64.1009	39.3617
FBgn0036740	Vps60	25.9863	37.5793	47.9599	40.8161	53.0234	90.8533	95.4884
FBgn0010333	Rac1	25.9725	22.1031	21.165	27.3868	31.798	24.9262	19.4942
FBgn0262579	Ect4	25.9682	42.7773	26.3383	12.2886	8.64267	12.9285	59.332
FBgn0005411	U2af50	25.9658	22.2149	19.3985	25.9687	21.5427	22.1716	16.9977
FBgn0036666	TSG101	25.9636	19.0479	15.1951	20.6831	25.5521	26.8922	25.6549
FBgn0069923	CG41128	25.961	60.8799	20.4294	29.1884	26.7252	45.5624	40.318
FBgn0069242	eca	25.9453	25.1405	13.7954	14.1666	11.9394	10.2973	9.31998
FBgn0039507	mrt	25.906	22.6445	27.118	19.7113	20.4122	14.8701	17.6475
FBgn0032208	CG5604	25.9024	39.1766	36.3071	19.678	18.9223	25.0431	53.4174
FBgn0033028	CG11665	25.8694	31.18	31.1818	31.8607	26.614	24.3277	24.1161
FBgn0243512	puc	25.8582	19.2034	9.58936	5.94915	6.5241	9.24106	25.6074
FBgn0035397	CG11486	25.8394	19.1817	37.9829	46.2442	37.3319	39.2413	19.6286
FBgn0030791	CG9132	25.7896	13.5936	16.0337	13.4525	15.3795	14.8439	18.7732
FBgn0023172	RhoGEF2	25.7873	21.1032	18.8158	16.0909	18.2597	27.1767	24.3843
FBgn0038533	CG7523	25.7856	9.13314	9.82643	15.3032	15.2775	20.9949	14.7538
FBgn0261403	sxc	25.7783	33.2079	24.7094	25.4248	27.8281	30.9991	29.0167
FBgn0028490	CG31705	25.7663	96.9172	33.9708	64.6351	118.17	99.2682	259.877
FBgn0011672	Mvl	25.7376	18.6113	21.5966	18.7177	21.9208	4.2386	11.4392
FBgn0016120	ATPsyn-d	25.7245	122.473	64.5367	61.5952	85.9629	94.0617	51.5027
FBgn0053111	CG33111	25.7024	32.4064	29.1955	50.1077	35.9956	14.7365	11.8555
FBgn0031268	cold	25.6912	31.7983	91.0268	95.4728	87.7945	44.0168	18.5896
FBgn0263773	fok	25.6453	935.529	74.0317	193.739	431.711	522.515	328.855
FBgn0024273	WASp	25.6239	5.99221	8.87024	15.7757	15.2949	12.1016	9.89242
FBgn0031568	CG10019	25.6221	15.115	1.30143	0.0502793	0.0437873	0	0.080382
FBgn0041191	Rheb	25.6158	30.4357	37.7061	29.6929	30.4544	24.8757	18.959
FBgn0086377	Syx7	25.6141	25.7911	27.7884	31.0288	25.7262	42.3999	60.124
FBgn0034051	Mlf	25.5998	33.7817	28.5395	27.6184	25.4985	25.427	21.7931
FBgn0262519	Mi-2	25.5638	25.8174	17.4862	14.6935	12.7774	10.0862	9.87662
FBgn0011571	caz	25.5622	17.7473	17.67	18.9939	16.3962	17.3534	15.3435
FBgn0031050	Arp10	25.5488	19.1473	15.0051	12.0049	15.5076	14.3051	12.4468
FBgn0036505	CG7945	25.5307	27.4551	21.3978	23.1343	24.9297	26.0331	15.7512
FBgn0032643	CG6453	25.5237	12.8752	10.6903	7.72891	6.89621	3.89002	1.83176
FBgn0005672	spi	25.52	27.7703	31.8076	21.4811	13.422	10.0488	14.5169
FBgn0034049	bdg	25.4925	4.06727	8.80782	18.8692	22.6489	46.9359	162.94
FBgn0024179	wit	25.4813	10.7539	9.93796	2.12352	1.90229	1.16669	2.53591
FBgn0265052	St3	25.4782	26.0714	16.2189	3.51335	2.554	0.674798	1.01201
FBgn0261564	CG42678	25.4536	23.0728	17.8831	16.8321	36.3309	259.015	2874.81
FBgn0003567	su(Hw)	25.4493	13.1075	5.76497	7.58312	9.00481	12.9329	6.27247
FBgn0035439	CG14961	25.4472	11.1633	8.04369	2461.92	40717.3	66495.7	20577.4
FBgn0058196	Maf1	25.4468	40.6259	25.23	26.9832	30.9559	41.6077	60.5457
FBgn0038881	CG16791	25.4317	11.2404	18.3788	16.0448	16.3375	10.0598	16.6916
FBgn0259978	vlc	25.4255	22.8072	19.6165	31.468	29.1584	17.8843	10.8619
FBgn0020764	Alas	25.4188	24.6477	16.8265	13.3006	14.5629	16.2951	13.6049
FBgn0030592	CG9514	25.408	15.9869	57.2057	3.00884	1.56151	0.153838	0.669959
FBgn0264090	CG43759	25.3656	14.5235	19.3701	10.1946	4.66743	1.45264	2.2165
FBgn0051729	CG31729	25.3316	31.9259	30.2902	29.8798	24.6577	22.3292	40.4332
FBgn0000115	Arl1	25.3136	16.8181	11.9803	16.7944	18.5652	8.95257	4.9502
FBgn0031228	CG11455	25.2943	140.001	68.8081	38.4173	48.9385	60.7992	48.9455
FBgn0015380	drl	25.2813	23.2694	57.7869	9.84687	2.24663	0.434653	3.51494
FBgn0264089	sli	25.2492	12.3586	12.1184	7.14941	2.91528	1.09443	1.39856
FBgn0032000	CG8372	25.2484	24.356	19.4877	24.4613	19.3667	13.8756	7.15512
FBgn0030357	Sclp	25.2454	24.9644	3.37172	0.126717	0.154207	0.770925	16.0123
FBgn0267751	CR46082	25.2427	0.19239	0.0624858	0.0779447	0.0230652	0.139787	0.114153
FBgn0263241	Mocs1	25.2037	31.2968	18.777	12.5553	15.4545	11.1692	20.4034
FBgn0034501	CG13868	25.1898	6.82798	12.8807	5.02995	12.0488	10.0325	56.1109
FBgn0038638	CG7702	25.1841	30.8988	14.5624	1.61456	0.96773	28.7244	38.2196
FBgn0053556	form3	25.1767	5.82453	12.5306	11.3738	60.1335	454.006	1240.45
FBgn0026259	eIF5B	25.1662	24.8463	16.8302	13.8323	12.181	10.7995	12.3012
FBgn0263706	CG43658	25.1636	56.3185	21.2673	12.8289	10.6346	16.412	58.3979
FBgn0042135	CG18812	25.0918	44.9006	56.6848	119.538	158.935	148.626	111.931
FBgn0015268	Nap1	25.0542	22.7624	63.3787	43.8162	35.8127	29.8838	23.4102
FBgn0038421	CG17931	25.0182	44.5926	38.0619	30.8376	21.4212	24.0918	13.7294
FBgn0039466	CG5521	25.0036	7.02416	5.74988	4.8783	5.0419	4.12575	4.06834
FBgn0037956	CG6959	24.9953	18.9326	24.7098	12.8352	12.6361	7.93874	14.2621
FBgn0267734	CR46065	24.9938	32.9825	20.4758	7.998	6.09676	4.03903	3.8299
FBgn0004363	porin	24.9634	230.379	90.7526	63.5615	61.1475	58.0695	26.9315
FBgn0035907	GstO1	24.8581	41.2295	31.1724	15.2671	14.7299	8.76805	4.29168
FBgn0263603	Zn72D	24.7952	12.4467	8.99924	11.3407	11.7615	7.59005	3.72448
FBgn0266409	CG45049	24.789	23.8271	20.3346	19.1908	23.9152	54.8545	64.9614
FBgn0026380	Prosbeta3	24.7867	13.1172	15.1496	36.6193	33.0657	32.3664	24.3495
FBgn0039914	mav	24.7728	49.453	42.6042	46.3469	37.7469	27.276	24.0744
FBgn0040475	SH3PX1	24.7691	18.8151	15.3637	18.5483	23.4624	43.0323	40.2445
FBgn0015298	Srp19	24.7669	30.0123	18.6598	15.8893	16.0085	16.2118	15.6008
FBgn0262739	AGO1	24.7173	26.277	27.5618	33.1193	40.6899	35.9777	30.7097
FBgn0031952	cdc14	24.7082	18.6743	21.6869	17.5401	16.2689	10.1726	18.3405
FBgn0265003	koi	24.7004	40.3678	29.9729	44.0893	65.5723	118.992	78.0192
FBgn0014906	Hydr2	24.6853	14.4386	12.0694	17.8638	14.9775	11.2802	6.41609
FBgn0035989	CG3967	24.68	11.0503	20.7303	7.12385	13.8187	9.36226	10.379
FBgn0052365	CG32365	24.6767	10.1919	18.6615	5.05261	3.1505	4.72711	7.55155
FBgn0015569	alpha-Est10	24.5871	25.5657	25.1668	7.11393	0.762189	1.4725	100.199
FBgn0261279	lqfR	24.5853	12.012	15.8731	22.1761	26.6349	28.2549	18.931
FBgn0033688	Prp8	24.5514	10.757	11.9069	6.3619	6.37255	2.96355	0.900302
FBgn0025790	TBPH	24.5466	20.3709	14.465	16.9055	15.2603	11.4856	11.1669
FBgn0021895	ytr	24.5375	9.54776	9.86088	10.393	9.57355	6.39498	2.4629
FBgn0263911	CoVIII	24.5253	74.3656	42.215	28.2549	54.0724	50.474	49.7748
FBgn0261284	bou	24.4992	93.0756	79.2883	88.5085	88.6426	68.605	32.8842
FBgn0262582	cic	24.485	20.2228	22.1899	12.3577	14.2746	11.1275	11.4494
FBgn0036842	CG3797	24.4484	23.7139	12.2139	7.89431	3.52521	3.14895	61.5691
FBgn0023213	eIF4G	24.4385	45.6188	32.8946	29.6441	32.4284	33.5145	16.6525
FBgn0033757	muskelin	24.4313	5.23463	2.96819	3.74016	3.21781	2.85499	4.82103
FBgn0032216	CG5384	24.4028	14.5953	14.449	31.5027	33.816	38.0219	28.0203
FBgn0031030	Tao	24.3956	24.5455	36.3303	28.1705	24.0258	17.4504	22.9126
FBgn0000662	fl(2)d	24.3243	22.8753	23.1704	21.188	20.9982	18.5857	20.7412
FBgn0029804	CG3097	24.2929	14.6221	0.12358	0.375948	0.941551	12.0345	87.5865
FBgn0010583	dock	24.2737	15.4285	15.0353	12.1342	10.1548	7.3455	15.0038
FBgn0031629	Clect27	24.2353	147.155	462.553	1044.74	1286.5	604.754	160.098
FBgn0036279	Ncc69	24.2249	5.08072	5.88704	4.02386	49.5649	330.604	213.81
FBgn0004512	Mdr49	24.2136	14.4007	10.2233	2.84335	1.64545	1.04849	3.98627
FBgn0039303	CG11857	24.1982	34.333	19.7692	20.8846	25.5326	31.6473	19.3619
FBgn0041781	SCAR	24.1288	27.1922	33.9554	28.4564	18.8783	17.0269	17.1082
FBgn0030802	CG9099	24.116	28.7826	17.5653	19.9447	19.7129	23.6162	14.8095
FBgn0031662	CG3792	24.116	4.10927	2.61059	6.11707	6.05577	2.07172	0.984353
FBgn0085802	18SrRNA:CR41548	24.1041	17.5739	28.4444	20.5745	28.2975	20.9352	36.9744
FBgn0028983	Spn55B	24.0658	6.68297	3.92677	4.55861	5.37147	6.28306	12.2633
FBgn0046875	Obp83g	24.0585	407.245	304.659	34.5779	9.64669	6.70244	6.26795
FBgn0263231	bel	24.0116	42.2061	24.5849	27.4388	32.2877	55.9733	78.3483
FBgn0034372	Gint3	23.9923	12.7117	14.9452	14.1857	18.6637	25.1204	52.9252
FBgn0033875	CG6357	23.9825	3.6016	10.72	15.1737	55.0822	129.972	187.331
FBgn0085484	Pdxk	23.9684	13.2745	2.95266	5.63544	6.27787	6.71504	4.89222
FBgn0263198	Acn	23.9631	15.3821	15.758	15.1456	13.9678	9.42344	3.41858
FBgn0033021	CG10417	23.9596	25.7813	20.7908	17.6429	18.125	19.53	9.58002
FBgn0011455	l(3)neo18	23.9083	57.5706	45.5144	35.2048	35.5258	36.1601	28.6187
FBgn0021768	nudC	23.8953	19.8161	5.03563	3.77786	4.1486	4.08284	5.01544
FBgn0053523	Vap-33B	23.8865	33.0995	17.3535	18.4104	10.3262	8.54528	69.0131
FBgn0263993	CG43736	23.8707	10.5403	12.9558	13.4679	11.3911	12.135	11.0379
FBgn0250814	CG4169	23.8557	86.475	46.7337	45.7949	57.1666	65.923	40.9758
FBgn0015239	Hr78	23.7141	23.146	16.6306	17.4776	28.4043	37.668	37.9234
FBgn0032997	CG17486	23.6713	33.6872	14.3194	14.6371	16.117	23.8071	29.8386
FBgn0032242	CG5355	23.6568	23.6132	18.4232	22.3445	22.8656	20.5522	9.96614
FBgn0023528	CG2924	23.6348	30.4097	20.1133	18.1692	16.3049	21.0679	49.5647
FBgn0259143	CG42258	23.6319	21.528	18.2138	25.1374	101.32	211.019	249.515
FBgn0025355	SuUR	23.628	8.69888	15.0581	5.80918	3.60429	1.31488	0.736681
FBgn0005659	Ets98B	23.6244	6.44364	15.5579	10.071	8.97408	10.4905	15.4891
FBgn0036814	CG14073	23.6115	5.71394	9.23007	9.24336	10.2888	18.6114	8.46271
FBgn0004049	yrt	23.6112	25.9427	27.51	23.0309	18.982	12.7506	7.42978
FBgn0032029	CG17292	23.6087	37.7325	30.2731	13.5807	5.80802	8.8876	13.5353
FBgn0031646	CG2837	23.6073	182.104	230.973	327.758	290.341	97.6654	27.3526
FBgn0010350	CdsA	23.5942	9.75058	12.0498	18.2823	17.1666	15.6941	10.6185
FBgn0051472	sgll	23.5909	0.913897	15.5853	32.9424	34.5554	30.8386	20.8739
FBgn0038602	CG7126	23.5861	1.28465	1.44457	0.727322	0.289609	0.190082	0.509228
FBgn0039889	Arl4	23.5856	19.7844	20.4214	19.6978	19.2272	19.611	20.711
FBgn0260049	flr	23.5845	8.62817	7.02573	10.1022	13.2439	14.986	87.9638
FBgn0030605	CG5548	23.5782	42.5196	29.5582	26.9581	29.5415	27.8958	21.4335
FBgn0037199	CG11137	23.577	25.4544	22.2781	28.9951	21.1155	19.6975	9.52238
FBgn0032746	CG10470	23.5755	22.5662	16.3442	21.6781	15.1477	8.4558	5.9234
FBgn0263601	mib1	23.5721	14.2264	10.6419	13.8122	15.3643	13.8651	18.1426
FBgn0037913	fabp	23.5506	8.68893	7.03172	3.23019	2.26014	3.13517	1.88097
FBgn0000099	ap	23.5052	38.7858	50.2431	21.6196	21.7432	37.1296	114.998
FBgn0003071	Pfk	23.4891	8.28945	37.3016	5.86122	8.55629	6.10362	9.6762
FBgn0035987	CG3689	23.4787	15.4057	12.9651	14.2896	13.4087	5.90289	2.47946
FBgn0040285	Scamp	23.4654	29.0386	14.9646	17.4964	17.0453	14.5433	12.226
FBgn0035592	CG10674	23.4516	11.9957	22.0464	18.5184	20.2272	18.064	9.05902
FBgn0260442	rhea	23.4322	34.1956	50.201	83.4864	97.4984	72.2838	38.4687
FBgn0035830	CG8209	23.4136	11.2782	10.5091	14.7265	16.4704	15.8009	10.0908
FBgn0027580	CG1516	23.4055	1.62235	17.6198	14.7037	22.8394	411.19	365.782
FBgn0052179	Krn	23.3747	8.78667	13.5094	14.3088	14.2966	15.9025	26.1098
FBgn0051163	SKIP	23.3406	10.1923	9.54146	2.41708	0.95425	0.3661	0.874881
FBgn0000261	Cat	23.3398	733.215	373.419	1289.64	1120.48	921.37	1095.78
FBgn0037220	CG14641	23.3266	10.2903	7.15901	9.60345	11.9228	14.0151	11.6986
FBgn0051710	CG31710	23.3247	14.8343	17.2945	3.65165	3.1729	21.8769	8.35845
FBgn0026409	Mpcp	23.2916	182.14	146.901	106.159	155.506	212.539	241.879
FBgn0032821	CdGAPr	23.2794	14.659	10.7562	8.55304	5.57775	3.11415	1.64569
FBgn0023143	Uba1	23.2339	23.4649	22.4395	29.0081	35.3739	47.0439	59.9098
FBgn0031021	CG12203	23.196	34.993	32.8085	29.5225	32.9993	35.8145	28.3141
FBgn0263109	CG43366	23.1911	1.90675	14.5594	3.71563	1.39103	0.267074	0.0711835
FBgn0004876	cdi	23.1823	20.8944	7.67778	8.63315	16.3759	27.9942	16.8146
FBgn0033391	CG8026	23.1759	21.3595	30.7164	16.5472	13.9573	25.1101	316.586
FBgn0034761	CG4250	23.168	30.3179	37.6717	14.47	11.6682	14.6019	18.8855
FBgn0031474	CG2991	23.1598	24.0239	17.0937	10.8187	12.4614	22.0771	58.1587
FBgn0043841	vir-1	23.1416	21.8996	25.3435	120.421	488.928	639.57	307.607
FBgn0037960	mthl5	23.1404	14.5107	5.76855	3.48307	5.2357	65.8467	285.383
FBgn0262124	uex	23.1375	27.2369	24.6516	18.5969	20.9769	17.8608	14.4483
FBgn0030608	Lsd-2	23.1132	75.7344	69.9239	43.8977	17.3992	17.0937	22.2686
FBgn0267384	Ubc7	23.1008	26.8773	21.5828	19.7379	21.2955	25.1162	33.7044
FBgn0000382	csw	23.0969	15.433	28.3778	36.2709	57.9759	112.277	210.847
FBgn0032005	Snx6	23.082	23.8688	19.6545	21.1726	19.8814	16.0789	27.9659
FBgn0024836	stan	23.077	27.9852	10.2579	5.55911	1.77312	0.688286	0.83562
FBgn0023526	CG2865	23.0409	8.02508	7.01489	5.12068	3.21811	6.24433	81.9905
FBgn0004373	fwd	23.0254	78.3412	53.9209	27.0183	18.3137	17.6725	57.8948
FBgn0259227	CG42327	23.0047	18.1986	21.6835	14.1574	10.7276	11.2898	40.5944
FBgn0035251	CG7967	22.9907	21.6484	19.2655	21.6747	27.4491	33.1449	30.4637
FBgn0032407	Pex19	22.9763	45.7691	28.4267	33.6837	38.9668	38.3868	24.8567
FBgn0016697	Prosalpha5	22.9646	20.1778	12.8221	37.6028	32.8377	40.0385	24.8893
FBgn0038965	mats	22.9493	25.4243	17.3879	15.1659	15.4319	20.1946	26.2906
FBgn0000611	exd	22.9161	33.0011	28.9191	27.3377	29.3061	33.5781	23.025
FBgn0041111	lilli	22.8911	15.8269	9.70442	8.46441	6.48658	7.81258	11.4126
FBgn0052654	Sec16	22.8905	27.4851	20.0843	17.717	14.2672	9.61347	10.9198
FBgn0267330	KdelR	22.8793	24.8029	22.0398	18.7583	13.6635	10.1844	4.26705
FBgn0085638	CG41378	22.8574	68.1729	15.3066	15.5602	20.3954	24.4801	16.5015
FBgn0262057	Spn77Ba	22.8295	37.2074	12.4226	39.1267	65.36	157.685	332.856
FBgn0053995	CG33995	22.8271	10.7302	42.8829	20.3703	11.3283	2.50901	1.14951
FBgn0021800	Reph	22.8048	35.3524	20.8182	5.83316	9.9975	9.65048	10.5624
FBgn0004237	Hrb87F	22.7982	10.0806	10.4481	10.9543	9.12531	9.15698	5.3693
FBgn0038271	CG3731	22.7584	117.517	42.9813	47.1239	55.8692	51.9491	23.5878
FBgn0033736	CG13154	22.7394	16734.2	13.615	0.649678	0.179685	0.8914	11.5036
FBgn0027080	Aats-tyr	22.7161	14.0968	20.4893	17.8305	17.1487	34.15	44.6739
FBgn0038181	CG9297	22.7151	1.77415	3.98515	0.481365	0.913064	1.19426	5.05045
FBgn0263490	mld	22.7014	27.6202	23.6285	13.2161	6.17722	20.9623	10.491
FBgn0004638	drk	22.692	15.7823	13.8516	19.6559	24.0814	87.5881	296.567
FBgn0259979	CG17337	22.6655	42.3022	50.2197	23.1448	30.5303	28.5586	20.512
FBgn0030351	CG1840	22.6617	15.9238	11.3118	9.36749	7.62524	8.24341	2.15592
FBgn0051716	Cnot4	22.6559	31.4246	25.232	23.0112	26.8667	33.638	66.4556
FBgn0030718	CG9172	22.6287	45.1933	25.269	26.5194	29.8285	35.457	25.0759
FBgn0262733	Src64B	22.6101	10.3085	8.37823	6.12385	4.04056	2.92294	5.2455
FBgn0086365	Orct2	22.608	17.3583	11.4511	5.45192	2.22511	0.572998	1.75612
FBgn0039450	CG5484	22.6038	18.0507	11.0758	13.75	9.02925	6.0345	3.2765
FBgn0058263	MFS17	22.5636	47.274	24.5301	17.6884	21.5645	31.3045	25.8637
FBgn0035499	Chd64	22.5118	31.7234	125.769	1643.29	3814.69	5075.46	4398.93
FBgn0267336	Glut4EF	22.5116	27.8315	20.9857	20.9924	19.3462	58.563	35.3608
FBgn0029791	CG4096	22.5091	4.62322	7.20729	1.14919	1.88283	4.47586	41.7134
FBgn0261722	fwe	22.5028	24.7441	16.4878	17.4646	17.8178	13.1004	10.2973
FBgn0033466	Pal1	22.4607	41.8537	17.664	11.1934	8.25113	5.40321	6.88345
FBgn0262114	RanBPM	22.4591	15.5354	19.0414	23.2869	19.948	20.5828	27.0751
FBgn0036623	CG4729	22.4421	22.9042	24.8012	20.4376	15.0136	9.50451	5.32808
FBgn0038129	CG8449	22.4393	7.1406	4.07376	4.1673	3.811	3.40686	6.68412
FBgn0031360	CG31937	22.4186	23.7355	12.3677	13.7848	10.6621	11.0535	12.7545
FBgn0030734	CG9911	22.3687	23.0592	24.7744	23.4705	20.1045	18.5114	18.0519
FBgn0264273	Sema-2b	22.3422	20.2121	18.6964	10.9251	9.17553	4.20734	2.96403
FBgn0033555	RpS15Ab	22.3325	23.2418	15.5604	17.1204	14.9399	13.0192	11.5531
FBgn0003415	skd	22.321	7.44228	9.29485	8.14859	8.56782	7.75387	8.42435
FBgn0260746	Ect3	22.3187	0.216368	0.524052	0.204952	0.0368853	0.358046	9.5912
FBgn0029823	CG3011	22.3061	6.7555	22.2452	17.7712	12.4441	7.29387	2.89022
FBgn0086656	shrb	22.2521	26.8013	18.1701	29.9965	60.3704	146	230.925
FBgn0085261	CG34232	22.2401	19.4938	31.9158	7.68197	2.63883	0.397153	2.15001
FBgn0039266	CG11791	22.2131	38.0098	30.7507	37.8758	36.1236	48.3771	87.8684
FBgn0262169	magu	22.1723	8.84694	9.89537	0.724009	0.627932	0.789697	1.38824
FBgn0024889	Kap-alpha1	22.1551	22.8076	15.6171	13.5021	13.6921	22.6534	50.8241
FBgn0036017	CG3280	22.1439	0.62715	0.893082	0.266072	0.180664	3.27795	5.08335
FBgn0011227	ox	22.1269	102.806	24.0626	20.0189	37.3127	43.5856	22.0812
FBgn0067779	dbr	22.1177	11.2912	8.70519	9.82696	13.5443	30.9947	38.0342
FBgn0085436	Not1	22.0995	21.0154	20.8277	22.4543	25.6596	30.5071	38.9665
FBgn0033480	mRpL42	22.0542	14.3135	7.84164	8.79923	9.72375	7.11784	3.70635
FBgn0039495	CG5909	22.0412	1.71745	1.08432	0.212488	0.530452	1.29837	45.13
FBgn0039160	CG5510	22.0041	5.98601	4.54345	11.0262	10.6346	7.8254	21.9454
FBgn0038071	Dtg	21.9882	10.7258	16.5387	5.70058	2.53426	0.627855	0.119249
FBgn0033428	Updo	21.9783	27.1408	25.9827	23.2028	16.4982	13.6337	7.91828
FBgn0034364	CG5493	21.9445	8.12663	0.395903	0.0499134	0.0575699	0	1.65379
FBgn0035944	CG5021	21.9437	28.9413	17.201	23.9187	21.3602	17.6605	12.0377
FBgn0266186	Vamp7	21.936	39.4866	31.6249	24.5559	23.033	27.9082	38.5837
FBgn0261854	aPKC	21.9335	11.2036	18.2265	24.6673	25.2675	20.0431	13.7849
FBgn0260972	alc	21.9301	35.7403	29.8006	31.359	23.8161	32.018	78.0764
FBgn0035049	Mmp1	21.9116	96.1466	13.218	1.43321	0.914288	44.7985	6333.2
FBgn0038039	CG5196	21.9051	14.1629	9.06999	8.3208	6.65164	4.05544	4.04487
FBgn0031437	Arpc5	21.8951	20.2539	16.3344	25.4693	35.5322	32.7943	33.2782
FBgn0001114	Glt	21.8933	30.9693	19.2946	10.1088	7.55235	6.85355	2.78274
FBgn0019643	Dat	21.8801	8.99709	4.09965	0.710248	0.362578	0.474869	27.816
FBgn0029830	Grip	21.8706	25.8338	6.42577	0.866115	0.337755	0.205555	0.443629
FBgn0035252	CG7970	21.8491	15.1345	25.1324	31.9699	32.9662	29.8783	14.5941
FBgn0262139	trh	21.8195	18.5498	12.0988	7.43785	2.92255	1.66982	1.14116
FBgn0263260	sel	21.8138	4.59391	7.08342	4.61068	1.78629	2.13326	5.01234
FBgn0044323	Cka	21.8035	15.4286	20.5813	19.6153	20.3222	20.1937	122.287
FBgn0030808	RhoGAP15B	21.7716	20.3515	24.9512	18.0115	9.62296	7.41098	17.3659
FBgn0034577	cpa	21.7624	19.737	18.779	28.5962	36.4815	31.8938	26.2104
FBgn0034859	CG3520	21.7285	4.72235	0.890639	0.680884	0.326548	0.750723	5.79206
FBgn0031187	CG14619	21.7035	10.7651	10.7222	15.1668	20.6271	60.7728	112.176
FBgn0035692	CG13298	21.6786	29.0751	20.2784	14.6492	14.256	16.2578	17.3536
FBgn0005640	Eip63E	21.6376	27.6171	14.1405	7.18304	3.73409	3.69354	27.234
FBgn0028341	l(1)G0232	21.5887	8.08547	10.8485	6.06565	6.38301	21.8719	37.0927
FBgn0010620	Sip1	21.5495	150.865	63.8159	69.7294	54.2563	98.9764	149.502
FBgn0052264	CG32264	21.5287	67.5416	24.9575	17.5381	17.4469	41.9986	82.0816
FBgn0001098	Gdh	21.5006	11.636	23.5039	16.6087	57.1543	40.466	13.3905
FBgn0039864	CG11550	21.4945	395.964	189.802	5.48375	2.11926	1.8075	6.00538
FBgn0032138	CG4364	21.4844	17.1448	34.6658	24.8436	15.3471	24.6122	35.5446
FBgn0031057	Ubqn	21.4432	18.3391	18.7584	19.0755	22.7048	32.1275	32.8662
FBgn0037299	Vps37B	21.4007	25.7302	22.4313	30.7462	35.0377	71.1189	168.171
FBgn0040334	Tsp3A	21.3797	8.81068	4.1417	4.49779	3.09219	3.17658	6.71365
FBgn0261477	slim	21.3769	14.5271	11.6079	15.3448	13.1169	20.236	21.2478
FBgn0037261	CG9775	21.3472	34.3873	41.7692	41.3877	45.7881	46.4673	63.1368
FBgn0034808	CG9896	21.3457	3.55213	4.52477	3.50742	5.01341	1.69505	1.37105
FBgn0032859	Arpc2	21.2776	24.3368	23.0149	28.6552	44.9681	34.9529	36.867
FBgn0041181	Tep3	21.2696	111.974	72.0104	35.9542	37.9011	63.3898	84.589
FBgn0032511	CG9306	21.252	58.1967	19.6261	22.8153	27.9559	37.863	25.121
FBgn0025628	CG4199	21.2369	13.2326	59.1737	257.836	236.471	251.056	174.462
FBgn0004101	bs	21.194	32.1718	35.5149	35.8324	40.1841	58.6283	75.2123
FBgn0033570	CG7712	21.1923	62.4156	26.6478	29.0259	32.0088	32.7633	20.4497
FBgn0036196	CG11658	21.1884	146.037	8.28613	9.88629	2.59957	10.8343	140.399
FBgn0019830	colt	21.1608	15.1922	8.67816	11.9933	13.9798	12.4941	7.61626
FBgn0036043	CG8177	21.1432	2.23569	1.60678	1.73298	4.41844	21.9085	105.979
FBgn0036621	roq	21.1243	12.0275	6.65801	8.69988	11.3543	17.6413	55.6589
FBgn0039501	CG5987	21.0996	8.2853	1.30743	0.60316	0.488386	0.229284	0.301071
FBgn0039561	mfrn	21.077	26.1188	6.68014	6.05601	5.21245	5.32507	5.0953
FBgn0003392	shi	21.0707	22.188	21.9172	21.2572	20.9877	26.3437	22.9609
FBgn0051195	CG31195	21.0625	43.7618	78.5767	91.3687	69.982	34.0355	14.6061
FBgn0261268	Cul3	21.0586	14.3474	13.2771	12.7091	11.4403	11.7059	14.603
FBgn0042138	CG18815	21.0578	19.2896	11.8207	12.0998	22.0583	31.1513	17.3742
FBgn0017581	Lk6	21.0577	26.0129	30.1766	39.7444	52.3956	60.521	228.47
FBgn0033518	Prx2540-2	21.0485	12.383	15.1925	25.1069	8.02669	42.2107	425.016
FBgn0051301	CG31301	21.0376	14.4582	13.0044	9.41984	8.61557	6.69867	4.65214
FBgn0019660	roX2	21.0239	8.44892	10.7887	9.08669	10.7184	6.64625	10.0954
FBgn0011666	msi	20.9852	52.4413	15.0508	7.49704	3.97243	2.10928	3.6209
FBgn0035825	CG8111	20.9526	10.502	7.8071	14.4602	16.0574	12.6795	8.50844
FBgn0036715	Cad74A	20.9486	213.081	21.6419	7.71437	1.19628	0.308572	1.36859
FBgn0016756	Ubp64E	20.9433	19.942	18.1891	18.4539	20.6749	20.8542	26.6883
FBgn0035046	NDUFA8	20.9359	29.2556	15.3857	19.3812	25.0121	24.0865	18.0886
FBgn0031053	CG14223	20.9214	16.4131	25.1832	23.3485	10.41	2.65202	2.69621
FBgn0030479	Rbp1-like	20.9162	59.5512	44.4438	44.2163	52.3426	51.0733	18.3017
FBgn0033584	CG7737	20.9065	8.24671	4.45579	1.06517	1.14032	0.815118	0.879366
FBgn0259228	C3G	20.9039	18.8756	7.91954	3.22174	3.23423	4.53935	13.0454
FBgn0259168	mnb	20.9027	12.3895	9.43991	6.38617	5.49327	7.38755	68.4374
FBgn0028694	Rpn11	20.9013	18.8585	19.1527	42.2325	46.2873	54.341	42.9392
FBgn0058042	CG40042	20.8992	40.328	25.5825	33.3173	40.0054	51.5487	63.3957
FBgn0011573	Cdc37	20.8792	48.9116	43.4127	41.6676	42.0077	39.891	25.22
FBgn0033866	CG6280	20.8742	2042.55	3.28786	4.06319	4.7147	3.96097	1.77135
FBgn0037234	CG9795	20.8721	17.7528	15.1024	15.4511	13.335	12.8308	20.4983
FBgn0011655	Med	20.8519	16.7338	12.7686	9.00323	9.02825	7.35331	8.76901
FBgn0000116	Argk	20.847	129.848	62.7456	17.3259	82.3024	170.342	100.867
FBgn0011640	lark	20.8314	16.3001	18.2975	25.7312	17.3441	19.6625	20.4775
FBgn0264672	Eogt	20.8289	8.00081	6.68554	11.8115	15.9698	7.33129	4.28813
FBgn0044826	Pak3	20.8076	18.9295	15.7813	11.7127	9.91201	11.0708	33.17
FBgn0031738	CG9171	20.8008	7.43454	6.91249	5.97016	19.2884	42.0399	37.9018
FBgn0038727	CG7432	20.7867	64.4017	6.68072	5.57852	9.61917	5.41648	1.9661
FBgn0030485	CG1998	20.771	10.4847	5.08599	2.10841	2.75434	3.39726	5.25464
FBgn0025724	beta'COP	20.7443	28.2428	16.114	14.3511	13.1151	11.6527	6.5426
FBgn0052278	CG32278	20.686	18.0167	20.8548	17.6594	14.4439	10.0482	6.67765
FBgn0040513	kappaB-Ras	20.6799	7.28013	2.97219	4.5067	4.92643	6.5188	7.90425
FBgn0032015	Ostgamma	20.6787	16.2058	8.53201	6.65728	5.11895	4.29849	1.03873
FBgn0039955	CG41099	20.6534	16.1881	9.74862	7.89537	9.84404	11.4098	8.696
FBgn0261396	Rpn3	20.6473	19.533	17.345	38.0497	39.389	50.5419	52.0642
FBgn0266000	CG44774	20.6062	12.3569	13.2567	16.5072	24.8659	18.3593	22.5746
FBgn0026533	Dek	20.6043	11.0599	14.3666	12.5809	13.8489	7.35851	2.83921
FBgn0039430	CG5455	20.5821	10.9175	20.5275	13.9174	11.3444	6.55763	16.6747
FBgn0031842	Tango1	20.5616	14.4121	18.2898	11.6618	10.5338	14.452	18.4708
FBgn0022984	qkr58E-3	20.5497	23.0783	14.8125	15.554	16.0675	13.8987	7.97829
FBgn0010039	GstD3	20.5492	6.26256	5.97489	1.49755	2.04294	2.35122	1.18162
FBgn0013334	Sap47	20.5305	8.18706	9.28021	9.24795	12.7302	16.3921	18.4329
FBgn0036566	ClC-c	20.5066	25.176	15.9221	14.4146	13.4522	17.2321	24.2593
FBgn0028690	Rpn5	20.4794	23.294	19.5964	43.1414	46.4109	61.3123	40.9472
FBgn0002945	nkd	20.4599	12.0668	9.08	4.72806	1.20746	0.961787	3.56955
FBgn0032200	CG5676	20.4049	33.6043	22.8459	28.3251	34.9341	33.9194	19.7454
FBgn0023517	Pgam5	20.4011	5.51387	4.49762	5.23841	4.77524	4.74797	2.54807
FBgn0262971	CR43282	20.4004	102.84	8.3984	0	0.0962123	0.26518	0.338868
FBgn0041004	CG17715	20.3958	26.19	16.2788	21.7351	26.7579	33.1467	36.1386
FBgn0261641	CG42724	20.3796	10.103	9.80884	9.79028	9.12608	6.11413	2.27121
FBgn0040153	l(1)G0469	20.379	10.523	18.0451	9.96949	33.2602	32.6225	28.2437
FBgn0029082	hbs	20.377	21.1044	20.2981	12.9523	5.23377	1.26845	0.492753
FBgn0036896	wnd	20.373	15.905	18.2819	15.5757	10.5555	6.44708	34.3736
FBgn0038220	CG12207	20.3684	99.5278	60.8373	26.4517	35.7157	57.8289	123.169
FBgn0028968	gammaCOP	20.3564	21.1461	15.6544	15.1918	14.2022	14.9228	7.61455
FBgn0039674	CG1907	20.3561	31.2525	12.0943	33.6851	29.0718	17.3296	13.7722
FBgn0040752	Prosap	20.3475	11.2246	37.7533	29.604	20.7565	7.57881	4.20329
FBgn0260742	CG12213	20.3294	23.2724	24.8018	31.119	23.6751	14.3337	5.56101
FBgn0038877	CG3308	20.3278	18.1503	14.4157	15.357	22.2814	30.1975	36.8864
FBgn0028494	CG6424	20.3231	16.5276	17.2847	10.8552	21.7445	98.6858	44.595
FBgn0027280	l(1)G0193	20.3201	29.0516	18.3905	18.0003	14.034	25.5658	439.005
FBgn0019957	ND42	20.2338	60.5057	26.2553	26.9809	30.2778	34.0863	18.5541
FBgn0037312	CG11999	20.2314	7.73937	6.40475	4.72371	2.90458	1.76114	1.32153
FBgn0035726	CG9953	20.223	11.0876	10.31	8.79426	9.89412	6.84775	16.3015
FBgn0259481	Mob2	20.2144	11.002	20.5554	6.41645	8.46082	14.3414	74.8186
FBgn0030545	CG11590	20.1892	19.1482	10.0505	9.02151	6.6742	6.43185	5.52908
FBgn0011770	Gip	20.1298	73.6851	30.6806	16.5232	11.6017	13.149	14.9271
FBgn0037700	CG8149	20.1096	30.5332	21.9687	19.6421	18.0113	14.2621	8.45639
FBgn0036436	CG4914	20.0748	42.8948	1.24333	0.937543	0.24887	0	0
FBgn0262518	Rab8	20.0705	16.9361	13.9307	17.5342	18.9801	16.3309	11.9227
FBgn0000289	cg	20.069	16.3091	16.7382	11.903	11.1054	13.6085	10.8281
FBgn0260794	ctrip	20.0622	11.1266	13.4795	26.4329	35.5149	28.0104	13.5298
FBgn0029174	FKBP59	20.0537	21.6574	15.4504	16.5559	12.2939	9.0786	7.4877
FBgn0052137	CG32137	20.0221	16.4568	56.7124	39.1792	15.7024	16.8542	45.9178
FBgn0010051	Itp-r83A	20.0178	21.1991	7.75212	5.59179	6.13318	8.00325	14.0404
FBgn0266721	gammaSnap2	19.9743	2.34266	2.33888	0.554735	0.579381	0.278284	0.273936
FBgn0001961	Arpc1	19.9719	21.2621	24.2254	36.2085	48.4877	63.1015	68.1896
FBgn0262716	Arp3	19.9641	16.3526	18.3207	30.7764	33.2556	25.1857	11.935
FBgn0000339	cni	19.9576	20.0836	26.1267	37.3258	38.4038	55.6085	51.4601
FBgn0001202	hk	19.9571	12.4256	11.3506	10.3146	10.3772	18.412	15.8343
FBgn0022959	yps	19.9311	28.8474	38.3098	34.4972	32.2924	29.6757	13.3073
FBgn0032036	CG13384	19.9309	16.6908	7.84074	8.71748	7.75188	7.69601	11.5503
FBgn0035285	CG12025	19.8945	25.3688	19.9843	23.891	26.1862	31.2895	150.372
FBgn0085284	Blos3	19.8852	13.5775	14.3532	17.2517	8.34054	8.10149	3.40348
FBgn0011742	Arp2	19.8837	25.7951	23.2078	29.0279	35.306	25.6133	29.7821
FBgn0002431	hyd	19.8749	19.941	17.4476	15.7665	15.5367	16.3022	10.0615
FBgn0261548	CG42666	19.8714	10.0877	4.33564	3.158	6.53012	10.4479	61.1676
FBgn0015794	Rab18	19.8332	17.987	18.9029	12.5045	18.3427	31.8856	30.008
FBgn0031771	CG9140	19.8294	58.085	28.2004	28.8258	33.9297	36.5237	27.9318
FBgn0025117	und	19.8277	19.226	33.2997	38.1405	43.6949	68.6429	108.066
FBgn0031957	TwdlE	19.8053	169.982	663.831	253.678	75.7045	5.71332	0.887566
FBgn0030292	CG11752	19.7884	30.9195	12.0738	16.1991	19.0936	13.2563	10.0625
FBgn0037556	CG9636	19.7667	22.809	13.0453	11.0849	11.3817	6.52473	3.47039
FBgn0027079	Aats-val	19.7651	9.68776	6.89913	5.93576	4.31068	5.85841	2.65439
FBgn0040496	CG17104	19.7589	11.6447	5.18758	6.35265	5.1977	34.655	279.948
FBgn0051158	Efa6	19.7459	19.311	14.7627	5.45869	5.07697	3.16329	4.25015
FBgn0039936	CG11148	19.7039	21.2285	19.6761	18.4491	19.4022	22.7868	31.7255
FBgn0025741	PlexA	19.6954	26.3559	24.5345	20.2139	19.9022	16.0356	11.8523
FBgn0051678	CG31678	19.6897	19.9827	17.012	4.92746	6.41901	5.99041	2.70192
FBgn0005674	Aats-glupro	19.6476	23.6451	6.39008	7.58185	7.70724	4.4986	2.0651
FBgn0010551	Phb2	19.6274	41.3831	15.306	9.578	13.1704	9.23787	2.24562
FBgn0026189	prominin-like	19.622	42.6345	34.0318	17.6765	6.81069	5.06141	99.8973
FBgn0037470	CG1091	19.6217	13.5792	12.9457	8.70442	6.31903	3.28089	0.916501
FBgn0045761	CHKov1	19.6064	16.6693	29.3359	21.5183	12.1352	6.31385	28.1825
FBgn0035000	CG13578	19.576	14.1158	11.107	7.03963	4.38662	5.08134	5.17753
FBgn0264357	SNF4Agamma	19.5405	22.3696	24.4578	23.1837	27.4008	30.4634	170.087
FBgn0011290	Taf12	19.532	16.0554	11.9624	15.7823	13.6705	15.3601	11.4283
FBgn0023129	aay	19.4971	15.4119	41.2138	7.91388	25.5544	47.8125	171.036
FBgn0029888	CG3192	19.4971	61.6817	24.9524	22.3487	33.0614	31.2244	20.0067
FBgn0004179	Csp	19.488	18.4931	26.7426	23.363	27.264	31.8602	26.5455
FBgn0030658	CG7872	19.4832	8.04428	9.33576	20.9769	11.612	4.75571	4.5152
FBgn0003862	trx	19.4599	19.4476	15.1992	9.04011	9.73494	10.1148	17.8399
FBgn0037573	eIF4AIII	19.4571	13.5827	10.2699	12.1337	13.4241	12.3345	6.62678
FBgn0036576	CG5151	19.4339	15.9071	13.7685	4.30799	6.46737	16.8386	20.1782
FBgn0003423	slgA	19.4196	47.7162	13.7485	9.66872	14.7518	14.9839	41.4751
FBgn0027525	CG7686	19.4102	15.7536	35.283	31.3731	31.7858	49.3731	79.9564
FBgn0032010	CG8086	19.4038	1.70103	60.3412	258.989	369.266	111.823	18.4025
FBgn0034724	babos	19.3904	23.891	19.3981	30.4497	25.7387	5.95576	75.8344
FBgn0037472	CG10098	19.3843	12.5863	14.8124	14.7146	18.7496	32.0042	52.2404
FBgn0029006	Smurf	19.344	19.0379	15.5834	17.0921	13.6232	13.2981	9.70896
FBgn0037063	CG9391	19.337	31.8399	9.46911	13.7131	12.4594	10.7135	5.20031
FBgn0037239	CG11739	19.3331	24.6271	2.91256	0.60341	0.62723	0.245126	0.338999
FBgn0016794	dos	19.3289	21.452	11.9438	7.7616	6.17761	6.79421	14.3258
FBgn0034021	CG8180	19.3279	27.1191	31.797	34.4804	33.5776	21.7253	18.2221
FBgn0038879	CG17298	19.3187	1.52691	1.06753	7.08742	386.412	31748.5	46515.2
FBgn0001992	Cyp303a1	19.3173	1037.61	3.05924	0.30036	0.203473	0.0644393	0.184808
FBgn0039492	CG6051	19.3147	25.0817	28.9151	26.1198	25.7788	73.0911	385.123
FBgn0086378	Alg-2	19.3038	25.9155	23.1714	21.959	24.789	21.9416	18.8631
FBgn0028342	l(1)G0230	19.3022	84.1733	29.0914	39.5701	58.2604	67.0291	39.8459
FBgn0035229	CG7852	19.2989	13.7856	8.07428	7.86052	5.37507	5.81907	13.7325
FBgn0038381	CG3303	19.2771	29.5849	19.8519	20.1759	13.3792	6.44653	4.0002
FBgn0028978	trbl	19.2682	11.7077	7.39381	13.3395	30.5797	49.5984	27.2888
FBgn0020386	Pdk1	19.2648	13.7765	23.7431	22.7061	22.1352	28.1122	31.8172
FBgn0034059	CG8320	19.2533	21.3343	17.2688	7.92916	4.09897	5.24486	5.61015
FBgn0036663	CG9674	19.2327	24.8209	18.4478	5.87802	25.5636	31.838	23.9147
FBgn0058439	CG40439	19.2049	27.21	21.857	28.468	34.2979	32.5137	55.9091
FBgn0086346	ALiX	19.2028	33.92	27.2711	25.886	32.5304	33.8198	52.62
FBgn0051717	CG31717	19.2004	20.7119	13.3536	12.522	13.3235	16.9847	20.4605
FBgn0261573	CoRest	19.1954	17.5498	15.2381	16.8778	15.469	21.2491	17.298
FBgn0016685	Nlp	19.1795	9.78359	8.89157	10.5491	10.4048	6.36554	1.69401
FBgn0035243	CG13926	19.1707	13.2134	10.1377	8.43999	7.9783	9.3782	5.85519
FBgn0032404	RpL7-like	19.1579	15.4117	23.0573	14.6719	10.0748	12.1343	18.0252
FBgn0029801	CG15771	19.1436	14.0929	4.31408	3.33291	1.71925	3.42491	475.417
FBgn0034645	CG10320	19.1307	47.1525	22.5093	33.2269	39.8383	40.2752	31.362
FBgn0035088	CG3776	19.1297	30.8628	25.3616	18.6493	15.4576	9.42564	8.38309
FBgn0261801	CG42747	19.1067	15.4515	10.2508	4.81089	4.14384	14.4161	6.43377
FBgn0026401	Nipped-B	19.0777	20.942	19.8325	14.2631	14.1045	14.8075	14.574
FBgn0004197	Ser	19.0636	7.96176	10.3841	10.9068	5.01919	1.4692	0.746282
FBgn0032467	CG9934	19.0542	8.11805	6.32714	9.3132	8.02905	9.13349	20.069
FBgn0035260	CG7991	19.0356	14.3643	61.9853	19.8494	8.69165	1.43322	33.1457
FBgn0010280	Taf4	19.0293	17.0255	16.9527	17.0157	16.2364	15.4012	14.739
FBgn0037846	CG6574	19.0285	5.33858	3.27892	4.33058	3.77446	30.9647	66.2205
FBgn0083940	RhoU	19.0256	18.9357	10.2409	7.53413	12.0483	19.4255	9.53663
FBgn0039291	CG13663	18.9752	15.2518	8.24101	12.1157	8.62915	6.41476	4.4447
FBgn0000497	ds	18.968	31.5474	43.6629	22.3945	14.8239	6.17976	2.03698
FBgn0037001	CG6020	18.9385	51.8786	21.9995	25.2267	41.6368	40.7389	27.3825
FBgn0031217	CG11377	18.9347	4.41247	3.39045	3.72601	3.43172	1.43187	0.804708
FBgn0035631	Txl	18.9189	29.3707	20.8956	32.9116	34.9814	46.3744	34.2978
FBgn0028540	CG9008	18.9113	31.4463	45.2339	6.52728	4.29842	5.09803	4.05896
FBgn0024987	ssx	18.9112	13.2786	10.2308	12.5719	17.3556	15.0185	13.4452
FBgn0004914	Hnf4	18.8833	25.516	21.5017	10.4761	14.5529	17.5403	48.5305
FBgn0265935	coro	18.8692	33.0063	22.4379	15.4694	18.0551	24.8818	69.8892
FBgn0033519	CG11825	18.864	5.0885	9.08451	3.69051	1.84532	4.35954	41.0708
FBgn0266435	CG45065	18.8628	28.5253	2.74743	0.489915	0.0422353	0.53289	0.320577
FBgn0040931	CG9034	18.8593	33.1984	15.9717	22.199	20.8622	24.2002	18.3947
FBgn0036155	CG6163	18.8363	4.58721	0.476553	0.0607091	0.125113	0.12311	0.256205
FBgn0035875	Cpr66Cb	18.8297	6989.35	231.592	10.7202	7.30928	1.06925	8.0221
FBgn0038196	CG9922	18.8058	26.7841	30.2668	14.1017	9.17432	6.78171	5.16603
FBgn0038321	CG6218	18.7864	42.3946	13.089	5.74383	4.86839	11.3562	14.7564
FBgn0039229	Saf-B	18.7587	17.9879	18.4194	25.6713	23.8251	23.6538	8.75303
FBgn0033402	Myd88	18.7395	9.67794	13.4154	12.6025	16.1733	49.1057	109.459
FBgn0266199	CR44894	18.731	18.7982	11.5614	8.6611	11.5867	18.8886	8.55161
FBgn0017572	Mo25	18.7243	18.6376	16.1795	15.0884	19.4057	23.565	22.2811
FBgn0034061	CG8386	18.7075	35.5788	18.878	10.8614	8.473	7.44525	16.393
FBgn0003744	trc	18.6691	19.9294	15.6839	18.8468	21.4825	32.0554	57.3802
FBgn0029648	CG3603	18.6283	16.1574	16.9262	10.2416	8.97432	12.3611	5.76223
FBgn0261439	SdhA	18.6089	40.7073	28.1009	18.0428	19.3508	12.9589	6.25017
FBgn0026076	UBL3	18.6058	21.4925	17.6211	16.5381	17.6285	23.4925	15.2364
FBgn0000097	aop	18.5984	207.65	12.0548	1.38446	0.491021	0.702804	522.66
FBgn0031497	CG17259	18.5904	32.4091	10.3138	14.4839	12.5036	16.9987	9.5464
FBgn0263108	BtbVII	18.5882	20.5994	14.845	14.2539	14.0841	19.0855	30.9556
[truncated: 15,244 more rows]
